## **Synaptic targets of functionally specialized R7 and R8 photoreceptors in the central eye and dorsal rim area of *Drosophila***

Emil Kind<sup>1,\*</sup>, Kit D. Longden<sup>2,\*</sup>, Aljoscha Nern<sup>2,\*</sup>, Arthur Zhao<sup>2,\*</sup>, Gizem Sancer<sup>1,3</sup>,  
Miriam Flynn<sup>2</sup>, Connor Laughland<sup>2</sup>, Bruck Gezahegn<sup>2</sup>, Henrique Ludwig<sup>2</sup>, Alex Thomson<sup>2</sup>,  
Tessa Obrusnik<sup>1</sup>, Paula G. Alarcón<sup>1</sup>, Heather Dionne<sup>2</sup>, Davi D. Bock<sup>2,4</sup>, Gerald M. Rubin<sup>2</sup>,  
Michael B. Reiser<sup>2,#</sup>, and Mathias F. Wernet<sup>1,#</sup>

1 : Institut für Biologie – Abteilung Neurobiologie, Fachbereich Biologie, Chemie & Pharmazie, Freie Universität Berlin, Königin-Luise Strasse 1-3, 14195 Berlin, Germany.

2 : Janelia Research Campus, Howard Hughes Medical Institute, Ashburn, USA

3: Current address: Department of Neuroscience, Yale University School of Medicine, Sterling Hall of Medicine C-400, 333 Cedar Street, New Haven, CT 06510, USA.

4: Current address: Department of Neurological Sciences, University of Vermont, Burlington, VT 05405, USA.

\* : These author contributed equally

#: Corresponding authors:

[reiserm@janelia.hhmi.org](mailto:reiserm@janelia.hhmi.org)

[mathias.wernet@fu-berlin.de](mailto:mathias.wernet@fu-berlin.de)

1 **Abstract**

2 **Color and polarization provide complementary information about the world and are**  
3 **detected by specialized photoreceptors. However, the downstream neural circuits that**  
4 **process these distinct modalities are incompletely understood in any animal. We have**  
5 **systematically reconstructed, using light and electron microscopy, the synaptic targets**  
6 **of the photoreceptors specialized to detect color and polarized light in *Drosophila*. We**  
7 **identified known and novel downstream targets that are selective for different**  
8 **wavelengths as well as for polarized light and followed their projections to other areas**  
9 **in the optic lobes and the central brain. Strikingly, photoreceptors in the polarization-**  
10 **sensitive dorsal rim area target fewer cell types, that lack strong connections to the**  
11 **lobula, a neuropil with a proposed role in color processing. Our reconstruction**  
12 **identifies shared wiring and modality-specific specializations for color and polarization**  
13 **vision, and provides a comprehensive view of the first steps of the pathways processing**  
14 **color and polarized light inputs.**

15

## 16 Introduction

17 Both the wavelength and the polarization angle of light contain valuable information  
18 that can be exploited by many visual animals. For instance, color gradients across the sky can  
19 serve as navigational cues, and skylight's characteristic pattern of linear polarization can also  
20 inform navigation by indicating the orientation relative to the sun (Heinze 2017; Figure 1A).  
21 The spectral content of light is detected by groups of photoreceptor cells containing rhodopsin  
22 molecules with different sensitivities, often organized in stochastic retinal mosaics (Rister and  
23 Desplan 2011), and specialized, polarization-sensitive photoreceptors have been  
24 characterized in many species, both vertebrates and invertebrates (Nilsson and Warrant  
25 1999). These two visual modalities, color and polarization vision, require the processing of  
26 signals of specialized photoreceptors over a great range of spatial and temporal scales, and  
27 many questions remain about how the signals from functionally specialized photoreceptors are  
28 integrated in downstream neurons. Are color and polarization signal mixed at an early stage,  
29 or are they processed by different, modality-specific cell types? Do separate pathways exist  
30 that selectively process and convey information from photoreceptor types in the retinal mosaic  
31 to targets in the central brain? The full scope of the early synaptic stages of color and  
32 polarization circuitry is unknown in any animal, and the analysis of EM connectomes is ideally  
33 suited to exhaustively answer them, especially when corroborated with genetic labelling of cell  
34 types and circuit elements in light microscopy. Mapping neuronal connections within the  
35 *Drosophila* Full Adult Fly Brain (FAFB) dataset (Zheng et al. 2018), combined with the available  
36 powerful genetic tools available in *Drosophila*, provides an opportunity to address these  
37 questions.

38 While studies in many insects have contributed to the understanding of polarized light  
39 and color vision (Homberg 2015; Dacke and El Jundi 2018; Heinze 2017; Hempel de Ibarra,  
40 Vorobyev, and Menzel 2014), the visual system of *Drosophila* offers many advantages for  
41 the exploration of neural circuits (Wernet, Huberman, and Desplan 2014). Anatomical studies  
42 are facilitated by the stereotyped, repetitive structure of the optic lobes, with many cell types,  
43 the so-called columnar neurons, found in repeated circuit units, called visual columns, that are

44 retinotopically arranged and each correspond to one of the ~800 unit eyes (ommatidia) of the  
45 compound eye. Many of over one hundred optic lobe cell types have been described in  
46 classical Golgi work (Fischbach and Dittrich 1989), by more recent studies combining genetic  
47 labeling with light microscopy, for example (Morante and Desplan 2008; Otsuna and Ito 2006;  
48 Wu et al. 2016; Nern, Pfeiffer, and Rubin 2015) and, for some cell types, through electron  
49 microscopic (EM) reconstructions that have revealed not only cell shapes but most importantly  
50 detailed synaptic connectivity (Takemura et al. 2015; Takemura et al. 2013; Takemura, Lu,  
51 and Meinertzhagen 2008; Meinertzhagen and O'Neil 1991; Rivera-Alba et al. 2011; Shinomiya  
52 et al. 2014). Furthermore, genetic tools (Jenett et al. 2012; Pfeiffer et al. 2008; Kvon et al. 2014;  
53 Dionne et al. 2018; Tirian and Dickson 2017), and, most recently, gene expression data (Davis  
54 et al. 2020; Konstantinides et al. 2018; Ozel et al. 2021; Kurmangaliyev et al. 2020) are  
55 available for many optic lobe cell types.

56 Each *Drosophila* ommatidium contains eight photoreceptor types whose output is  
57 processed in a series of synaptic layers called the lamina, medulla, lobula and lobula plate that  
58 together form the optic lobes of the fly (Fischbach and Dittrich 1989). Outer photoreceptors  
59 R1-6 project to the lamina neuropil, and serve as the main input to the motion vision circuitry  
60 (Mauss et al. 2017); inner photoreceptors R7 and R8 skip the lamina and project directly to the  
61 deeper medulla neuropil, that also receives lamina projections (Fischbach and Dittrich 1989).  
62 In the main part of the retina, R7 and R8 differ in their axonal target layers, with R7 projecting  
63 to layer M6, and R8 to layer M3 (Fischbach and Dittrich 1989). R7 and R8 can also differ in  
64 their rhodopsin expression, being sensitive to short wavelength UV (R7) and blue (R8),  
65 respectively, in so-called 'pale' ommatidia (Chou et al. 1996; Papatsenko, Sheng, and Desplan  
66 1997), and to long wavelength UV (R7) and green (R8) in 'yellow' ommatidia (Salcedo et al.  
67 1999; Huber et al. 1997). Pale and yellow ommatidia are distributed randomly throughout the  
68 main part of the retina (Feiler et al. 1992; Fortini and Rubin 1990), at an uneven ratio that is  
69 conserved across insects (Wernet, Perry, and Desplan 2015; Kind, Belušič, and Wernet 2020).  
70 Meanwhile, along the dorsal rim area (DRA) of the eye, the ommatidia are morphologically and  
71 molecularly specialized for detecting skylight polarization (Wernet et al. 2012; Wernet et al.



72 2003; Wada 1974a), that *Drosophila* can use to set a specific heading (Mathejczyk and Wernet  
73 2020, 2019; Warren, Weir, and Dickinson 2018; Weir and Dickinson 2012). In the DRA  
74 ommatidia, R7 and R8 express the same UV rhodopsin (Rh3; Fortini and Rubin 1991, 1990)  
75 and detect perpendicular angles of polarized ultraviolet light (Weir et al. 2016). In contrast to  
76 the rest of the medulla, R7 and R8 in the DRA project to the same medulla layer (M6; Chin et  
77 al. 2014; Pollack and Hofbauer 1991; Fischbach and Dittrich 1989), where their targets are  
78 thought to include polarization-specific cell types (Sancer et al. 2020; Sancer et al. 2019;  
79 Hardcastle et al. 2021). Across insects, a ‘compass pathway’ connects the DRA to the central  
80 brain via an optic glomerulus called the anterior optic tubercle (AOTU; Homberg 2015;  
81 Hardcastle et al. 2021; Pfeiffer and Kinoshita 2012). Anatomical and functional data from  
82 *Drosophila* suggests that the central medulla is also connected to the compass pathway  
83 (Omoto et al. 2017; Hardcastle et al. 2021; Otsuna, Shinomiya, and Ito 2014), potentially  
84 forming parallel pathways for processing different celestial cues (Timaeus et al. 2020; Tai,  
85 Chin, and Chiang 2021).

86 Electron microscopy studies have begun to reveal some of the circuitry downstream of  
87 R7 and R8 (Takemura et al. 2015; Takemura et al. 2013; Gao et al. 2008). For example, axons  
88 of R7 and R8 from the same ommatidium are reciprocally connected with inhibitory synapses,  
89 leading to color-opponent signals in their presynaptic terminals (Schnaitmann et al. 2018).  
90 Interestingly, R7 and R8 in the DRA also inhibit each other (Weir et al. 2016). Other known R7  
91 and R8 targets in the main medulla include local interneurons (e.g. Dm8; Gao et al. 2008;  
92 Karuppudurai et al. 2014; Pagni et al. 2021; Menon et al. 2019) and projection neurons that  
93 provide connections to deeper optic lobe regions (e.g. Tm5 and Tm20 neurons; Karuppudurai  
94 et al. 2014; Meinertzhagen et al. 2009; Gao et al. 2008). A previous light microscopy study  
95 (Karuppudurai et al. 2014) identified a single cell type, Tm5a, that is specific for pale medulla  
96 columns; this neurons has been used to identify pale and yellow columns in an EM volume  
97 (Menon et al. 2019; Takemura et al. 2015; Karuppudurai et al. 2014). Using genetic labelling  
98 techniques, four classes of TmY cells have also been reported as specific targets of pale  
99 versus yellow photoreceptors (Jagadish et al. 2014), yet previous connectomic studies did not

100 reveal similar cells. The currently most comprehensive EM study of the medulla reconstructed  
101 the connections between neurons in 7 neighboring medulla columns (Takemura et al. 2015),  
102 revealing an exquisitely detailed inventory of cell types connected to R7/8. This dataset, now  
103 publicly available (Clements et al. 2020), is remarkable for its dense reconstruction of columnar  
104 circuits, but could not be used to identify many multicolumnar neurons, that were cut-off at the  
105 edge of the data volume, leaving 40% of R7/8 synapses to unidentified cell types. In addition,  
106 no EM-based reconstructions of DRA columns that would reveal the underlying synapses is  
107 currently available.

108         Here, we present a comprehensive reconstruction of all R7 and R8 synaptic outputs  
109 and inputs, from pairs of pale and yellow columns and from three DRA columns in the FAFB  
110 dataset. We discovered a large visual projection neuron with distinctive morphology, named  
111 accessory medulla cell type 12 (aMe12), that selectively innervates pale ommatidia across the  
112 whole medulla. We identified this cell in the FAFB dataset to enumerate the connectivity in two  
113 pale and two yellow columns of R7 and R8 with known and novel cell types within the optic  
114 lobes and projecting to the central brain, including more cells with pale-yellow specificity, and  
115 synapses on axons between neuropils. In the DRA, we show that cellular diversity is reduced,  
116 with local interneurons and projection neurons to the AOTU dominating, and connections to  
117 the lobula virtually missing. We identify circuit motifs shared between DRA and central  
118 columns, and describe modality-specific cell types, including cells with interhemispheric  
119 connections and projections to the central brain. Together, we identify the connected neurons  
120 that account for 96% of R7/8 synapses, a nearly complete set of the neurons that comprise  
121 the first step of the pathways through which color and polarization signals are transduced to  
122 the rest of the brain.

123

## 124 **Results**

### 125 Systematic reconstruction of all synaptic targets of different R7 and R8 photoreceptor subtypes

126         From an electron microscopic data set spanning the full adult female brain (FAFB;  
127 Zheng et al. 2018), we reconstructed R7 and R8 photoreceptor axons in the central region of

128 the right hemisphere, as well as R7/R8 pairs from 27 DRA columns (Figure 1C). From these,  
129 we selected seven 'seed columns' (four central, three DRA), for which all pre- and post-  
130 synaptic sites of the photoreceptor axons were identified and manually annotated in the EM  
131 images (Figure 1F; Material and Methods). There were 422 skeletons, corresponding to  
132 individual cells, contacted by the seed column photoreceptors, and we focused our analysis  
133 on the 245 individual cells with >2 synapses to or from the photoreceptors. We reconstructed  
134 the morphology of these cells with a sufficient degree of completeness to ascribe a unique cell  
135 type to 92% (225/245) or to identify a cell class (Dm, Mi, Tm, or TmY cell class) for an additional  
136 6.5% (16/245), so that 98% (241/245) of these cells were identified. We also traced and  
137 uniquely identified the cell type of all 30 cells that provided >2 synaptic inputs to the  
138 photoreceptors. In total, we identified 4043 synaptic connections from the seed column R7 and  
139 R8 photoreceptors, and 970 synaptic inputs to them, summarized in Figure 1H.

140 To distinguish between pale and yellow columns we took advantage of our recent  
141 discovery of one specific cell type from the 'accessory medulla' (aMe) that widely arborised in  
142 the medulla with ascending branches that align with the photoreceptors (Figure 1Ei-iii). The  
143 cell type was selective for R8 input, and showed a strong preference for innervating pale  
144 columns (Figure 1D, Eiii). We identified three of these cells per hemisphere (hereinafter  
145 referred to as aMe12), that had heavily overlapping arbors, but only rarely shared ascending  
146 branches in the same columns (3/779 columns). Using the presence of aMe12 branches, we  
147 were able to assign as pale 38% (297/779) of the medulla columns, in good agreement with  
148 studies on the retinal mosaic of *Drosophila* (Feiler et al. 1992; Fortini and Rubin 1990; Bell,  
149 Earl, and Britt 2007; Hilbrant et al. 2014). Since further analysis identified a total of 42 DRA  
150 columns (see below), we assigned the remaining columns as nominally yellow (Figure 1C).  
151 Our reconstructions also revealed another new pale-selective visual projection neuron, that we  
152 named ML-VPN1, and confirmed the previously reported yellow-selectivity of Tm5a cells  
153 (Menon et al. 2019; Karuppudurai et al. 2014), findings that further supported the designations  
154 of pale and yellow seed columns (see below).

155           After mapping the pale and yellow columns, we selected four adjacent central seed  
156 columns, two nominally pale and two nominally yellow (Figure 1C). Across the four central  
157 seed columns, the absolute number of both synaptic inputs and outputs for R7 and R8  
158 photoreceptors were in good agreement with previous reports analyzing a medulla FIB-SEM  
159 data set—a somewhat surprising result in light of the reported increases in synapse counts  
160 between TEM and FIB-SEM data sets (Takemura et al. 2015; Figure 1 – figure supplement  
161 2A-D). As we had access to the complete brain volume, we additionally found substantial  
162 numbers of synapses in the axon bundles projecting between the lamina and the medulla,  
163 which accounted for 14% and 12% of the output synapses for R7 and R8 respectively, and  
164 16% and 27% of their input synapses (Figure 1 F, Figure 1 – figure supplement 2G).

165           We readily identified columns in the DRA region of the medulla since it is only there  
166 that both R7 and R8 terminate in medulla layer M6 (Pollack and Hofbauer 1991; Fortini and  
167 Rubin 1991; Sancer et al. 2019; Chin et al. 2014; Fischbach and Dittrich 1989; Figure 1F,  
168 arrow). The morphology of DRA-specific Dm-DRA1 cells differs significantly between central  
169 and polar positions of the DRA (Sancer et al. 2019), and we therefore chose one polar DRA  
170 seed column and two more equatorial columns (Figure 1C). Beyond the 27 DRA columns with  
171 manually traced R7 and R8 photoreceptors we mapped the full extent of the DRA region by  
172 systematically probing for the presence of two inner photoreceptor profiles in layer M6 without  
173 reconstruction (see Materials and Methods), which resulted in a total of 42 identified DRA  
174 columns (Figure 1C). Direct comparison of the absolute number of pre- versus post-synaptic  
175 sites between central and DRA photoreceptors revealed drastic differences between R7 and  
176 R8: while the numbers of R7 and R7-DRA presynapses were comparable ( $250 \pm 27$  for R7-  
177 DRA vs  $285 \pm 26$  for R7), the number of R8-DRA presynapses was drastically reduced by ~60%  
178 compared to central columns ( $155 \pm 10$  for R8-DRA vs  $362 \pm 10$  for R8). In particular, there was  
179 a striking reduction in the number of synapses from R8 to cells intrinsic to the medulla and to  
180 cells that projected to the lobula (see below and Figure 1G, H).

181           We have endeavored to make this comprehensive data set as accessible and  
182 navigable as possible. In the following sections we first describe the connections of the central

183 eye R7 and R8 cells (Figure 2 – 5), following the sequence of cell classes in Figure 1G-H,  
184 before presenting the connections of the DRA (Figures 6 – 9). The synaptic outputs from and  
185 inputs to the central pale and yellow R7/8 cells are summarized in Tables 1-2, for the R7/8-  
186 DRA in Tables 3-4, and presentations of individual cell types include summaries of total R7/8  
187 synapse counts (e.g., Figure 1Eiii for aMe12). The text highlights downstream cell types that  
188 are selective for inputs from either R7 or R8, or are preferentially found in pale or yellow  
189 columns. We used 65% as the threshold to consider an input selective and tables of  
190 connectivities of the individual cells are arranged by cell type and collected together into a  
191 single file (Supplementary File 1). The main figures show the morphology of reconstructed  
192 exemplars, with the many full reconstructions noted (and listed in Materials and Methods),  
193 while the morphologies of individual cells are collected together into a single file  
194 (Supplementary File 2). For the cell types for which we are unaware of published, detailed  
195 descriptions, we endeavored to produce light microscopic images of single cell clones which  
196 were matched largely based on the cell body location, the extent and neuropil-layer-specific  
197 branching patterns, and comparisons to any other known cell types (see Materials and  
198 Methods). In a few cases, we also use light microscopy to illustrate specific features of known  
199 neurons or to explore additional properties (such as direct co-labeling with markers for pale  
200 and yellow columns) that are not readily accessible by EM.

201

## 202 Connections between central eye R7 and R8 photoreceptors, and with lamina cells

203 Photoreceptors R7 and R8 inhibit each other via direct histaminergic synapses, an  
204 important mechanism for converting their sensitivity to specific wavelengths into presynaptic  
205 color-opponency (Schnaitmann et al. 2018). We reconstructed a large proportion of the  
206 reciprocal synapses between the R7 and R8 cells from central seed columns in the axonal  
207 projection between the lamina and the medulla (Figure 2A, Figure 1 – figure supplement 2G).  
208 Axons of both R7 and R8 cells were thicker just before they entered the medulla, consistent  
209 with anatomical specializations in the optic chiasm (Fischbach and Dittrich 1989). For the R8  
210 cells, ~80% of the synaptic input from R7 cells was found in the axonal projection (mean 11.5

211 extramedulla synapses per cell, range 9-17), and the R8 inputs to the R7 cells in this region  
212 were as frequent (mean 10.3 extramedulla synapses per cell, range 5-13). These results were  
213 not anticipated by prior EM reconstructions that surveyed synaptic connections within the  
214 neuropils, and our numbers were therefore substantial increases in the numbers of inter-  
215 photoreceptor synapses (Takemura et al. 2015; Meinertzhagen and O'Neil 1991; Figure 1 –  
216 figure supplement 2D).

217 Photoreceptors R7 and R8 pass through the lamina without forming synapses there  
218 (Meinertzhagen and O'Neil 1991), and instead form synapses with lamina cell types within the  
219 medulla (Takemura et al. 2013; Takemura, Lu, and Meinertzhagen 2008). Our reconstructions  
220 further revealed that 58% of the R7/R8 inputs to the lamina cells L1 and L3 were also located  
221 within the optic chiasm (Figure 1 – figure supplement 1B, Figure 1 – figure supplement 2G,  
222 Figure 2 – figure supplement 1A-B).

223

#### 224 Central eye R7 and R8 connections with distal medulla cells

225 The distal medulla (Dm) neurons included the strongest targets of the R7 and R8  
226 photoreceptors (Table 1). Dm9 is a recently characterized glutaminergic cell type that provides  
227 excitatory feedback onto R7 and R8 cells, regulating their gain and augmenting their color-  
228 opponency (Heath et al. 2020; Davis et al. 2020; Uhlhorn and Wernet 2020; Gao et al. 2008).  
229 This cell type alone accounted for more than 90% all the synaptic inputs to the R7 and R8 that  
230 were not from photoreceptors (333/369 synapses, Table 2). Dm9 cells span multiple columns  
231 (Nern, Pfeiffer, and Rubin 2015; Takemura et al. 2015; Figure 2B), and we reconstructed a  
232 total of six Dm9 cells that were contacted by the eight R7/8 cells from our central seed columns,  
233 which together received 16% of all R7/8 synapses, and provided 57% of the total synapses to  
234 these cells (Tables 1, 2). One completely reconstructed Dm9 cell received 92 synapses per  
235 seed column (mean, range 78-102), and provided 70 synapses per seed column (mean, range  
236 64-78) offering the most detailed picture of Dm9 connectivity yet (Supplementary File 1—Dm9  
237 outgoing). While its R7 and R8 inputs were biased towards R8 (31% R7 vs 69% R8), the output  
238 synapses were balanced, weakly favoring R7 (55% R7 vs 45% R8). Importantly, pale and

239 yellow columns were equally contacted by Dm9 (outputs from R7 and R8: 54% pale vs 46%  
240 yellow; inputs from R7 and R8: 53% pale vs 47% yellow). In total, 8% of the synapses from R7  
241 and R8 to Dm9 were located outside the medulla (34/445 of all R7/8 synapses onto Dm9), on  
242 processes that follow the photoreceptors' axonal projections (Figure 2Bii, arrow).

243 The most strongly connected R7 target cell type was Dm8, a central component of  
244 *Drosophila's* circuitry mediating color vision and wavelength-specific phototaxis (Gao et al.  
245 2008; Melnattur et al. 2014; Pagni et al. 2021). Dm8 has also recently gained interest for  
246 illustrating the developmental mechanisms for determining a cell's fate downstream from a  
247 sensory neuron with a stochastic fate (Courgeon and Desplan 2019). Individual Dm8 cells  
248 cover multiple columns in medulla layer M6 (Gao et al. 2008; Nern, Pfeiffer, and Rubin 2015;  
249 Luo et al. 2020), and extend processes vertically, with one characteristic process usually  
250 reaching higher than the others, up to layer M3, defining the so-called 'home' column for a  
251 given Dm8 cell (Figure 2Ci, arrow). The existence of pale and yellow subtypes of Dm8 cells  
252 with home columns raised the possibility that Dm8 cells may have a center-surround  
253 organization of pale and yellow inputs. In our reconstructions, we therefore analyzed the  
254 connectivity of each Dm8 cell with the surrounding pale and yellow R7 photoreceptors in  
255 relation to its home column.

256 The four R7 cells from our seed columns contacted 16 Dm8 cells altogether, and  
257 individual R7 cells synapsed onto 8 Dm8 cells (mean, range 6-10). Dm8 was exclusively a  
258 target of R7 cells, and there were no synapses from our seed column R8 cells onto Dm8s.  
259 There were five Dm8 cells with processes spanning our seed column R7s and receiving >40  
260 synapses from them. Two of these cells had a pale home column and no input from yellow  
261 seed column R7 cells, and two had a yellow home column and received 13% and 20% of their  
262 from seed column input from pale R7 cells (Supplementary File 1—Dm8 outgoing). The fifth  
263 cell had a pale home column outside the seed column area, and its seed column inputs were  
264 divided evenly, 55% from pale and 45% from yellow. Collectively, these data revealed that  
265 Dm8 cells selectively innervated columns around the home column, but not simply the closest  
266 columns.



267 In view of the importance of Dm8 cells for processing R7 output, we extended our  
268 reconstructions to include all the photoreceptor inputs to three Dm8 cells, one with a pale home  
269 seed column, one with a yellow home seed column, and one with a yellow home column  
270 outside the seed columns (Figure 2Cii). All three Dm8 cells were most densely innervated by  
271 R7s in their home column: the yellow home column cells received 26% and 23% of their R7  
272 input in the home column, and the pale home column cell received 52% (Figure 2Ciii). The  
273 innervated columns outside the home column were not simply the nearest neighbors of the  
274 home column, but formed a more irregular, idiosyncratic spatial pattern. Together, our data are  
275 consistent with Dm8 cells having a central, strong R7 input from either a pale or a yellow cell  
276 in its home column and a surround that integrates spatially varied pale and yellow R7 inputs.

277 Two additional distal medulla cell types, Dm11 and Dm2, were prominent R7 and/or  
278 R8 targets. Dm11 cells tile the medulla in layer M6, with each cell covering ~8 columns (Nern,  
279 Pfeiffer, and Rubin 2015; Figure 2Di), and sending vertical processes that reach far up into the  
280 optic chiasm, tracking the R7 and R8 photoreceptor axons (Courgeon and Desplan 2019;  
281 Figure 2Dii, Diii, arrows). Dm11 was R7-selective, with 87% of its seed column photoreceptor  
282 inputs originating from R7 cells (Figure 2Dii). Two-thirds of the Dm11 seed column R7/8 inputs  
283 were within the optic chiasm (44/63 synapses), and so this was another cell type that was  
284 innervated by photoreceptors much more than previously reported in a medulla FIB-SEM data  
285 set (Figure 1 – figure supplement 2D; Clements et al. 2020; Takemura et al. 2015). One Dm11  
286 cell squarely occupied the four seed columns, receiving 52 synapses from the seed column  
287 photoreceptors, and this cell showed no clear bias for pale or yellow inputs (40% pale, 60%  
288 yellow; Supplementary File 1—Dm11 outgoing).

289 Dm11 is a significant input to Dm2 (Takemura et al. 2015; Clements et al. 2020), a cell  
290 type that is columnar, spans 1-2 columns, and has processes that reach from layer M6 up to  
291 layer M3 to receive synaptic input from R8 cells (Figure 2Ei, Eii; Takemura et al. 2013; Nern,  
292 Pfeiffer, and Rubin 2015). In our seed columns, there were four Dm2 cells that received  
293 photoreceptor input, with 77% from R8 cells (Figure 2Eii) and 81% from pale cells. Three of  
294 the cells were centered on seed columns, with two in the pale seed columns receiving 36 and



295 35 synapses, and the cell in a yellow seed column receiving 18; the fourth cell was centered  
296 on a neighboring yellow column and innervated one of the pale seed columns (Supplementary  
297 File 2—Dm2). In the columns of the medulla FIB-SEM data set that have been identified as  
298 pale and yellow (Menon et al. 2019; see Materials and Methods), Dm2 was also R8-selective  
299 (70% of photoreceptor input from R8; Takemura et al. 2015; Clements et al. 2020). The cell  
300 was missing from one of the pale columns in that data set (Takemura et al. 2015), but in the  
301 columns where it was present, the cells received ~50% more synapses per column in the pale  
302 columns (18 mean, range 16-20 in pale columns, versus 12, mean, range 10-15 in yellow  
303 columns).

304

### 305 Central eye R7 and R8 connections to medulla intrinsic and medulla tangential intrinsic cells

306 The medulla intrinsic (Mi) cells connect the distal with the proximal medulla (Fischbach  
307 and Dittrich 1989). These two zones of the medulla are separated by the serpentine layer M7,  
308 that contains the processes of large medulla tangential cells, some of which are intrinsic to the  
309 medulla (Fischbach and Dittrich 1989). We refer to these medulla intrinsic tangential cells as  
310 Mti cells. The synaptic inputs of R7 and R8 cells to the Mi and Mti cell types proved to be of  
311 particular interest because these connections were depleted in the DRA region, even though  
312 Mi and Mti cell types were also present there (Figure 1H).

313 We found three Mti cells synaptically connected to our seed column R7 and R8 cells,  
314 and we matched these cells to light microscopy images of two separate, previously  
315 undescribed cell types using the locations of cell bodies, sizes of arbors and layer expression  
316 (Figure 3A,B). Both of these cell types received a modest number of synapses from our seed-  
317 column R7 and R8 cells (Mti1: 7 synapses; Mti2: 10 and 2 synapses, respectively;  
318 Supplementary File 1—Mti outgoing), yet were likely to be substantial targets of R7 and R8  
319 cells overall since their processes covered large sections of the medulla (Figure 3A,B). The  
320 first cell type, which we refer to as Mti1, had a cell body located in the cell body layer distally  
321 to the medulla, similar to most medulla neurons. Its processes were asymmetrically oriented  
322 mainly along the dorsoventral axis, with dendrites that occupied layers M3-M6, and axonal

323 processes that spread laterally in layers M7-M8 (Figure 3A). The second cell type, here named  
324 Mti2 (Figure 3B), had cell bodies located at the anterior ventral edge of the medulla, adjacent  
325 to where its processes entered and coursed through layer M7 and to make elaborations in  
326 layer 6 and small, further vertical processes that reached up vertically up to layers M3 and M4  
327 (Figure 3Biii and 3Bvi, arrows). In our EM reconstructions, two cells shared these properties  
328 and overlapped around our seed columns (Figure 3Bv).

329 Mi15 is the only local dopaminergic medulla cell type identified in *Drosophila* so far  
330 (Meissner et al. 2019; Davis et al. 2020). Its morphology and connectivity in the medulla have  
331 been described in previous EM reconstructions (Takemura et al. 2015; Takemura et al. 2013),  
332 and it has a long process that extends into the optic chiasm and tracks photoreceptor axons.  
333 Our reconstruction revealed that this process was a locus of photoreceptor input (Figure 3Cii,  
334 black arrow), and that overall Mi15 cells were R8-selective, with 91% of their seed column  
335 photoreceptor input drawn from R8 cells. The Mi15 cells received 47% of their seed column  
336 photoreceptor input within the chiasm (mean of 15/32 synapses per column; Figure 1 – figure  
337 supplement 2G), and the R8 cells characteristically formed synapses with Mi15 cells at  
338 locations where they also made synapses with R7 cells (Figure 3 – figure supplement 1A).

339 The columnar cell types Mi1, Mi4 and Mi9 are all integral components of the ON-motion  
340 pathway (Strother et al. 2017); prior EM reconstructions have found they receive significant  
341 input from R7 and R8 cells, a result confirmed by our new data (Takemura et al. 2015;  
342 Takemura et al. 2013; Figure 3 – figure supplement 1B-D). In the identified pale and yellow  
343 columns of the medulla FIB-SEM data set, Mi9 was selective for R8 (65% R8 vs 35 R7 input),  
344 and 53% of its photoreceptor input originated from pale R8 cells (Takemura et al. 2015). Our  
345 data reinforced the observation that Mi9 show a bias for R8 input: 68% of our reconstructed  
346 Mi9 input originated from pale seed column R8 cells; the cells in pale columns received 15 and  
347 14 R7/8 synapses, while those in yellow columns received 6 and 4 (Figure 3 – figure  
348 supplement 1D).

349

350 Central eye R7 and R8 connections with cells projecting to the lobula

351 The lobula receives diverse inputs from the medulla, including from cell types types  
352 required for wavelength-specific phototaxis and learned color discrimination (Gao et al. 2008;  
353 Karuppudurai et al. 2014; Melnattur et al. 2014; Otsuna, Shinomiya, and Ito 2014). Many of  
354 these cell types express the histamine receptor *ort*, indicating that they, most notably the  
355 transmedulla (Tm) cell types Tm5a, Tm5b, Tm5c and Tm20 (Gao et al. 2008), receive direct  
356 input from the histaminergic R7 or R8 photoreceptors (Pantazis et al. 2008). We found all of  
357 these Tm cell types in our reconstruction, where they were highly connected with the seed  
358 column R7 and R8 cells, with a mean of 35 seed column photoreceptor inputs per cell for  
359 Tm20, 27 for Tm5a, 23 for Tm5c, and 18 for Tm5b (Figure 4, Figure 4 – figure supplement 1).

360 The cholinergic Tm5a cell type was the first cell type described to show pale vs yellow  
361 selectivity, being preferentially innervated by yellow R7 cells, as revealed by genetic methods  
362 and light microscopy (Karuppudurai et al. 2014). This cell type was identified in the medulla  
363 FIB-SEM data set (Menon et al. 2019) and was used for identifying putative yellow columns  
364 therein (see Materials and Methods). Its medulla processes are centered on one yellow  
365 column, with a single main dendrite from which branches spread laterally reaching some of the  
366 neighboring columns in M3, M6 and M8, and an axon terminating in lobula layer 5B manifesting  
367 a characteristically hooked final reversal of direction at the axon terminal (Gao et al. 2008;  
368 Figure 4A). In both of our yellow seed columns (which we had annotated as being yellow by  
369 the lack of innervation by aMe12), we found a Tm5a cell whose seed column photoreceptor  
370 input was exclusively from the R7 cell in the home column (Figure 4Aiv). Reassuringly, there  
371 were also no Tm5a cells centered on pale columns, or innervated by pale photoreceptors.  
372 Thus the localization of Tm5a cells further supported the designation of our four seed columns  
373 as being either pale or yellow consistent with the assignment based on the presence or  
374 absence of aMe12 vertical processes. One more cell that we refer to as a Tm5a-like had the  
375 morphological features of a Tm5a cell, and was selective for yellow seed column input, but  
376 from R8 cells (Figure 4 – figure supplement 1A). There was no cell with a similar morphology  
377 or connectivity in the medulla FIB-SEM data set, as explored using NeuPrint (Clements et al.  
378 2020). The cell received its R8 input on three different braches of the dendritic arbors,

379 indicating that they were unlikely to have resulted from a reconstruction error (Figure 4 – figure  
380 supplement 1Aiv). Overall, our results confirmed the selectivity of Tm5a cells for yellow  
381 columns and the reliability of finding R7-selective Tm5a cells in yellow columns.

382         The cholinergic Tm5b cell type is similar to Tm5a, but with ~2-3 vertical main dendrites  
383 spanning ~5 columns, from which branches spread laterally in M3, M6 and M8 (Gao et al.  
384 2008; Karuppururai et al. 2014; Meinertzhagen et al. 2009; Figure 4B). A recent analysis of  
385 the medulla FIB-SEM data set has proposed that Tm5b cells are pale-specific (Menon et al.  
386 2019). Our reconstructions revealed two Tm5b cells that were innervated by pale R7, and not  
387 yellow R7 cells (Figure 4B), with only a minor input from seed column R8 cells (19 and 20 R7  
388 inputs, vs 7 and 2 R8 inputs, respectively). We also identified 3 more cells with a morphology  
389 matching the Tm5b cell type, but innervated by predominantly yellow inputs, which we refer to  
390 as Tm5b-like (Figure 4 – figure supplement 1B). In these yellow-specific cells, the input from  
391 R8 photoreceptors dominated, with 9.0 R8 inputs (mean, range 4-16), versus 4.7 R7 inputs  
392 (mean, range 3-7; Figure 4 – figure supplement 1Biv). In particular, one of these Tm5b-like  
393 cells had >20 synapses, and innervated all four seed columns, and was therefore well-covered  
394 by our seed-column-focussed reconstructions (Figure 4 – figure supplement 1B).

395         The Tm5c cells are glutaminergic neurons, spanning ~8 columns with single vertical  
396 dendrite in the medulla, from which lateral branches spread out in M1, as well as M3 and M6,  
397 while the axons terminates near the boundary between lobula layers 5 and 6, often with a  
398 branch in layer 4 (Gao et al. 2008; Karuppururai et al. 2014; Meinertzhagen et al. 2009; Figure  
399 4C); one cell axon terminated deep in layer 6 (Supplementary File 2—Tm5c). Our  
400 reconstructions confirmed that they were indeed selective for R8 input, as indicated by  
401 previous studies (Takemura et al. 2015; Takemura et al. 2013; Karuppururai et al. 2014; Figure  
402 1 – figure supplement 2D). In total, six Tm5c cells were innervated by seed column  
403 photoreceptors, and all of them received many synapses from multiple columns, ranging from  
404 11 to 44 synapses, consistent with R7/R8 input over a large spatial receptive field. One Tm5c  
405 cell was centered on our seed columns, with processes in all of them (Figure 4Cii), and this  
406 cell was only targeted by yellow seed column photoreceptors, predominantly R8. This bias

407 towards yellow R8 inputs was maintained over the population (Figure 4Civ). In the identified  
408 pale and yellow columns of the FIB-SEM data set, there were two Tm5c cells reliably contacted  
409 by R7/8, with > 10 synapses (Takemura et al. 2015; Clements et al. 2020). These two cells  
410 also showed a bias for yellow R8 input, with respectively 18 and 11 synapses from yellow R8  
411 cells, versus 5 and 0 synapses from pale R8 and R7 combined.

412 The Tm20 cell type is a known columnar target of R8 (Takemura et al. 2015; Takemura  
413 et al. 2013; Gao et al. 2008), and the four Tm20 cells located in our seed columns were indeed  
414 selectively connected to R8, confirming this previous result, and further revealed no pale or  
415 yellow selectivity (Figure 4 – figure supplement 1C, Figure 1 – figure supplement 2D). The  
416 Tm20 and Tm5c cell types together received 140 synapses from seed column photoreceptors,  
417 making them two of the most targeted cell types (Table 1). We also found one TmY10 cell that  
418 received 7 synapses from our seed column photoreceptors (Supplementary File 1—TmY10).  
419 In addition we partially reconstructed 10 other Tm cells with a mean of 4.4 photoreceptor  
420 synapses per cell. We did not fully reconstruct these lightly innervated Tm cells; Tm subtypes  
421 may manifest subtle differences in morphology and connectivity that require multiple examples  
422 to distinguish (Jagdish et al. 2014; Gao et al. 2008; Fischbach and Dittrich 1989), which was  
423 beyond the scope of our targeted reconstruction.

424 We found one more prominent cell type that was a seed column photoreceptor target  
425 projecting to the lobula, that we refer to as the medulla-to-lobula cell type ML1, and we  
426 completely reconstructed the morphology of one example (Figure 4D). In addition, we used  
427 light microscopy data to explore the anatomy of the ML1 population (Figure 4Dv-vi). These  
428 cells projected to the deepest layer of the lobula and also to the adjacent central brain, with  
429 cell bodies in the anterior medulla cell body rind (Figure 4Dv), and they were morphologically  
430 similar to a putative *ort*-expressing cell identified by Gao et al. (2008; see their Figure S6). ML1  
431 dendrites covered ~20 medulla columns with overlap, and as a population covered the entire  
432 medulla (Figure 4Dii,vi), ramifying from vertical processes in layers M1-4, and also in M8  
433 (Figure 4Diii,v). Unlike the Tm cells, the ML1 axon exited the distal surface of the medulla and  
434 traveled anteriorly to enter and terminate in or near lobula layer 6 (Figure 4Diii, v, vi), providing

435 an alternative pathway connecting the medulla to the lobula. Light microscopy data suggest  
436 that a fraction of the cells also formed synapses in the central brain, in the posterior lateral  
437 protocerebrum (Figure 4Dvi, arrow). The input to the lobula was non-columnar, and although  
438 it was not retinotopically organized, it was spatially organized, with two axon bundles  
439 originating in the dorsal and ventral medulla terminated in two locations. Our seed columns  
440 contacted four ML1 cells, making an average of 25 synapses per ML1 cell. The cell was  
441 exclusively targeted by R8 cells, from both pale and yellow columns (Figure 4Div).

442

#### 443 Interneurons connecting central eye R7 and R8 with the central brain

444 Nearly 10% of the synapses made by the central seed column R7 and R8  
445 photoreceptors were with cells projecting directly to the central brain. Of these, the strongest  
446 targets were the MeTu cells, which resemble Tm cells, but instead of sending axons to the  
447 lobula, projected to the anterior optic tubercle (AOTU) via the anterior optic tract (Fischbach  
448 and Lyly-Hunerberg 1983; Otsuna, Shinomiya, and Ito 2014; Otsuna and Ito 2006; Omoto et  
449 al. 2017; Timaeus et al. 2020; Tai, Chin, and Chiang 2021; Figure 5A). Our reconstructions  
450 confirmed that MeTu cells were indeed synaptic targets of R7 (Timaeus et al. 2020), and that  
451 their photoreceptor input was exclusively from R7 (Figure 5Aiv). In total MeTu cells received  
452 15% of all the synapses made by the seed column R7 cells (Table 1). We found 7 such  
453 neurons, and reconstructed the complete morphology of one. Their dendrites overlapped and  
454 covered ~20-30 columns (Figure 5Aii), while the axons all targeted the lateral tip of the AOTU  
455 (Timaeus et al. 2020; Omoto et al. 2017; Tai, Chin, and Chiang 2021; Figure 5Ai).

456 The presence of MeTu cells was the largest discrepancy between our list of strong R7  
457 targets and those of the medulla FIB-SEM data set (Clements et al. 2020; Takemura et al.  
458 2015; Figure 1 – figure supplement 2E). In that restricted-volume data set, which focused  
459 mainly on columnar cell types, MeTu cells were not identified. We identified in the FIB-SEM  
460 data set a previously unidentified Tm cell with a morphology matching the MeTu cells that was  
461 an R7 target (Figure 1 – figure supplement 2F). This cell had a connectivity profile that matched  
462 reconstructions named Dm7 in the FIB-SEM data set, with prominent input from R7 and Mi15.

463 We did not identify any Dm7 cells postsynaptic to R7 in our data, and closer inspection of the  
464 Dm7 cells in the FIB-SEM data revealed that these putative Dm7 cells were also  
465 morphologically very similar to MeTu cells in the medulla. We confirmed other details of the  
466 connectivity of our MeTu neurons that were found for the FIB-SEM putative Dm7 neurons  
467 (including strong inputs from Dm2 and Mi15 neurons), and therefore we propose that Dm7  
468 cells in the 7-column data set were most likely MeTu cells, resolving the largest (numerical)  
469 discrepancy between the data sets, and underscoring the benefit of reconstructing even small  
470 circuits in whole-brain EM volumes.

471         Amongst the photoreceptor target cells projecting to the central brain, we identified a  
472 second cell type whose axonal projections follow the anterior axonal tracts of the ML1 neuron,  
473 that we refer to here as ML-VPN1 (Figure 5B). The cell bodies were located near the anterior  
474 proximal medulla, and, based on our match using light-microscopic data, their dendrites  
475 overlapped, with each cell covering tens of columns, collectively covering the medulla (Figure  
476 5Ci-vi). The dendrites ramified along the border of M7 and M8, with vertical processes reaching  
477 up and spreading laterally in M3 and again vertically up to M1 (Figure 5Bii-iii, Ciii). Although  
478 the ML-VPN1 axons followed the ML1 axonal tract, they innervated the posterior lateral  
479 protocerebrum of the ipsilateral hemisphere, in a region just posterior to the optic glomeruli,  
480 and did not form synapses in the lobula (Figure 5Bi, Ci). The ML-VPN1 cells were almost  
481 exclusively targeted by the pale R8 cells, with 8.7 pale R8 inputs per cell (mean, range 5-14),  
482 and just one yellow R8 input across the three cells connected to our seed column  
483 photoreceptors (Figure 5Biv). Light microscopic analyses of co-labelling of ML-VPN1 neurons  
484 with either yellow R8 axons (Figure 5Cvi) or pale R8 axons (Figure 5 – figure supplement 1)  
485 supported the pale preference seen in the EM data: ~90% of columns in which ML1 arbors  
486 and photoreceptors appeared to overlap were pale. Together, our data indicate that ML-VPN1  
487 neurons have a strong bias for pale R8 input.

488         The aMe12 cells were also R8 targets, and the two contacted cells received 15 and 11  
489 R8 synapses, and 2 and 1 R7 synapses, respectively (Figure 1D, Eiii, Supplementary File 1—  
490 aMe12 outgoing). Their axons also targeted the posterior lateral protocerebrum, although in



491 slightly different locations to ML-VPN1, but they did so to both hemispheres (Figure 5D). In  
492 addition, aMe12 cells also projected to the mushroom body calyces of both hemispheres, as  
493 well as to the contralateral and ipsilateral accessory medulla and superior clamp (Figure 5Di,  
494 Dii). All three aMe12 cells shared a characteristic branching pattern, but only one of them  
495 additionally innervated the contralateral accessory medulla (Figure 5Dii). The aMe12 cell type  
496 is present in the hemibrain connectome, where it is also a strong input to  $\gamma$ d Kenyon cells, and  
497 both cells reach the contralateral accessory medulla (Li et al. 2020).

498         There were 5 additional tangential cells projecting to the central brain (Mt-VPNs) that  
499 were targeted by the seed column photoreceptors, collectively receiving 25 synapses (1  
500 neuron in Figure 5E, others in Figure 5 – figure supplement 2). The most targeted cell, which  
501 we refer to as medulla tangential visual projection neuron (Mt-VPN1), had processes in layer  
502 M7, with branches reaching up into layers M5-M6, where it received inputs from both seed  
503 column yellow R7s, and projected an axon to the posterior lateral protocerebrum (Figure 5E).  
504 To check whether it was a preferential target of yellow R7 cells, we traced Mt-VPN1 outside  
505 the seed columns and found that across 20 columns it received input from 13 yellow R7 cells,  
506 and 7 pale R7 cells, indicating it is selective for R7. Our 65% threshold for selectivity applies  
507 to the home columns that equally sample pale and yellow columns, but across 20 columns,  
508 these data did not indicate yellow R7 selectivity, as 62% of all columns were yellow. The  
509 remaining tangential cells included a match to a known octopaminergic neuron (OA-AL2i3;  
510 Busch et al. 2009; Figure 5 – figure supplement 2A). This cell had processes in the distal  
511 medulla in layers M1-M2 as well as processes reaching out into the chiasm which received  
512 photoreceptor input (Figure 5 – figure supplement 2Aii-iii), and an axon that ipsilaterally  
513 innervated the inferior and superior posterior slope, and the flange (Figure 5 – figure  
514 supplement 2Ai). This cell was one of the rare cell types that formed synapses onto  
515 photoreceptors, making 5 synapses onto the R7 and R8 cells, but only in one yellow column  
516 (Supplementary File 1—Mt-VPN). The remaining Mt-VPN cells were very lightly innervated by  
517 the seed column photoreceptors in multiple (Figure 5 – figure supplement 2Cii) and single  
518 columns (Figure 5 – figure supplement 2 Bii, Dii), but may prove to integrate large numbers of



519 photoreceptor inputs as they covered many medulla columns. Collectively they innervated the  
520 ipsilateral superior posterior slope, accessory medulla, and lobula, and in both hemispheres  
521 the inferior posterior slope and lobula plate (Figure 5 – figure supplement 2B-D), and so  
522 revealed multiple pathways for transmitting direct photoreceptor signals into the central brain.

523

524 Synaptic interconnection between R7 and R8 in the DRA and their connections to different  
525 medulla cell types

526 So far, no prior studies have generated EM-based connectomic data for targets of the  
527 polarization-sensitive photoreceptors in the DRA region of the *Drosophila* eye. This section  
528 first presents DRA photoreceptor targets also found in the central reconstructions (Figure 6),  
529 followed by modality-specific Dm cell types strongly connected to DRA inner photoreceptors  
530 while avoiding contacts with non-DRA counterparts (Figure 7), visual projection neurons  
531 directly connecting the DRA with the central brain (Figure 8), and finally more weakly  
532 connected medulla cell types only found in the DRA region of the medulla (Figure 9).

533 As in the central region of the medulla, R7-DRA and R8-DRA axons are strongly  
534 interconnected via chemical synapses. The absolute number of R7-DRA synapses onto R8-  
535 DRA cells are very similar to the numbers found in the central seed columns (13.7 mean, range  
536 10 – 16) accounting for 4.9% (41/837) of total R7-DRA output (as compared to 4.8% (57/1187)  
537 in central seed columns; Figure 6 – Figure supplement 1A, Supplementary File 1). Similarly,  
538 the R8-DRA synapse numbers onto R7-DRA cells are also comparable (36.0 mean, range 33  
539 - 38 in the DRA compared to 39.0 mean, range 36 – 46 in the central eye; Figure 6 – Figure  
540 supplement 1B, Supplementary File 1). However, due to the overall reduced number of R8-  
541 DRA presynapses, the relative proportion of R8-to-R7 synapses is substantially increased  
542 (21.6% of total R8-DRA outputs (108/499), compared to 10.3% (157/1520) in the central  
543 region; Figure 6 – Figure supplement 1C, Supplementary File 1). As in the central region of  
544 the medulla, a considerable proportion of the DRA seed column R8-to-R7 synapses (15%,  
545 16/108, mean 5.3 synapses per cell, range 3-8), and R7-to-R8 synapses (48%, 19/41, mean

546 6.3 synapses per cell, range 4-8) were found in the axonal projection outside the medulla  
547 (Figure 6Ai, arrow).

548 The connectivity between R7-DRA and/or R8-DRA and several lamina and medulla cell  
549 types is comparable to their connectivity of central column photoreceptors, most notably L1,  
550 L3, and Mi1 (Figure 6 – figure supplement 2A-C), whereas others manifest slight differences  
551 in their connectivity between these two seed-column regions. Dm2 cells are primarily R8  
552 targets in central eye columns, but in the DRA, the Dm2 cells receive similar numbers of R7-  
553 DRA and R8-DRA synapses (7.0 mean, range 5 – 10 for R7-DRA, 9.0 mean, range 5 -15 for  
554 R8-DRA synapses per column; Figure 6Bi-iii, Supplementary File 1). These differences in  
555 connectivity of Dm2 between the DRA and the central region confirm light microscopic findings  
556 proposing DRA-specific differences in Dm2 photoreceptor connectivity (Sancer et al. 2020).  
557 Dm9 cells in the DRA also are prominent synaptic target of both inner photoreceptors, while  
558 providing strong synaptic feedback into them (Figure 6C, Table 3, 4). On average, Dm9  
559 receives 31.7 (mean, range 26 – 38) R7-DRA synapses per column, corresponding to 11.3%  
560 (95/837) of R7-DRA's total output (Supplementary File 1). As in the central region, R8-DRA  
561 also is more strongly connected to Dm9, providing an average of 38.3 (mean, range 36 – 43)  
562 synapses, corresponding to 23% (115/499) of its total output. Strikingly, Dm9 and R7-DRA  
563 together account for 44.6% (223/499) of all R8-DRA output synapses (Supplementary File 1).  
564 The absolute number of R7 and R8 inputs to Dm9 per seed column are reduced in DRA seed  
565 columns, when compared to central seed columns (111.2 mean, range 102 – 123 for the  
566 central eye and 70 mean, range 62 – 81 for the DRA; Supplementary File 1). The distribution  
567 of R8 synapses onto Dm9 is different in the DRA, with the greatest density in layer M6,  
568 reflecting the DRA-specific morphology of R8 cells (Figure 6Ci,ii). Past light microscopic  
569 studies suggested that marginal Dm9 cells might receive both DRA and non-DRA inputs  
570 (Sancer et al. 2020), thereby potentially mixing polarization and color information (Heath et al.  
571 2020). To verify these findings, we reconstructed R7 and R8 photoreceptors of three non-DRA  
572 columns which are interconnected with one of the Dm9 cells in the DRA. By partially annotating  
573 photoreceptor synapses from these three non-DRA columns as well as from two DRA columns

574 and the same Dm9 cell, we found that marginal Dm9s indeed receive input from both color and  
575 polarized light sensitive photoreceptors (Figure 6Cvi).

576 As in the central region of the medulla, Mi15 cells are also a significant photoreceptor  
577 target in the DRA where they receive synapses from both R7-DRA and R8-DRA (7 mean,  
578 range 4 – 9 for R7-DRA and 6 mean, range 3 – 10 for R8-DRA; Figure 6Di-iii, Supplementary  
579 File 1). As was the case for Dm2 cells, Mi15 receive more balanced inputs from both  
580 photoreceptor types in the DRA seed columns, while showing a strong preference for R8 inputs  
581 from the central seed columns. Unlike in central columns, where Dm11 cells represent a  
582 significant R7 target, this cell type was found in only one DRA seed column, receiving minor  
583 and again balanced input from both R7 and R8 in the DRA region (4 from R7-DRA and 8 from  
584 R8-DRA; Figure 6 – figure supplement 2D, Supplementary File 1). Only two additional  
585 columnar cell types appear to be connected to photoreceptors with more than 2 synapses  
586 throughout all three DRA seed columns - Mi9 and Tm20. Both cell types are specifically  
587 connected to R8-DRA cells, although much more weakly connected than their central  
588 counterparts (Mi9: 4 mean, range 0 – 9 for R8-DRA and 6.5 mean, range 0 – 14 for the central  
589 eye R8; Tm20: 5.3 mean, range 4 – 8 for R8-DRA and 33 mean, range 30 – 35 for the central  
590 eye R8; Supplementary File 1). Mi9 cells receive only 4 (mean, range 0 – 9) synapses per  
591 seed column from R8-DRA (and none from R7-DRA) but otherwise showed no obvious  
592 morphological differences compared to their central eye counterparts (Figure 6 – figure  
593 supplement 2E, Supplementary File 1). Interestingly, Tm20 cells were the only Tm cell type  
594 connected to DRA inner photoreceptor cells present in all DRA seed columns with 5.3 (mean,  
595 range 4 – 8) synapses per column from R8-DRA (and zero from R7-DRA; Figure 6Ei-iii,  
596 Supplementary File 1). Only one other Tm cell (referred here as Tm5-like) was found to be  
597 strongly connected, with 12 synaptic inputs from both R7-DRA and R8-DRA inputs, albeit only  
598 being present in one of the three DRA columns (Figure 6 – figure supplement 2F).

599

600 Dm8-like photoreceptor targets in the DRA region

601           The strongest target of R7-DRA cells is the Dm-DRA1 cell type (Sancer et al. 2019). A  
602 total of 20 Dm-DRA1 cells receive on average 70.1 (mean, range 66 -77) synapses per DRA  
603 seed column, corresponding to 25.3% (212/837) of total R7-DRA output (Supplementary File  
604 1). No synaptic inputs from R8-DRA were detected in the three seed columns, despite R8-  
605 DRA terminating in close proximity of R7-DRA (Figure 7A). Consistently, synaptic inputs from  
606 R7-DRA to Dm-DRA1 are tightly restricted to the proximal edge of layer M6 where R8-DRA  
607 are not present (Figure 7Ai, Aii). Although Dm-DRA1 cells have been proposed to be the DRA-  
608 specific equivalents of Dm8 (Courgeon and Desplan 2019), we never detected vertical  
609 protrusions resembling Dm8 'home columns' in Dm-DRA1 cells. As previously described, Dm-  
610 DRA1 cells have deep projections that leave the DRA and stratify below layer M6, and these  
611 do not receive strong photoreceptor input (Figure 7Aiii, compare light-microscopic clone in  
612 7Aiv). Few synapses were found in non-DRA columns close to the DRA (Figure 7 – figure  
613 supplement 1A, Supplementary File 1). Only one of these R7 cells made a comparably high  
614 number (11 synapses) onto the posterior Dm-DRA1 cell. This photoreceptor could be an R7-  
615 DRA cell (despite R8 in the same column terminating in M3), since inner photoreceptors  
616 choose DRA fates independently. As a result, low numbers of such 'mixed' ommatidia can be  
617 found at the DRA/non-DRA boundary of virtually every fly retina (Wernet et al. 2003; Wada  
618 1974b). Outside the DRA, deep projections of Dm-DRA1 cell branches didn't show any clear  
619 preference for occupying either pale or yellow columns (Figure 7 – figure supplement 2).

620           As in the case of Dm8 cells, we took the additional step of identifying all the DRA  
621 photoreceptor inputs to three fully traced Dm-DRA1 cells, in order to gain a better  
622 understanding of the synaptic connectivity pattern (or distribution) between DRA  
623 photoreceptors and these cell types (Figure 7B). Each of the fully traced Dm-DRA1 cells is  
624 connected to an average of 9 (mean, range 8 – 10) neighboring R7-DRA cells, receiving on  
625 average a total of 94 synapses (mean, range 66 – 112) from R7-DRA, but very few connections  
626 from R8-DRA cells (only observed for the posterior DmDRA1 where 2 R8-DRA cells form 3  
627 respectively 2 synapses; Figure 7Bi, Supplementary File 1). Synapse numbers across the  
628 cells' DRA backbone resembled a ~50  $\mu$ m contiguous stretch of inputs from neighboring

629 columns, with stronger input in the center, but without a single, obvious home column (Figure  
630 7Bii, Figure 7 – figure supplement 3).

631 R8-DRA Photoreceptors from the three seed columns made an average of 34.3 (mean,  
632 range 19 – 44) synapses with a total of 9 different Dm-DRA2 cells (Sancer et al. 2019;  
633 Supplementary File 1). Based on our prior descriptions, and confirmed here, each Dm-DRA2  
634 cell has multiple characteristic vertical projections (Figure 7Ci), whose length is highly variable,  
635 but are on average much longer than the singular vertical processes observed in Dm8 home  
636 columns. Dm-DRA2 vertical projections are also a striking feature of light microscopic clones  
637 (Figure 7Civ), and they received synaptic input from R8-DRA cells (Figure 7Cii, Ciii). As with  
638 the Dm-DRA1 cells, we fully reconstructed three Dm-DRA2 cells so as to quantify the pattern  
639 of their photoreceptor inputs. They are innervated by an average of 9.3 (mean, range 8 – 11)  
640 R8-DRA photoreceptors and receive minor inputs from R7-DRA (3.7 mean, range 3 – 4 R7-  
641 DRA per DmDRA2 with an average of 5.3, range 3 – 7 synapses; Figure 7D, Supplementary  
642 File 1). The distribution of R8-DRA inputs into each Dm-DRA2 cell again resembled a ~50  $\mu$ m  
643 contiguous stretch with a peak in its center and without an obvious home column (Figure 7Di,  
644 Dii). Thus, both the Dm-DRA1 and Dm-DRA2 cell types directly integrate photoreceptor input  
645 over multiple columns, with a dominant input at the center of their receptive field. In agreement  
646 with previous light microscopic data (Sancer et al. 2019), both Dm-DRA1 and Dm-DRA2  
647 skeletons heavily overlap with each other, all along the DRA (Figure 7Ei, Eii). The population  
648 of all Dm-DRA1 cells connected to the same R7-DRA seed photoreceptor (8.3 mean, range 6  
649 - 11) on average spans on average 17 DRA columns (mean, range 13 - 19), which can  
650 correspond to just under half the DRA. In comparison, both the number of Dm-DRA2 targets  
651 of one single seed R8-DRA photoreceptor was lower (3.3 mean, range 2 – 5 Dm-DRA2 cells  
652 per column), and the DRA area covered by them was a smaller span of the DRA, with an  
653 average of 10.7 columns (mean, range 10 -12). It appears therefore that more Dm-DRA1 cells  
654 than Dm-DRA2 cells populate the DRA region of the medulla, given that these cells contact  
655 similar numbers of DRA inner photoreceptors (9.0 versus 9.3, respectively – see above).  
656 Finally, direct comparison of inputs into Dm-DRA1 and Dm-DRA2 from the same location along

657 the DRA reveals a separation of DRA-R7 and R8-DRA synapses into different sublayers of M6  
658 (Figure 7Eiii), corroborating light microscopic observations (Sancer et al. 2019).

659

#### 660 Visual projection neurons directly connecting R7-DRA to the central brain

661 The second most prominent R7-DRA target after Dm-DRA1 cells is a previously  
662 unidentified cell type that we refer to as MeTu-DRA (Figure 8Ai). These cells are modality-  
663 specific, as they exclusively receive R7-DRA photoreceptor inputs, but get no input from R8-  
664 DRA. Both the reconstructed skeletons, as well as the corresponding light microscopic clones  
665 of MeTu-DRA cells (Figure 8Aii), feature long axons projecting to the small unit of the AOTU,  
666 identifying them as specialized MeTu cells (Omoto et al. 2017; Panser et al. 2016; Otsuna,  
667 Shinomiya, and Ito 2014; Tai, Chin, and Chiang 2021). They closely resemble cells described  
668 in the DRA region of optic lobes from larger insects (Pfeiffer and Kinoshita 2012; el Jundi,  
669 Pfeiffer, and Homberg 2011). A total of 30 reconstructed MeTu-DRA cells receive an average  
670 of 61.3 (mean, range 49 – 85) R7-DRA synapses per seed column, corresponding to 22.0%  
671 (184/837) of the total R7-DRA output (Figure 8Aiii and 8Aiv, Supplementary File 1). As in the  
672 case of Dm-DRA1, synapses from R7-DRA onto MeTu-DRA cells are restricted to the  
673 photoreceptor tips at the proximal edge of layer M6 (Figure 8Aiv). Outside the DRA region,  
674 MeTu-DRA cells form additional processes innervating the dorsal medulla (Figure 8Av).  
675 However, these processes appear to avoid non-DRA photoreceptor contacts by stratifying  
676 below M6, in a manner reminiscent of the Dm-DRA1 deep projections (Sancer et al. 2019).  
677 Again, these processes show no obvious preference for pale or yellow columns (Figure 8 –  
678 figure supplement 1A). To confirm their modality-specific connectivity to photoreceptors of the  
679 DRA and not the central region, we visualized single MeTu-DRA cell clones in the DRA and  
680 indeed found their photoreceptor contacts were always restricted to the DRA (Figure 8Avi).  
681 The medulla dendrites of all MeTu-DRA skeletons connected to the same R7-DRA seed  
682 photoreceptor (11.3 mean, range 8 – 16) widely overlap along the DRA, covering 15 DRA  
683 columns on average (mean, range 12 – 17; Figure 8vii). Since the axons of the central region  
684 MeTu cells projected to a discrete subdomain of the small unit of the AOTU (Figure 5Ai), we



685 assessed whether they intermixed with MeTu-DRA terminals. Interestingly, both MeTu-DRA  
686 and the other MeTu cells we reconstructed from centrally located seed columns, terminate in  
687 separate, adjacent AOTU compartments (Figure 8vii, inset).

688 Besides the MeTu-DRA cells we found one additional, previously uncharacterized cell  
689 type directly connecting the DRA with the central brain, which we refer to as VPN-DRA.  
690 Individual skeletons of EM-reconstructed neurons, as well as light microscopic clones for a  
691 corresponding cell type we identified, populate the DRA and send axonal projections to a  
692 specific central brain region, the posterior lateral protocerebrum (PLP; Figure 8Bi, Bii). There  
693 are 6 VPN-DRA cells with >2 synapses contacted by the DRA seed columns and they received  
694 an average of 10 (mean, range 6 – 13) DRA synapses per seed column (corresponding to  
695 3.6%, 30/837, of total R7-DRA output), with no input from R8-DRA cells (Figure 8Biii, Biv,  
696 Supplementary File 1). The backbone of VPN-DRA skeletons follows the DRA, while smaller  
697 branches infiltrated non-DRA columns (Fig 8Bv). Double labeling of a driver line with apparent  
698 VPN-DRA expression with photoreceptor neurons suggests that VPN-DRA cells might be  
699 modality-specific, although fine processes can be seen in close contact with non-DRA  
700 photoreceptors as well (Figure 8Bvi). VPN-DRA cells form an overlapping group of neurons  
701 covering the entire DRA region of the medulla of a given hemisphere with projections to the  
702 PLP (Figure 8Bvii). Some morphological heterogeneity appears to exist within the VPN-DRA  
703 population, with some cells having additional processes, both in the medulla, as well as in the  
704 central brain and a different cell body position (Figure 8 – figure supplement 1B), indicating  
705 that VPN-DRA cells might consist of distinct subtypes.

706

#### 707 Other newly identified photoreceptor targets in the DRA region of the medulla

708 We identified two previously uncharacterized DRA cell types that received  
709 photoreceptor input in the seed columns. The first cell type, which we named MeMe-DRA,  
710 consists of two large heterolateral medulla cells that connected the DRA areas of both  
711 hemispheres (Figure 9Ai), crossing the central brain without forming synapses there. These  
712 cells resemble the polarization-sensitive MeMe1 cells characterized in locusts (el Jundi,

713 Pfeiffer, and Homberg 2011; El Jundi and Homberg 2010), and we were able to match their  
714 morphology to that of a cell type using light microscopy (Figure 9Av). We reconstructed two  
715 MeMe-DRA cells (and could not find additional ones), both being exclusively innervated by R7-  
716 DRA cells in all three seed columns, receiving on average 12.0 (mean, range 0 – 21) synapses  
717 per seed column, corresponding to 4.9% of total R7-DRA output (Figure 9Aiii-iv,  
718 Supplementary File 1). The putatively dendritic part of a MeMe-DRA skeleton (located within  
719 the hemisphere that contained the cell body) follows the DRA (Figure 9Aiv) and appears to  
720 receive DRA modality-specific photoreceptor input, based on light microscopic labeling, with  
721 processes reaching layer M6 exclusively in the DRA region of the medulla (Figure 9Av).  
722 Interestingly, the DRA areas contacted by a given cell is flipped along the anterior-posterior  
723 axis between the two hemispheres, so that the anterior half of one is directly connected to the  
724 posterior half in the other hemisphere, and vice versa (Figure 9Avi).

725 Another newly identified group of cells we found as DRA photoreceptor targets is a  
726 population of morphologically diverse Mti cells covering the dorsal medulla (Figure 9B,C,  
727 Figure 9 – figure supplement 1), for which we also found light microscopy matches. A total of  
728 10 of these Mti-DRA cells are all innervated exclusively by R7-DRA, but fall into two distinct  
729 morphological populations, named here Mti-DRA1 (Figure 9Bi-Bv) and Mti-DRA2 (Figure 9Ci-  
730 Cv). A total of six Mti-DRA1 cells have ventrally located cell bodies (Figure 9Bi) and receive  
731 on average 17.3 (mean, range 13 – 21) synapses per seed column, corresponding to 6.2% of  
732 total R7-DRA output (Figure 9Biii, Supplementary File 1). Individual reconstructed Mti-DRA1  
733 skeletons form a backbone that covers the DRA columns with short processes leaving the  
734 DRA region (Figure 9Biv - 9Bv). Mti-DRA2 cells have dorsally located cell bodies (Figure 9Ci)  
735 and are more weakly connected to R7-DRA photoreceptors, with four Mti-DRA2 neurons  
736 making 5 (mean, range 3 – 8) synapses per seed column, corresponding to 4.4% and 1.8% of  
737 R7-DRA total output, (Figure 9Cii, Ciii – figure supplement 1, Supplementary File 1). The  
738 backbones of Mti-DRA2 skeletons also cover the DRA but form longer processes extending  
739 further ventrally (Figure 9Civ, 9Cv).

740



741 Comparison of R7/R8 connectivity in the central eye versus the DRA region

742 Taken together, our reconstructions of the synaptic targets of R7 and R8  
743 photoreceptors specialized for color versus polarization vision revealed specific stereotypical  
744 similarities, as well as striking differences. The pattern of connectivity between R7 and R8  
745 terminals from the same ommatidium, and with Dm9, was highly congruent in columns  
746 processing color and polarization, indicating that the mechanisms of lateral inhibition between  
747 photoreceptors and gain modulation by Dm9 can serve both modalities (Schnaitmann et al.  
748 2018; Weir et al. 2016; Heath et al. 2020; Figure 10A).

749 A second striking similarity was the location of synapses located outside the medulla  
750 (Figure 1 – figure supplement 2G). In both the central and DRA columns, more than half of the  
751 R7 to R8 synapses and the inputs to the lamina cells L1 and L3 were made outside the medulla  
752 (Figure 1 – figure supplement 2G, Figure 2 – figure supplement 1, Figure 6 – figure supplement  
753 1A,B). In both cases, the strongest lamina monopolar target was L3, receiving 80% of its R7/R8  
754 inputs within the chiasm (Figure 2 – figure supplement 1C, Figure 6 – figure supplement 1B).  
755 L3 is known to contribute to color processing through innervation of Dm9, Tm20, and Tm5c  
756 (Takemura et al. 2015), in addition to the ON and OFF pathways computing motion (Silies et  
757 al. 2013). These lamina monopolar cells, combined with weaker connections from R7/R8 onto  
758 C2 cells (Figure 2 – figure supplement 1D), provide a source of cross-talk between channels  
759 informing color-specific (R7/R8) and motion-sensitive (R1-6) channels (Tuthill et al. 2013),  
760 which previously had been believed to operate separately (Heisenberg and Buchner 1977;  
761 Yamaguchi et al. 2008). Subsequent data seemed to contradict these findings, (Wardill et al.  
762 2012; Schnaitmann et al. 2013; Wernet et al. 2012; Pagni et al. 2021), and our reconstructions  
763 provide further support for the convergence of these channels at early stages within the optic  
764 lobe circuitry (Takemura et al. 2013).

765 When comparing connections to Dm cell types (Figure 10B), we confirmed that in the  
766 DRA, both R7 and R8 cells connect to their own amacrine-like cell type (the Dm-DRA), as  
767 previously proposed using light microscopy (Sancer et al. 2019). Such connections never  
768 occur in the central seed columns, where only R7 connects to the amacrine cell type Dm8. As

769 for central R8, the much smaller Dm2 cells are the strongest biased/specific target of R8. Since  
770 recent studies point towards Dm-DRA1 (as target of R7-DRA) and Dm8 cells being  
771 developmentally similar (Courgeon and Desplan 2019), it remains to be seen whether Dm-  
772 DRA2 represent a duplication of Dm8 fates in the DRA (where orthogonal e-vector orientations  
773 presumably are processed downstream of R7 and R8). Alternatively, these cells could be  
774 developmentally similar to Dm11 cells (sharing morphological similarities, like numerous, long  
775 vertical projections per cell), which we identify here as R7 target cells in the central seed  
776 columns, while being only present in one of the three DRA seed columns (Figure 6 – figure  
777 supplement 1E).

778         When comparing R7/R8 connections to Mi cell types, it becomes apparent that many  
779 of these connections (Mi1, Mi4, Mi9) are much weaker or completely missing in the DRA region  
780 (Figure 10C). Given their important role in the computation of motion (Strother et al. 2017), this  
781 could indicate more strict separation between computations of motion and polarization, as  
782 compared to motion and color. In contrast, Mi15 cells – for which no role in motion vision has  
783 been reported - appear to be targeted by both central and DRA inner photoreceptors. The role  
784 of Mi15 remains yet to be determined, but its dopaminergic fate (in addition to other  
785 transmitter/modulator signatures) suggests a modulatory role (Davis et al. 2020). We  
786 reconstructed morphologically different Mti cells both from central and DRA columns, which  
787 might collect input from large numbers of photoreceptors. While the Mti cells are strong R8  
788 targets in the central columns (Figure 3A,B), they are targets of R7 in the DRA (Figure 10C).  
789 Interestingly, R7-DRA photoreceptors provide significantly stronger input per seed column into  
790 Mti-DRA cells, which could be due to the relatively low number of DRA ommatidia per  
791 hemisphere (42, as determined here from FAFB).

792         One of the most striking results of our reconstruction is the virtually complete lack of  
793 lobula targeting neurons receiving photoreceptor connections in the DRA region (Figure 10D).  
794 While our reconstruction identifies and confirms the Tm5a, Tm5b, Tm5c, and Tm20 cells as  
795 known targets of central R7 or R8 (Meinertzhagen et al. 2009; Gao et al. 2008; Melnattur et al.  
796 2014), the lack of synaptic connections with these cell types in the DRA corroborates the

797 results of a previous light microscopic study (Sancer et al. 2020). In addition to Tm cells, we  
798 identify the new cell type ML1, also connecting the medulla to the lobula but without the precise  
799 retinopy of the Tm cell arrays and with additional branches in the central brain (Figure 10Dii).  
800 This lack of Tm and ML1 connectivity in the DRA is reflected in the overall lower number of  
801 R8-DRA synapses (Table 3).

802 Central R7 and R7-DRA cells are strongly connected to different classes of MeTu cells,  
803 which form long axons terminating in spatially segregated areas of the small unit of the AOTU  
804 (Figure 10E). Previous studies proposed that different kinds of visual information may be  
805 processed by distinct parallel pathways leading towards the central brain via the AOTU  
806 (Otsuna, Shinomiya, and Ito 2014; Omoto et al. 2017; Timaeus et al. 2020; Tai, Chin, and  
807 Chiang 2021). Our reconstructions support this hypothesis, showing different target regions for  
808 these 2 putative MeTu types, and functional measurements confirm that the target area of  
809 MeTu-DRA cells shows polarization-sensitive responses (Hardcastle et al. 2021). While some  
810 studies suggest a potential role of central MeTu cells in wavelength-specific behaviors  
811 (Otsuna, Shinomiya, and Ito 2014), the full diversity of the MeTu subtypes and the exact role  
812 of specific subtypes remain incompletely understood.

813 Besides the AOTU, cell types postsynaptic to central eye and to DRA ommatidia both  
814 project directly to the PLP, but otherwise show little overlap in the central brain areas they  
815 project to (Figure 10F). The additional contacts of DRA projection neurons are focused to the  
816 lateral horn and the contralateral medulla, while the central eye projection neurons innervate  
817 widely across the central brain, including the mushroom bodies, and the contralateral lobula  
818 plate. A key modality-specific adaptation of the visual projection neurons is the dominance of  
819 R8 input in the central eye, and R7 in the DRA.

820

## 821 **Discussion**

822 Our systematic reconstruction of all synaptic inputs and outputs of identified,  
823 functionally specialized *Drosophila* R7 and R8 photoreceptors (pale, yellow and DRA),  
824 provides a complete and comprehensive catalog of the first steps of the color and polarization

825 pathways, from which all of the computations of the dependent behaviors stem. These data  
826 revealed core connectomic motifs shared across columns types (Figure 10A-C), multiple new  
827 photoreceptor targets, and uncovered additional cell types as being connected to specific  
828 photoreceptor subtypes conveying specific color and polarization information to the central  
829 brain (Figure 10E,F).

830

### 831 R7 and R8 connections outside the medulla neuropil

832 We confirmed previously reported synaptic partners of R7 and R8 photoreceptors in  
833 the central medulla (Figure 1-supplement 2) and also identified new photoreceptor targets,  
834 discussed below. As prior reconstructions were incomplete (Takemura et al. 2015), it was  
835 unclear whether the unidentified connections were mainly onto new target neurons, or  
836 represented more connections onto known cell types. Our reconstructions revealed both types  
837 of omissions. One functionally important set of missed connections are the synapses between  
838 R7 and R8 cells from the same central and DRA ommatidia, which we found to be stronger  
839 than previously reported (Takemura et al. 2015; Takemura, Lu, and Meinertzhagen 2008), due  
840 to significant numbers of synapses outside the medulla. These strong reciprocal connections  
841 likely contribute to color-opponent responses seen in central R7 and R8 terminals  
842 (Schnaitmann et al. 2018) and the polarization-opponent signals measured from DRA  
843 photoreceptors (Weir et al. 2016). Our reconstructions also support a larger scale opponent  
844 process mediated by multi-columnar Dm9 cells (Heath et al. 2020), which also formed some  
845 synapses outside the medulla neuropil.

846 Other cell types also received inner photoreceptor input outside the medulla, notably  
847 the lamina monopolar cells L1 and L3, indicating that chromatic comparisons arising from R7  
848 and R8 may feed into the motion vision pathway. This identifies a new site for interplay between  
849 the 'color' and 'motion' pathways; such interplay is thought to also occur in the opposite  
850 direction, for example between Mi1, a prominent motion pathway neuron, and Dm8 cells, a  
851 major R7 target (Pagni et al. 2021). Together, these observations suggest that synapses in an

852 unexpected location, outside the main synaptic layer of the medulla, could play a significant  
853 role in early visual processing.

854

#### 855 Newly identified targets of central versus DRA R7 and R8

856 We identified several cell types either not previously described, or not known to be  
857 connected to inner photoreceptors, thus setting up a clear expectation that these cells should  
858 contribute to color or polarization vision. We identified ML1 cells as a new, major target of R8,  
859 a cell type that connects medulla and lobula via a previously unknown, non-columnar pathway  
860 (Figure 4D, Figure 10 Aii). Due to their central brain synapses, ML1 cells might be best  
861 considered as a class of visual projection neurons that also have arbors in the deepest layer  
862 of the lobula. Our identification of multiple Tm cell types post-synaptic to central R7 and R8  
863 support the proposals of previous studies that chromatic signals are further processed in the  
864 lobula (Lin et al. 2016; Gao et al. 2008). Whether these Tm neurons and ML1 cells have  
865 common targets in the lobula, feed into shared central pathways or contribute to separate  
866 channels will require further study; we note that the lobula arbors of the Tm and ML1 cells are  
867 mostly in different layers arguing against direct synaptic interactions between the cells. By  
868 contrast, cells projecting to the lobula are strikingly absent in DRA columns (Figure 10D).

869 In the central medulla, we find, for the first time in an EM study, strong synaptic  
870 connections between R7s and MeTu cells that project to the AOTU (Figure 11Ai), confirming  
871 previous claims based on light microscopy (Timaeus et al. 2020). This finding may reconcile  
872 disparate observations, such as a role in wavelength-specific phototaxis for cells matching  
873 MeTu morphology (Otsuna, Shinomiya, and Ito 2014), as well as measurements of color-  
874 sensitive signals in the AOTU (Mota et al. 2013) of bees. Previous anatomical studies  
875 partitioned MeTu cells into distinct subclasses that terminate in discrete subdomains of the  
876 AOTU (Omoto et al. 2017; Timaeus et al. 2020; Tai, Chin, and Chiang 2021). Here we identified  
877 modality-specific MeTu-DRA cells that only integrate from the polarization-sensitive R7-DRA  
878 photoreceptors, while avoiding synaptic contacts with color-sensitive pale or yellow R7s. We  
879 find that MeTu and MeTu-DRA cells target adjacent subdomains within the small unit of the

880 AOTU (Figure 10E), in agreement with proposals that parallel channels convey different forms  
881 of visual information from the eye to the central complex via the AOTU (Hardcastle et al. 2021;  
882 Hulse et al. 2020; Timaeus et al. 2020; Omoto et al. 2017).

883 The reconstruction of DRA photoreceptor targets identified both Dm-DRA cell types  
884 that were described using light microscopy (Sancer et al. 2019), and confirmed their specific  
885 connectivity within layer M6: Dm-DRA1 cells are connected almost exclusively to R7-DRA  
886 cells, whereas Dm-DRA2 cells are R8-DRA targets. Since R7-DRA and R8-DRA, at each  
887 location of the DRA, maximally respond to orthogonal orientations of polarized light, we  
888 therefore expect that Dm-DRA1 and Dm-DRA2 process orthogonal e-vector orientations, that  
889 are spatially averaged by pooling over ~9 neighboring ommatidia (Weir et al. 2016). Our data  
890 also revealed additional DRA pathways into the PLP in the central brain via VPN-DRA cells,  
891 as well as to the contralateral DRA, via MeMe-DRA cells (Figure 10F). Such interhemispheric  
892 connections have been demonstrated in larger insects (el Jundi, Pfeiffer, and Homberg 2011;  
893 Labhart 1988), but not in *Drosophila*, and their synaptic input was not known. Interactions  
894 between the DRAs of the two eyes remain poorly understood, although interocular transfer  
895 was shown to occur in desert ants navigating only when using celestial polarization, but not  
896 when using landmarks (Wehner and Muller 1985). The MeMe-DRA neurons identified here  
897 now provide one potential substrate for understanding this phenomenon at a cellular and  
898 synaptic level.

899

#### 900 Cell types distinguishing between pale and yellow inputs

901 The fly's retinal mosaic can support circuits with different chromatic sensitivities by  
902 selective sampling of pale and yellow photoreceptors. For example, cells contrasting pale and  
903 yellow R7 input would be expected to have high chromatic sensitivity around ~350 nm, where  
904 the spectral sensitivity of Rh3 and Rh4 overlap (Salcedo et al. 1999). Our reconstructions  
905 revealed several cases of connectivity patterns that could support such selective sampling. For  
906 R7, these included two cell types previously reported to be pale/yellow selective: Tm5a for  
907 yellow R7 input (Karuppudurai et al. 2014), and Tm5b for pale R7 (Menon et al. 2019; Figure

908 11Bi). By, for the first time, completely reconstructing several Dm8 cells (Figure 2C), we found  
909 that Dm8 neurons were most highly innervated by R7 in their home columns, with equal  
910 sampling of pale and yellow R7 input in the surrounding columns, an organization consistent  
911 with pale and yellow Dm8 subtypes (Menon et al. 2019, Courgeon and Desplan 2019). Unlike  
912 in the DRA, there were no cells projecting to the central brain that were substantial targets of  
913 R7. Examining the encoding of chromatic signals in Tm5a/b and Dm8 cells, and their other  
914 synaptic partners, is therefore a promising avenue for addressing the open question of how,  
915 or if, UV information from yellow ommatidia is processed differently from UV signals  
916 downstream of pale R7 cells.

917 We found more pale/yellow selective cells among the R8 targets. Two visual projection  
918 neurons were newly identified as selective for pale R8 input, the aMe12 and ML-VPN1 cells.  
919 ML-VPN1 provides input to the PLP, while aMe12 has presynaptic sites in the accessory  
920 medulla, the PLP, and the mushroom body, where it provides input to  $\gamma$ d Kenyon cells (Li et al.  
921 2020; Scheffer et al. 2020). These connectivity patterns suggest roles in circadian entrainment  
922 and learning and memory, respectively (Figure 11Bii). *Drosophila* pale R8 cells are most  
923 sensitive to blue wavelengths (Sharkey et al. 2020; Salcedo et al. 1999; Schnaitmann et al.  
924 2018; Heath et al. 2020), and the projections of aMe12 and ML-VPN1 demonstrate that blue  
925 light is processed and used by the central brain within one synapse. Little is known about the  
926 central processing of color in *Drosophila* (Longden 2016), but the detection of blue light plays  
927 an important role in the circadian avoidance of bright light (Lazopulo et al. 2019). Flies can also  
928 learn to discriminate between large areas of blue and green light and a group of visual  
929 projection neurons have been reported to provide to provide input to  $\gamma$ d Kenyon cells and be  
930 required for this ability (Vogt et al. 2014).

931 While near perfect specificity for pale versus yellow inputs appears to be limited to a  
932 few cell types, several strongly connected cell types show strongly biased inputs: For example,  
933 Dm2 favors pale over yellow R8 (60:15), and Tm5c favor yellow over pale R8 (103:20) a result  
934 that corroborates and extends the findings of the 7-column medulla connectome. Individual  
935 cells, in particular Tm20 neurons, that span just one column, are also constrained to be



936 selective for pale and yellow photoreceptor input. Such selectivity could in principle be  
937 exploited at the level of the synaptic targets of these neurons. Surprisingly, Mi9 cells, another  
938 cell type present in every column of the eye, also revealed strong pale/yellow biases in our  
939 reconstructions, both with R7 inputs (3:9), as well as R8 inputs (26:1). Given the known role of  
940 Mi9 in shaping direction-selective responses on T4 dendrites (Strother et al. 2017; Takemura  
941 et al. 2017), these data identify yet another level of crosstalk between chromatic and motion-  
942 sensitive channels. Overall, it is an unexpected finding that most projections from the medulla  
943 to the lobula from photoreceptor target neurons convey biased pale/yellow inputs. These  
944 differences could mediate much broader effects of pale/yellow differences in medulla and  
945 lobula circuits than currently appreciated, or these specializations could be blunted by  
946 combinations at the next synaptic layer.

947

#### 948 Limitations of our approach

949 By focusing on a small number of columns, we have delivered a very complete picture  
950 of local connectivity, but we cannot rule out the possibility that certain cell types may have  
951 been overlooked. For instance, we chose an arbitrary threshold of 2-3 synapses below which  
952 we did not endeavor to reconstruct synaptic targets to the extent required to uniquely identify  
953 them. This threshold may, in principle, have missed large cells that receive small, but  
954 significant inputs across many columns. Furthermore, we cannot rule out regional  
955 specializations in the eye, such that specific cell types might be found outside of our seed  
956 columns. For example, some MeTu cells are only found in the dorsal third of the medulla  
957 (Omoto et al. 2017; Otsuna, Shinomiya, and Ito 2014), where incoming R7 cells are known to  
958 co-express Rh3 and Rh4 Rhodopsins (Mazzoni et al. 2008).

959

#### 960 Complementary usage of multiple connectomic data sets and outlook

961 Taken together, the data presented here provides access to the full complement of R7  
962 and R8 photoreceptor targets from functionally specialized optical units. By reconstructing  
963 these local circuits within a full-brain EM volume, we were able to establish the complete



964 morphology of large, multi-columnar cell types, that are strongly connected to photoreceptors,  
965 but had eluded previous connectomic reconstruction efforts (Takemura et al. 2015; Takemura  
966 et al. 2013). The sparse tracing approach we have implemented and described here allowed  
967 for the relatively efficient identification of the complete set of upstream and downstream  
968 partners of the inner photoreceptors, in a manner that is complementary to the dense  
969 connectomes generated from smaller-scale medulla volumes. As an example of this  
970 synergistic use of complementary data sets, we have returned to the 7-column data (Takemura  
971 et al. 2015; Clements et al. 2020) and used our whole-cell morphologies to match the bodies  
972 of previously unidentified photoreceptor targets. In that process we have established strong  
973 candidates for MeTu, ML1, and perhaps for aMe12 (see Materials and Methods) and confirmed  
974 several aspects of their connectivity in FAFB. In so doing, we now have access to the additional  
975 connectivity data provided by this dense reconstruction. While full exploration and follow-up  
976 analyses of these combined data is beyond the scope of this work, the FIB-SEM/FAFB  
977 combination revealed several intriguing connectivity patterns, including new candidate paths  
978 for the integration of output from different photoreceptor types. For example, the MeTu cells  
979 that are postsynaptic to R7 also receive indirect R8 input via the R8 target Mi15, and ML1  
980 combines direct R8 input with indirect input from outer photoreceptors via lamina neurons. As  
981 further connectome data sets are completed, this comparative interplay between data sets with  
982 unique advantages and limitations, will be an important step in both cross-validating and  
983 extending the applicability of all related data sets.

984 Our reconstruction of the DRA photoreceptor targets provides the first EM-based  
985 connectomic dataset for modality-specific cell types likely to process skylight information in  
986 any insect, and will be important for developing refined models of skylight navigation (Gkaniias  
987 et al. 2019). Core motifs shared between DRA and central eye columns such as opponency  
988 are prime candidates for the computation of visual features that are independent of specific  
989 modalities like polarization or color, whereas cell types with preferential connections to either  
990 pale or yellow columns are promising candidates for the study of color processing in the insect  
991 brain. This comprehensive catalog of the neurons carrying signals from R7 and R8

992 photoreceptors deeper into the brain establishes a broad foundation for further studies into the  
993 mechanistic basis of color vision and its contributions to perception and behavior.

994

995

## 996 **Materials & Methods**

### 997 EM reconstruction

998           The “Full Adult Female Brain” (FAFB) data set is a serial section transmission electron  
999 microscopy volume of a female *Drosophila melanogaster* brain (Zheng et al. 2018). We  
1000 manually reconstructed neurons in this volume in the CATMAID environment, which includes  
1001 a browser-based annotation interface and a server hosting a copy of the data (Saalfeld et al.  
1002 2009). We also searched for neurons using two recent auto-segmentations FAFB-FFN1 (Li et  
1003 al. 2020) and FlyWire (Dorkenwald et al. 2020), importing some of the FAFB-FFN1 auto-  
1004 segmentation fragments afterwards into the CATMAID environment, a process that facilitated  
1005 the identification of a small number of neurons. We followed established guidelines for  
1006 manually tracing neuron skeletons, annotating synaptic connections, and reviewing  
1007 reconstructed cells (Schneider-Mizell et al. 2016). We completely traced the morphology of  
1008 pairs of R7 and R8 cells in 7 “seed” columns, 4 adjacent columns chosen to be near the center  
1009 of the retinal mosaic, and 3 columns in the dorsal rim area (Figure 1C). On the R7 and R8  
1010 cells, we annotated as a “pre-synapse” all the locations where there was a T-bar (Figure 1 –  
1011 figure supplement 1A). Associated with each pre-synapse we annotated a “post-synapse”  
1012 connection with every synaptic partner. These seed neurons and their pre-synapses were  
1013 completely proofread by independent team members, a process that amounted in small  
1014 (<10%) amendments to the connectivity data presented here.

1015           In total, we identified 4043 connections from the seed column R7 and R8 cells to 422  
1016 post-synaptic skeletons (the vast majority of which correspond to individual neurons), including  
1017 the 14 R7/8 cells. We reconstructed their morphology to be able to identify the cell type (e.g.  
1018 Dm8, Mi1, Tm5a) or cell class (e.g. Dm, Mi, Tm) of 299 cells, whose synapses accounted for  
1019 96.2% (3888/4043) of the total synaptic output. For all but one cell, we applied a threshold of  
1020 >2 synapses to focus our reconstructions on reliable connections – the exception was the Mt-  
1021 VPN2 cell, which had a large dendritic field and so may integrate many sparse R7 and R8  
1022 inputs (Figure 5 – figure supplement 1). There were 244 cells with >2 synapses, of which 224  
1023 were identified to cell type, 16 were identified to cell class, giving a total of 240 identified cells

1024 (224 + 16 cells), and the remaining 4 were unidentified (Tables 1 and 3). The 240 identified  
1025 cells with >2 synapses accounted for 94% (3803/4043) of the total synapses. The 16 cells  
1026 traced to cell class were sparsely connected, with 4.9 synapses per cell (mean, 79 synapses  
1027 total). The R7 and R8 cells make infrequent synaptic contacts with glia as well as neurons  
1028 (Figure 1 – figure supplement 1C), but we did not systematically trace the glia connections. In  
1029 very rare locations in the FAFB data set, our ability to completely trace processes to  
1030 completeness was precluded by aberrations in the image quality (Figure 1 – figure supplement  
1031 1D), but in most cases the identity of the post-synaptic neurons could still be established.

1032         The 244 cells with >2 synapses were the focus of our analysis, and their connections  
1033 are summarized in Tables 1 and 3; the connections of individual cells are also organized by  
1034 cell type for incoming and outgoing synapses in Supplementary File 1. In addition, the  
1035 morphologies and connections of individual cells with >1 synapses are shown in the gallery  
1036 figures (Supplementary File 2). Most neurons could be uniquely identified with incomplete  
1037 reconstructions. Nevertheless, it is useful to establish a reference morphology data and so we  
1038 completely reconstructed individual examples of specific cell types, in addition to the seed R7  
1039 and R8 cells, and in some cases multiple examples. In the central eye, there were 14  
1040 completely reconstructed neurons: Dm2, Dm8 (3 cells), Dm9, Dm11, MeTu, Mi15, ML1, ML-  
1041 VPN1, Tm5a, Tm5b, Tm5c (2 cells). In the DRA, there were 10 completely reconstructed  
1042 neurons: DmDRA1 (4 cells), DmDRA2 (3 cells), and MeTuDRA (3 cells). A number of these  
1043 cell types we reconstructed have not been previously described: aMe12, ML1, ML-VPN1, and  
1044 ML-VPN2 in the central eye; MeMeDRA, MeTuDRA, DRA-VPN and Mti-DRA in the DRA. For  
1045 one cell whose morphology was similar to the described Tm5a cell type, but whose connectivity  
1046 was markedly different from the others, we annotated this cell as Tm5a-like. Likewise, for three  
1047 cells whose morphology was similar to the described Tm5b cell type, but whose connectivity  
1048 was markedly different from that reported by (Menon et al. 2019), we annotated these cells as  
1049 Tm5b-like. There were numerous tangential cells contacted in the central eye and DRA  
1050 columns that do not match those characterized in previous anatomical studies (Fischbach and  
1051 Dittrich 1989). We have annotated these as medulla tangential intrinsic (Mti) cells when the

1052 cells have processes intrinsic to the medulla, and as medulla tangential visual projection  
1053 neurons (Mt-VPNs) when they project to neuropils outside the medulla.

1054 We additionally identified 970 incoming synapses to the seed column R7/8 cells from  
1055 56 cells, including the 14 R7/8 cells. All of the 30 cells providing >2 synapses were traced so  
1056 that we could ascribe a cell type, and these cells provided 96% (936/970) of the total incoming  
1057 synapses (Tables 2,4). In total, we identified the presynaptic cell type of 99% (963/970) of the  
1058 synapses onto the R7/8 cells (including the 1-synapse contributing cells). All but 1 of the cells  
1059 providing >2 synapses were themselves contacted by the seed column R7/8 cells, the  
1060 exception being a DRA C2 cell that provided 5 synapses (Supplementary File 1 - C2 incoming).  
1061 Including this C2 cell, there were 245 cells with >2 input or output synapses with the seed  
1062 column photoreceptors (244 + 1 cells).

1063 This report was focused on identifying the synaptic inputs and outputs of the R7 and  
1064 R8 cells of the central eye and DRA, and so the focus was not on identifying the synaptic inputs  
1065 to the cells targeted by these photoreceptors. For exceptional cell types, however, we traced  
1066 more than the cells' connections to the seed column R7 and R8 cells. 1) We traced three  
1067 aMe12 cells to near completion, to determine the columns that contained the cell type's  
1068 characteristic vertical processes that we used to determine whether a column was pale or not  
1069 (see below). 2) We traced all the photoreceptor inputs to three Dm8 cells in the central eye  
1070 seed columns (Figure 2Cii-iii). 3) For the Mt-VPN1 cell, we reconstructed the photoreceptor  
1071 inputs in 20 medulla columns to discount the possibility that this was a pale-specific neuronal  
1072 target in the central eye. 4) For three fully reconstructed DmDRA1 cells and three fully  
1073 reconstructed DmDRA2 cells we traced all their R7-DRA and R8-DRA inputs (Figure 6E,F). 5)  
1074 For one Dm9 cell innervated by R7-DRA and R8-DRA, we traced in non-DRA columns to  
1075 confirm that Dm9 cells in the DRA also receive non-DRA photoreceptor input (Figure 6Cvi).

#### 1076 Defining pale, yellow and DRA medulla columns

1077 To identify medulla columns, we used a map of Mi1 neurons. This Mi1 map, which we  
1078 have generated for a separate, ongoing study, includes nearly all Mi1 neurons in the medulla  
1079 of the right hemisphere of the FAFB volume. The Mi1 cell type is columnar, with one cell per

1080 column and unambiguous arborizations in medulla layer 1, 5, 9 and 10 (Fischbach and Dittrich  
1081 1989). We defined the location of a column in the medulla as the center-of-mass of the Mi1  
1082 dendrite in layer 5 (Figure 1C, 2A).

1083 We traced the vertical dendritic branches of all three aMe12 cells in the data set. Their  
1084 vertical branches innervate pale columns (Figure 1D), and so we labelled the columns they  
1085 occupied (by proximity to the nearest Mi1-defined column) as pale columns (Figure 1C). The  
1086 aMe12 cells have short vertical branches reaching from M6 to M3 and longer vertical branches  
1087 reaching up to M1 (Figure 1Dii, Eiii). Both the long and short vertical processes were used to  
1088 assign pale medulla columns. Nearly all the assigned pale columns were innervated by one  
1089 aMe12 cell, but three columns were innervated by two cells. Using this system, the columns  
1090 not innervated by aMe12 were yellow candidates (Figure 1C). Despite extreme care and  
1091 multiple reviews of the aMe12 neurons, errors of omission are always possible in the manual  
1092 reconstruction procedure, and so we are confident that the 'pale' identified columns are  
1093 innervated by aMe12, however, it is possible that a small number of the 'yellow' columns are  
1094 mis-classified. The aMe12 cells innervated just 1 of the 42 identified DRA columns (Figure 1C).  
1095 While the majority of medulla columns innervated by R7/8 are pale or yellow, there are a small  
1096 number of ommatidial cartridges with other identities, for example rare (~1-2 per fly) ommatidial  
1097 pairs of R7 and R8 cells expressing Rh3 and Rh6, respectively (Chou et al. 1996). The  
1098 congruence of the pale- and yellow-specificity we observed for Tm5a, aMe12 and ML-VPN1  
1099 cell types, indicated that our allocation of pale columns in the central eye seed columns was  
1100 robust, and consistent with the previous report of the yellow-specificity of Tm5a cells  
1101 (Karuppudurai et al. 2014).

1102 To identify the DRA columns, we reconstructed the R7 and R8 cells in 27 columns  
1103 along the dorsal-rim-corresponding margin of the medulla and ascertained whether the R8 cell  
1104 terminated in the same layer as the R7 cell (Figure 1E, arrow; Figure 1 – figure supplement  
1105 1A). The R8-DRA cells terminate before the R7-DRA cells in this layer, allowing the two cell  
1106 types to be distinguished. By careful visual inspection of the M6 layer of all medulla columns  
1107 located close to the dorsal edge of the medulla we identified 15 additional DRA columns

1108 resulting in a total of 42 DRA columns which is in good agreement with the previously reported  
1109 average number of 39 DRA columns (Weir et al. 2016; Figure 1C).

1110

### 1111 Analysis of synapse locations

1112 To define the medulla and lobula layers, we first used the R package “natverse” (Bates  
1113 et al. 2020) to transform pre-defined neuropil meshes (Jenett et al. 2012; Bogovic et al. 2019)  
1114 into the FAFB space. Our meshes for the medulla and lobula computed in this way defined the  
1115 top and bottom layers of these neuropils. We then interpolated the initial internal layer  
1116 boundaries using demarcations established in prior studies (Takemura et al. 2015; Wu et al.  
1117 2016). Finally, we refined the layer boundaries using the characteristic arborizations patterns  
1118 of the Mi1, C2, Tm5 and Tm20 cell types (Gao et al. 2008; Fischbach and Dittrich 1989). For  
1119 the medulla, the demarcations were: 0%, 8.2%, 26.2%, 36.1%, 45.9%, 54.1%, 62.3%, 67.2%,  
1120 76.2%, 91.0%, 100%. For the lobula the layer demarcations were: 0%, 4.2%, 11.3%, 22.4%,  
1121 37.4%, 49.4%, 64.7%, 100%. The layer designations are therefore guides to aid interpretations  
1122 and comparisons, and not measurements of the neuropils themselves.

1123 To plot the histograms of the synaptic depths in the medulla (e.g. Figure 1Eiii, we took  
1124 the projection of the synapse locations along the columnar axis, and smoothed this distribution  
1125 of synaptic depths with a zero-phase Gaussian filter with a standard deviation of 0.4  $\mu\text{m}$ . For  
1126 the histograms of distances of R7 synapses to each Dm8 cell’s home column (Figure 2Ciii),  
1127 we took the projection of the synapse locations onto the plane perpendicular to the columnar  
1128 axis, and calculated the distance in that plane to the column center. The resulting distribution  
1129 of distances was then smoothed with a zero-phase Gaussian filter with a standard deviation of  
1130 0.6  $\mu\text{m}$ .

1131 For the histograms of the distances along the DRA of photoreceptor synapses to  
1132 DmDRA1 and DmDRA2 cells (Figure 6E,F), we first fitted an ellipse to the centers of DRA  
1133 columns, using least squares regression (Figure 7 – figure supplement 2Ai). We then  
1134 calculated the location of the perpendicular projection of every synapse along the fitted ellipse



1135 (Figure 7 – figure supplement 2Aii-iv). Finally, these distances were filtered with a zero-phase  
1136 Gaussian filter with a standard deviation of 0.6  $\mu\text{m}$ .

1137

### 1138 Comparison with 7-column medulla FIB-SEM data set

1139 To compare the connectivity of R7 and R8 of our central eye reconstructions with the  
1140 connectivity identified in the medulla FIB-SEM data set (Takemura et al. 2015; Takemura et  
1141 al. 2013), we took advantage of the identification of pale and yellow columns in that data set  
1142 used by (Menon et al. 2019). They used the presence or absence of Tm5a to indicate yellow  
1143 and pale columns, respectively, and excluded columns that contained Tm5 neurons that were  
1144 ambiguous for being Tm5a or Tm5b neurons. Using this scheme, columns B, D and H are  
1145 pale, and columns A, E and F are yellow. The 7-column medulla data set is now publically  
1146 available and accessible with the release of NeuPrint (Clements et al. 2020), and we used  
1147 NeuPrint to compile the connectivity of cells with pale and yellow R7 and R8 cells from the  
1148 data set (Figure 1 suppl. 2). The unidentified cells, including cells annotated as output ('out')  
1149 and fragments of putative tangential cells ('tan') in the six pale and yellow columns are 38.1%  
1150 for R7 ( 518/1342 synapses over 6 columns) and 38.9% for R8 (726/1854 synapses over 6  
1151 columns).

1152 We also searched the FIB-SEM data set for neurons with shapes and patterns of  
1153 connectivity similar to aMe12, ML1, and MeTu neurons and identified the following putative  
1154 matches (NeuPrint medulla7column identifiers in parenthesis): aMe12 (54028), ML1(16666),  
1155 MeTu (11770; annotated as an unknown Tm; 35751 and other reconstructions annotated as  
1156 'Dm7'). The ML1 and MeTu matches are further supported by multiple inputs other than R-  
1157 cells (e.g. L3, L4 and Dm9 to ML1 and Mi15 to MeTu) that are present in both datasets. These  
1158 matches provide examples of how the combination of our complete but focused  
1159 reconstructions and the dense but strongly volume-limited FIB-SEM data can together enable  
1160 insights that go beyond each individual dataset.

1161

### 1162 Genetics and molecular biology

1163 Fly genotypes

1164 Fly genotypes are listed in the Key Resources Table (organized by Figure panel).

1165

1166 Driver lines

1167 Split-GAL4 lines were constructed and characterized as in previous work (Wu et al.  
1168 2016). Briefly, we tested candidate AD and DBD hemidriver pairs (Tirian and Dickson 2017;  
1169 Dionne et al. 2018). for expression in cell types of interest and assembled successful  
1170 combinations into stable fly strains that were then used for subsequent experiments. Split-  
1171 GAL4 lines generated in this study and images of their expression patterns will be made  
1172 available at (<https://www.janelia.org/split-GAL4>). aMe12, ML1 and ML-VPN1 were initially  
1173 identified by light microscopy, allowing us to generate split-GAL4 driver lines targeting these  
1174 previously undescribed cell types. Images of cells labeled by these driver lines were  
1175 subsequently matched to the EM reconstructions. Split-GAL4 lines labeling Dm11, Mi15, L2  
1176 and VPN-DRA were from prior work (Davis et al. 2020; Tuthill et al. 2013; Wu et al. 2016). The  
1177 candidate VPN-DRA driver (OL0007B) was originally described as a split-GAL4 driver for a  
1178 different cell type (LC12, (Wu et al. 2016)) but also labels neurons highly similar or identical to  
1179 VPN-DRA. We also used GAL4 driver lines from the Janelia and Vienna Tiles collections  
1180 (Jenett et al. 2012; Tirian and Dickson 2017).

1181 Rhodopsin-LexA reporter constructs

1182 To construct Rh3-, Rh5- and Rh6-LexA driver lines, we amplified previously  
1183 characterized promoter regions (Mollereau et al. 2000; Pichaud and Desplan 2001; Tahayato  
1184 et al. 2003; Chou et al. 1996; Papatsenko, Sheng, and Desplan 1997; Huber et al. 1997) by  
1185 PCR from genomic DNA. Primer sequences are listed in the Key Resources Table. The PCR  
1186 products were TOPO-cloned into pENTR-D-TOPO (Invitrogen) and transferred to  
1187 [pBPnlsLexA::GADflUw](#) (addgene #26232) using standard Gateway cloning. Transgenic flies  
1188 were generated by phiC31-mediated integration into the attP40 landing site (injections were  
1189 done by Genetic Services, Inc).

1190

1191 Histology

1192 To characterize the neurons labeled by split-GAL4 lines, we visualized both overall  
1193 expression patterns and individual cells. For the former, we used we pJFRC51-3XUAS-IVS-  
1194 Syt::smHA in su(Hw)attP1 and pJFRC225-5XUAS-IVS-myr::smFLAG in VK00005 (Nern et al.,  
1195 2015) or 20XUAS-CsChrimson-mVenus in attP18 (Klapoetke et al. 2017) as reporters; the  
1196 latter was achieved by stochastic labeling of individual cells with MCFO (Nern, Pfeiffer, and  
1197 Rubin 2015). Specimens were processed and imaged by the Janelia FlyLight Project team  
1198 following protocols that are available online ([https://www.janelia.org/project-](https://www.janelia.org/project-team/flylight/protocols)  
1199 [team/flylight/protocols](https://www.janelia.org/project-team/flylight/protocols) under “IHC - Anti-GFP”, “IHC - Polarity Sequential”, “IHC – MCFO and  
1200 “DPX mounting”). Additional MCFO images of cells labeled by GAL4 (instead of split-GAL4)  
1201 driver lines were generated in the same way. Images were acquired on Zeiss LSM 710 or 780  
1202 confocal microscope using 20x 0.8 NA or 63x 1.4 NA objectives.

1203 For the combined labeling of aMe12, ML-VPN1 and VPN-DRA with photoreceptor  
1204 markers, fly brains were processed using standard immunolabeling protocols as previously  
1205 described in (Davis et al. 2020). Briefly, flies were dissected in insect cell culture medium  
1206 (Schneider’s Insect Medium, Sigma Aldrich, #S0146) followed by fixation with 2% PFA (w/v;  
1207 prepared from a 20% stock solution, Electron Microscopy Sciences: 15713) in cell culture  
1208 medium for 1 h at room temperature. This fixation step and the subsequent primary and  
1209 secondary antibody incubations were each followed by several washes with PBT ( 0.5 % (v/v)  
1210 TX-100 (Sigma Aldrich: X100) in PBS ). To block nonspecific antibody binding, brains were  
1211 incubated in PBT-NGS (5% Goat Serum, ThermoFisher: 16210-064, in PBT) for at least 30  
1212 min prior to addition of primary antibodies in PBT-NGS. Primary and secondary antibody  
1213 incubations were at 4°C overnight, all other steps were at room temperature. Brains were  
1214 mounted in SlowFadeGold (ThermoFisher: S36937).

1215 Primary antibodies were anti-GFP rabbit polyclonal (ThermoFisher: A-11122,  
1216 RRID:AB\_221569; used at 1:1000 dilution), anti-GFP mouse monoclonal 3E6 (ThermoFisher:  
1217 A-11120, RRID:AB\_221568; dilution 1:100), anti-dsRed rabbit polyclonal (Clontech  
1218 Laboratories, Inc.: 632496, RRID:AB\_10013483; dilution 1:1000), anti-chaoptin mouse

1219 monoclonal 24B10 (Fujita et al., 1982; DSHB: RRID:AB\_528161, dilution 1:20) and anti-Brp  
1220 mouse monoclonal nc82 (Wagh et al., 2006; DSHB:RRID:AB\_2314866; dilution 1:30).  
1221 Secondary antibodies were from Jackson ImmunoResearch Laboratories, Inc. . Images were  
1222 acquired on a Zeiss LSM 880 or confocal microscope using a 40x 1.3 NA objective.

1223

#### 1224 Image processing

1225 Most anatomy figures show reconstructed views of cells of interest generated from  
1226 confocal stack using FluoRender (<http://www.sci.utah.edu/software/fluorender.html>). Some  
1227 images were manually edited to only show the cell relevant for the comparison to the EM  
1228 reconstructions. Some panels in Figure 4 are overlays of registered images with either the  
1229 template brain used for registration (Bogovic et al. 2019) or the pattern of a second registered  
1230 expression pattern (L2 lamina neurons terminal in Figure 4 Bvi ). Images with rhodopsin  
1231 reporter (Rh3-, Rh5 or Rh6-LexA) labeling show single sections or maximum intensity  
1232 projections through a small number of adjacent slices. For these images, other processing was  
1233 limited to adjustments of brightness and contrast across the entire field of view for each  
1234 channel.

1235 **Acknowledgements**

1236 The authors thank: Lou Scheffer, Shinya Takemura, and Kazunori Shinomiya for access to  
1237 data, advice and discussions; the FAFB tracing community for supportive and open sharing of  
1238 methods and data; Janelia Fly Core for fly care and Janelia FlyLight Project Team for help with  
1239 preparation and imaging of light microscopy samples; and the Janelia Visitor program for  
1240 facilitating early stages of this collaboration. This work was supported by the Deutsche  
1241 Forschungsgemeinschaft (DFG) through grants WE 5761/2-1 (M.F.W.) and SPP2205  
1242 (M.F.W.), AFOSR grant FA9550-19-1-7005 (M.F.W), with support from the Fachbereich  
1243 Biologie, Chemie & Pharmazie of the Freie Universität Berlin (M.F.W.) and by the Howard  
1244 Hughes Medical Institute through its support of the Janelia Research Campus (M.B.R. and  
1245 G.M.R.).

1246

1247 **Supplementary Files**

1248

1249 Supplementary File 1:

1250 Tables of all central eye R7 and R8 and DRA R7 and R8 target cells by type

1251

1252 Supplementary File 2:

1253 Gallery plots of all central eye R7 and R8 and DRA R7 and R8 target cells by type

1254

## 1255 References

- 1256 Bates AS, Manton JD, Jagannathan SR, Costa M, Schlegel P, Rohlfing T, and Jefferis GS.  
1257 2020. 'The natverse, a versatile toolbox for combining and analysing neuroanatomical  
1258 data', *Elife*, 9:e53350.
- 1259 Bell ML, Earl JB, and Britt SG. 2007. 'Two types of *Drosophila* R7 photoreceptor cells are  
1260 arranged randomly: a model for stochastic cell-fate determination', *J Comp Neurol*, 502:  
1261 75-85.
- 1262 Bogovic JA, Otsuna H, Heinrich L, Ito M, Jeter J, Meissner G, Nern A, Colonell J, Malkesman  
1263 O, Ito K., and Saalfeld S. 2019. 'An unbiased template of the *Drosophila* brain and  
1264 ventral nerve cord': *PLoS One* 15: e0236495.
- 1265 Busch S, Selcho M, Ito K, and Tanimoto H.. 2009. 'A map of octopaminergic neurons in the  
1266 *Drosophila* brain', *J Comp Neurol*, 513: 643-67.
- 1267 Chin AL, Lin CY, Fu TF, Dickson BJ, and Chiang AS. 2014. 'Diversity and wiring variability of  
1268 visual local neurons in the *Drosophila* medulla M6 stratum', *J Comp Neurol*, 522: 3795-  
1269 816.
- 1270 Chou WH, Hall KJ, Wilson DB, Wideman CL, Townson SM, Chadwell LV, and Britt SG. 1996.  
1271 'Identification of a novel *Drosophila* opsin reveals specific patterning of the R7 and R8  
1272 photoreceptor cells', *Neuron*, 17: 1101-15.
- 1273 Clements J, Dolafi T, Umayam L, Neubarth NL, Berg S, Scheffer LK, and Plaza SM. 2020.  
1274 'neuPrint: Analysis Tools for EM Connectomics': *bioRxiv* 2020.01.16.909465.
- 1275 Courgeon M, and Desplan C. 2019. 'Coordination between stochastic and deterministic  
1276 specification in the *Drosophila* visual system', *Science*, 366: eaay6727.
- 1277 Dacke M, and El Jundi B. 2018. 'The Dung Beetle Compass', *Curr Biol*, 28: R993-R97.
- 1278 Davis FP, Nern A, Picard S, Reiser MB, Rubin GM, Eddy SR, and Henry GL. 2020. 'A genetic,  
1279 genomic, and computational resource for exploring neural circuit function', *Elife*, 9:  
1280 e50901.
- 1281 Dionne H, Hibbard KL, Cavallaro A, Kao JC, and Rubin GM. 2018. 'Genetic Reagents for  
1282 Making Split-GAL4 Lines in *Drosophila* ', *Genetics*, 209: 31-35.
- 1283 Dorkenwald S, McKellar C, Macrina T, Kemnitz N, Lee K, Lu R, Wu J, Popovych S, Mitchell E,  
1284 Nehoran B, Jia Z, Bae JA, Mu S, Ih D, Castro M, Ogedengbe O, Halageri A, Ashwood  
1285 Z, Zung J, Brittain D, Collman F, Schneider-Mizell C, Jordan C, Silversmith W, Baker  
1286 C, Deutsch D, Encarnacion-Rivera L, Kumar S, Burke A, Gager J, Hebditch J, Koolman  
1287 S, Moore M, Morejohn S, Silverman B, Willie K, Willie R, Yu S-C, Murthy M, and Seung  
1288 HS. 2020. 'FlyWire: Online community for whole-brain connectomics': *bioRxiv*  
1289 2020.08.30.274225.
- 1290 el Jundi B, Pfeiffer K, and Homberg U. 2011. 'A distinct layer of the medulla integrates sky  
1291 compass signals in the brain of an insect', *PLoS One*, 6: e27855.
- 1292 Feiler R, Bjornson R, Kirschfeld K, Mismar D, Rubin GM, Smith DP, Socolich M, and Zuker  
1293 CS. 1992. 'Ectopic expression of ultraviolet-rhodopsins in the blue photoreceptor cells  
1294 of *Drosophila*: visual physiology and photochemistry of transgenic animals', *J Neurosci*,  
1295 12: 3862-8.
- 1296 Fischbach KF, and Dittrich APM. 1989. 'The Optic Lobe of *Drosophila melanogaster* .1. A  
1297 Golgi Analysis of Wild-Type Structure', *Cell Tissue Res*, 258: 441-75.
- 1298 Fischbach KF, and Lyly-Hunerberg I. 1983. 'Genetic dissection of the anterior optic tract of  
1299 *Drosophila melanogaster*', *Cell Tissue Res*, 231: 551-63.

- 1300 Fortini ME, and Rubin GM. 1990. 'Analysis of Cis-Acting Requirements of the Rh3 and Rh4  
1301 Genes Reveals a Bipartite Organization to Rhodopsin Promoters in *Drosophila*  
1302 *melanogaster*', *Gene Dev*, 4: 444-63.
- 1303 ———. 1991. 'The Optic Lobe Projection Pattern of Polarization-Sensitive Photoreceptor Cells  
1304 in *Drosophila melanogaster*', *Cell Tissue Res*, 265: 185-91.
- 1305 Gao S, Takemura SY, Ting CY, Huang S, Lu Z, Luan H, Rister J, Thum AS, Yang M, Hong  
1306 ST, Wang JW, Odenwald WF, White BH, Meinertzhagen IA, and Lee CH. 2008. 'The  
1307 neural substrate of spectral preference in *Drosophila*', *Neuron*, 60: 328-42.
- 1308 Gkaniats E, Risse B, Mangan M, and Webb B. 2019. 'From skylight input to behavioural output:  
1309 A computational model of the insect polarised light compass', *PLoS Comput Biol*, 15:  
1310 e1007123.
- 1311 Hardcastle BJ, Omoto JJ, Kandimalla P, Nguyen BM, Keles MF, Boyd NK, Hartenstein V, and  
1312 Frye MA. 2021. 'A visual pathway for skylight polarization processing in *Drosophila*',  
1313 *Elife*, 10: e63225
- 1314 Heath SL, Christenson MP, Oriol E, Saavedra-Weisenhaus M, Kohn JR, and Behnia R. 2020.  
1315 'Circuit mechanisms underlying chromatic encoding in *Drosophila* photoreceptors'. *Curr*  
1316 *Biol*. 30(2):264-275.e8.
- 1317 Heinze S. 2017. 'Unraveling the neural basis of insect navigation', *Curr Opin Insect Sci*, 24:  
1318 58-67.
- 1319 Heisenberg M, and Buchner E. 1977. 'The role of retinula cell types in visual behavior of  
1320 *Drosophila melanogaster*', *J Comp Physiol*, 117: 127-62.
- 1321 Hempel de Ibarra N, Vorobyev NM, and Menzel R. 2014. 'Mechanisms, functions and ecology  
1322 of colour vision in the honeybee', *J Comp Physiol A*, 200: 411-33.
- 1323 Hilbrant M, Almudi I, Leite DJ, Kuncheria L, Posnien N, Nunes MD, and McGregor AP. 2014.  
1324 'Sexual dimorphism and natural variation within and among species in the *Drosophila*  
1325 retinal mosaic', *BMC Evol Biol*, 14: 240.
- 1326 Homberg, U. 2015. 'Sky Compass Orientation in Desert Locusts-Evidence from Field and  
1327 Laboratory Studies', *Front Behav Neurosci*, 9: 346.
- 1328 Huber A, Schulz S, Bentrop J, Groell C, Wolfrum U, and Paulsen R. 1997. 'Molecular cloning  
1329 of *Drosophila* Rh6 rhodopsin: the visual pigment of a subset of R8 photoreceptor cells',  
1330 *FEBS Lett*, 406: 6-10.
- 1331 Hulse BK, Haberkern H, Franconville R, Turner-Evans DB, Takemura S, Wolff T, Noorman M,  
1332 Dreher M, Dan C, Parekh R, Hermundstad AN, Rubin GM, and Jayaraman V. 2020. 'A  
1333 connectome of the *Drosophila* central complex reveals network motifs suitable for  
1334 flexible navigation and context-dependent action selection': *bioRxiv*  
1335 2020.12.08.413955.
- 1336 Jagadish S, Barnea G, Clandinin TR, and Axel R. 2014. 'Identifying functional connections of  
1337 the inner photoreceptors in *Drosophila* using Tango-Trace', *Neuron*, 83: 630-44.
- 1338 Jenett A, Rubin GM, Ngo TT, Shepherd D, Murphy C, Dionne H, Pfeiffer BD, Cavallaro A, Hall  
1339 D, Jeter J, Iyer N, Fetter D, Hausenfluck JH, Peng H, Trautman ET, Svirskaas RR, Myers  
1340 EW, Iwinski ZR, Aso Y, DePasquale GM, Enos A, Hulamm P, Lam SC, Li HH, Lavery  
1341 TR, Long F, Qu L, Murphy SD, Rokicki K, Safford T, Shaw K, Simpson JH, Sowell A,  
1342 Tae S, Yu Y, and Zugates CT. 2012. 'A GAL4-driver line resource for *Drosophila*  
1343 neurobiology', *Cell Rep*, 2: 991-1001.
- 1344 Karuppudurai T, Lin TY, Ting CY, Pursley R, Melnattur KV, Diao F, White BH, Macpherson LJ,  
1345 Gallio M, Pohida T, and Lee CH. 2014. 'A hard-wired glutamatergic circuit pools and  
1346 relays UV signals to mediate spectral preference in *Drosophila*', *Neuron*, 81: 603-15.



- 1347 Kind E, Belušič G, and Wernet MF. 2020. 'Retinal Mosaics Across Fly Species: Variations on  
1348 a Theme.' in, *Reference Module in Neuroscience and Biobehavioral Psychology*  
1349 (Elsevier).
- 1350 Klapoetke NC, Murata Y, Kim SS, Pulver SR, Birdsey-Benson A, Cho YK, Morimoto TK,  
1351 Chuong AS, Carpenter EJ, Tian Z, Wang J, Xie Y, Yan Z, Zhang Y, Chow BY, Curek  
1352 B, Melkonian M, Jayaraman V, Constantine-Paton M, Wong GK-S, and Boyden ES.  
1353 2014. 'Independent Optical Excitement of Distinct Neural Populations', *Nat Methods*,  
1354 11: 338-346.
- 1355 Konstantinides N, Kapuralin K, Fadil C, Barboza L, Satija R, and Desplan C. 2018. 'Phenotypic  
1356 Convergence: Distinct Transcription Factors Regulate Common Terminal Features',  
1357 *Cell*, 174: 622-35 e13.
- 1358 Kurmangaliyev YZ, Yoo J, Valdes-Aleman J, Sanfilippo P, and Zipursky SL. 2020.  
1359 'Transcriptional Programs of Circuit Assembly in the *Drosophila* Visual System',  
1360 *Neuron*, 108: 1045-57 e6.
- 1361 Kvon EZ, Kazmar T, Stampfel G, Yanez-Cuna JO, Pagani M, Schernhuber K, Dickson BJ, and  
1362 Stark A. 2014. 'Genome-scale functional characterization of *Drosophila* developmental  
1363 enhancers in vivo', *Nature*, 512: 91-5.
- 1364 Labhart T. 1988. 'Polarization-Opponent Interneurons in the Insect Visual-System', *Nature*,  
1365 331: 435-37.
- 1366 Li F, Lindsey JW, Marin EC, Otto N, Dreher M, Dempsey G, Stark I, Bates AS, Pleijzier MW,  
1367 Schlegel P, Nern A, Takemura SY, Eckstein N, Yang T, Francis A, Braun A, Parekh R,  
1368 Costa M, Scheffer LK, Aso Y, Jefferis GS, Abbott LF, Litwin-Kumar A, Waddell S, and  
1369 Rubin GM. 2020. 'The connectome of the adult *Drosophila* mushroom body provides  
1370 insights into function', *Elife*, 9: e62576.
- 1371 Lin TY, Luo J, Shinomiya K, Ting CY, Lu Z, Meinertzhagen IA, and Lee CH. 2016. 'Mapping  
1372 chromatic pathways in the *Drosophila* visual system', *J Comp Neurol*, 524: 213-27.
- 1373 Luo J, Ting CY, Li Y, McQueen P, Lin TY, Hsu CP, and Lee CH. 2020. 'Antagonistic regulation  
1374 by insulin-like peptide and activin ensures the elaboration of appropriate dendritic field  
1375 sizes of amacrine neurons', *Elife*, 9: e50568.
- 1376 Mathejczyk TF, and Wernet MF. 2019. 'Heading choices of flying *Drosophila* under changing  
1377 angles of polarized light', *Sci Rep*, 9: 16773.
- 1378 ———. 2020. 'Modular assays for the quantitative study of visually guided navigation in both  
1379 flying and walking flies', *J Neurosci Methods*, 340: 108747.
- 1380 Mauss AS, Vlasits A, Borst A, and Feller M. 2017. 'Visual Circuits for Direction Selectivity',  
1381 *Annu Rev Neurosci*, 40: 211-30.
- 1382 Mazzoni EO, Celik A, Wernet MF, Vasiliauskas D, Johnston RJ, Cook TA, Pichaud F, and  
1383 Desplan C. 2008. 'Iroquois complex genes induce co-expression of rhodopsins in  
1384 *Drosophila*', *PLoS Biol*, 6: e97.
- 1385 Meinertzhagen IA, and O'Neil SD. 1991. 'Synaptic organization of columnar elements in the  
1386 lamina of the wild type in *Drosophila melanogaster*', *J Comp Neurol*, 305: 232-63.
- 1387 Meinertzhagen IA, Takemura SY, Lu Z, Huang S, Gao S, Ting CY, and Lee CH. 2009. 'From  
1388 form to function: the ways to know a neuron', *J Neurogenet*, 23: 68-77.
- 1389 Meissner GW, Nern A, Singer RH, Wong AM, Malkesman O, and Long X. 2019. 'Mapping  
1390 Neurotransmitter Identity in the Whole-Mount *Drosophila* Brain Using Multiplex High-  
1391 Throughput Fluorescence in Situ Hybridization', *Genetics*, 211: 473-82.

- 1392 Melnattur KV, Pursley R, Lin TY, Ting CY, Smith PD, Pohida T, and Lee CH. 2014. 'Multiple  
1393 redundant medulla projection neurons mediate color vision in *Drosophila*', *J*  
1394 *Neurogenet*, 28: 374-88.
- 1395 Menon KP, Kulkarni V, Takemura SY, Anaya M, and Zinn K. 2019. 'Interactions between Dpr11  
1396 and DIP-gamma control selection of amacrine neurons in *Drosophila* color vision  
1397 circuits', *Elife*, 8: e48935.
- 1398 Mollereau B, Wernet MF, Beaufils P, Killian D, Pichaud F, Kuhnlein R, and Desplan C. 2000.  
1399 'A green fluorescent protein enhancer trap screen in *Drosophila* photoreceptor cells',  
1400 *Mech Dev*, 93: 151-60.
- 1401 Morante J, and Desplan C. 2008. 'The color-vision circuit in the medulla of *Drosophila* ', *Curr*  
1402 *Biol*, 18: 553-65.
- 1403 Mota T, Gronenberg W, Giurfa M, and Sandoz JC. 2013. 'Chromatic processing in the anterior  
1404 optic tubercle of the honey bee brain', *J Neurosci*, 33: 4-16.
- 1405 Nern A, Pfeiffer DB, and Rubin GM. 2015. 'Optimized tools for multicolor stochastic labeling  
1406 reveal diverse stereotyped cell arrangements in the fly visual system', *Proc Natl Acad*  
1407 *Sci USA*, 112: E2967-76.
- 1408 Nilsson DE., and Warrant EJ. 1999. 'Visual discrimination: Seeing the third quality of light', *Curr*  
1409 *Biol*, 9: R535-7.
- 1410 Omoto JJ, Keles MF, Nguyen BM, Bolanos C, Lovick JK, Frye MA, and Hartenstein V. 2017.  
1411 'Visual Input to the *Drosophila* Central Complex by Developmentally and Functionally  
1412 Distinct Neuronal Populations', *Curr Biol*, 27: 1098-110.
- 1413 Otsuna H, and Ito K. 2006. 'Systematic analysis of the visual projection neurons of *Drosophila*  
1414 *melanogaster*. I. Lobula-specific pathways', *J Comp Neurol*, 497: 928-58.
- 1415 Otsuna H, Shinomiya K, and Ito K. 2014. 'Parallel neural pathways in higher visual centers of  
1416 the *Drosophila* brain that mediate wavelength-specific behavior', *Front Neural Circuits*,  
1417 8: 8.
- 1418 Ozel MN, Simon F, Jafari S, Holguera I, Chen YC, Benhra N, El-Danaf RN, Kapuralin K, Malin  
1419 JA, Konstantinides N, and Desplan C. 2021. 'Neuronal diversity and convergence in a  
1420 visual system developmental atlas', *Nature*, 589: 88-95.
- 1421 Pagni M, Haikala V, Oberhauser V, Meyer PB, Reiff DF, and Schnaitmann C. 2021. 'Interaction  
1422 of "chromatic" and "achromatic" circuits in *Drosophila* color opponent processing', *Curr*  
1423 *Biol*, 31, 1687-1698.
- 1424 Pantazis A, Segaran A, Liu CH, Nikolaev A, Rister J, Thum AS, Roeder T, Semenov E, Juusola  
1425 M, and Hardie RC. 2008. 'Distinct roles for two histamine receptors (hclA and hclB) at  
1426 the *Drosophila* photoreceptor synapse', *J Neurosci*, 28: 7250-9.
- 1427 Papatsenko D, Sheng G, and Desplan C. 1997. 'A new rhodopsin in R8 photoreceptors of  
1428 *Drosophila*: evidence for coordinate expression with Rh3 in R7 cells', *Development*,  
1429 124: 1665-73.
- 1430 Pfeiffer BD, Jenett A, Hammonds AS, Ngo TT, Misra S, Murphy C, Scully A, Carlson JW, Wan  
1431 KH, Lavery TR, Mungall C, Svirskas R, Kadonaga JT, Doe CQ, Eisen MB, Celniker  
1432 SE, and Rubin GM. 2008. 'Tools for neuroanatomy and neurogenetics in *Drosophila*',  
1433 *Proc Natl Acad Sci USA*, 105: 9715-20.
- 1434 Pfeiffer K, and Kinoshita M. 2012. 'Segregation of visual inputs from different regions of the  
1435 compound eye in two parallel pathways through the anterior optic tubercle of the  
1436 bumblebee (*Bombus ignitus*)', *J Comp Neurol*, 520: 212-29.

- 1437 Pichaud F, and Desplan C. 2001. 'A new visualization approach for identifying mutations that  
1438 affect differentiation and organization of the *Drosophila* ommatidia', *Development*, 128:  
1439 815-26.
- 1440 Pollack I, and Hofbauer A. 1991. 'Histamine-like immunoreactivity in the visual system and  
1441 brain of *Drosophila melanogaster*', *Cell Tissue Res*, 266: 391-8.
- 1442 Rister J, and Desplan C. 2011. 'The retinal mosaics of opsin expression in invertebrates and  
1443 vertebrates', *Dev Neurobiol*, 71: 1212-26.
- 1444 Rivera-Alba M, Vitaladevuni SN, Mishchenko Y, Lu Z, Takemura SY, Scheffer L,  
1445 Meinertzhagen IA, Chklovskii DB, and de Polavieja GC. 2011. 'Wiring economy and  
1446 volume exclusion determine neuronal placement in the *Drosophila* brain', *Curr Biol*, 21:  
1447 2000-5.
- 1448 Saalfeld S, Cardona A, Hartenstein V, and Tomancak P. 2009. 'CATMAID: collaborative  
1449 annotation toolkit for massive amounts of image data', *Bioinformatics*, 25: 1984-6.
- 1450 Salcedo E, Huber A, Henrich S, Chadwell LV, Chou WH, Paulsen R, and Britt SG. 1999. 'Blue-  
1451 and green-absorbing visual pigments of *Drosophila*: ectopic expression and  
1452 physiological characterization of the R8 photoreceptor cell-specific Rh5 and Rh6  
1453 rhodopsins', *J Neurosci*, 19: 10716-26.
- 1454 Sancer G, Kind E, Plazaola-Sasieta H, Balke J, Pham T, Hasan A, Munch LO, Courgeon M,  
1455 Mathejczyk TF, and Wernet MF. 2019. 'Modality-Specific Circuits for Skylight  
1456 Orientation in the Fly Visual System', *Curr Biol* 29: 2812-2825.e4.
- 1457 Sancer G, Kind E, Uhlhorn J, Volkmann J, Hammacher J, Pham T, Plazaola-Sasieta H, and  
1458 Wernet MF. 2020. 'Cellular and synaptic adaptations of neural circuits processing  
1459 skylight polarization in the fly', *J Comp Physiol A*, 206: 233-46.
- 1460 Scheffer LK, C. Xu CS, Januszewski M, Lu Z, Takemura SY, Hayworth KJ, Huang GB,  
1461 Shinomiya K, Maitin-Shepard J, Berg S, Clements J, Hubbard P, Katz W, Umayam L,  
1462 Zhao T, Ackerman D, Blakely T, Bogovic J, Dolafi T, Kainmueller D, Kawase T, Khairy  
1463 KA, Leavitt L, Li PH, Lindsey L, Neubarth N, Olbris DJ, Otsuna H, Trautman ET, Ito M,  
1464 Goldammer J, Wolff T, Svirskas R, Schlegel P, Neace ER, Knecht CJ, Alvarado CX,  
1465 Bailey DA, Ballinger S, Borycz JA, Canino BS, Cheatham N, Cook M, Dreher M, Duclos  
1466 O, Eubanks B, Fairbanks K, Finley S, Forknall N, Francis A, Hopkins GP, Joyce EM,  
1467 Kim SJ, Kirk NA, Kovalyak J, Lauchie SA, Lohff A, Maldonado C, Manley EA, McLin S,  
1468 Mooney C, Ndama M, Ogundeyi O, Okeoma N, Ordish C, Padilla N, Patrick C, Paterson  
1469 T, Phillips EE, Phillips EM, Rampally N, Ribeiro C, Robertson MK, Rymer JT, Ryan SM,  
1470 Sammons M, Scott AK, Scott AL, Shinomiya A, Smith C, Smith K, Smith NL, Sobeski  
1471 MA, Suleiman A, Swift J, Takemura S, Talebi I, Tarnogorska D, Tenshaw E, Tokhi T,  
1472 Walsh JJ, Yang T, Horne JA, Li F, Parekh R, Rivlin PK, Jayaraman V, Ito K, Saalfeld  
1473 S, George R, Meinertzhagen IA, Rubin GM, Hess HF, Jain V, and Plaza SM. 2020. 'A  
1474 Connectome and Analysis of the Adult *Drosophila* Central Brain', *eLife* 9: e57443.
- 1475 Schnaitmann C, Garbers C, Wachtler T, and Tanimoto H. 2013. 'Color discrimination with  
1476 broadband photoreceptors', *Curr Biol*, 23: 2375-82.
- 1477 Schnaitmann C, Haikala V, Abraham E, Oberhauser V, Thestrup T, Griesbeck O, and Reiff  
1478 DF. 2018. 'Color Processing in the Early Visual System of *Drosophila*', *Cell*, 172: 318-  
1479 30 e18.
- 1480 Schneider-Mizell CM, Gerhard S, Longair M, Kazimiers T, Li F, Zwart MF, Champion A,  
1481 Midgley FM, Fetter RD, Saalfeld S, and Cardona A. 2016. 'Quantitative neuroanatomy  
1482 for connectomics in *Drosophila*', *Elife*, 5: e12059.
- 1483 Sharkey CR, Blanco J, Leibowitz MM, Pinto-Benito D, and Wardill TJ. 2020. 'The spectral  
1484 sensitivity of *Drosophila* photoreceptors', *Sci Rep*, 10: 18242.

- 1485 Shinomiya K, Karuppudurai T, Lin TY, Lu Z, Lee CH, and Meinertzhagen IA. 2014. 'Candidate  
1486 neural substrates for off-edge motion detection in *Drosophila*', *Curr Biol*, 24: 1062-70.
- 1487 Silies MD, Gohl M, Fisher YE, Freifeld L, Clark DA, and Clandinin TR. 2013. 'Modular use of  
1488 peripheral input channels tunes motion-detecting circuitry', *Neuron*, 79: 111-27.
- 1489 Strother JA, Wu ST, Wong AM, Nern A, Rogers EM, Le JQ, Rubin GM, and Reiser MB. 2017.  
1490 'The Emergence of Directional Selectivity in the Visual Motion Pathway of *Drosophila*',  
1491 *Neuron*, 94: 168-82 e10.
- 1492 Tahayato A, Sonnevile R, Pichaud F, Wernet MF, Papatsenko D, Beaufils P, Cook T, and  
1493 Desplan C. 2003. 'Otd/Crx, a dual regulator for the specification of ommatidia subtypes  
1494 in the *Drosophila* retina', *Dev Cell*, 5: 391-402.
- 1495 Tai CY, Chin AL, and Chiang AS. 2021. 'Comprehensive map of visual projection neurons for  
1496 processing ultraviolet information in the *Drosophila* brain', *J Comp Neurol*, 529: 1988-  
1497 2013.
- 1498 Takemura S, Bharioke A, Lu ZY, Nern A, Vitaladevuni S, Rivlin PK, Katz WT, Olbris DJ, Plaza  
1499 SM, Winston P, Zhao T, Horne JA, Fetter RD, Takemura S, Blazek K, Chang LA,  
1500 Ogundeyi O, Saunders MA, Shapiro V, Sigmund C, Rubin GM, Scheffer LK,  
1501 Meinertzhagen IA, and Chklovskii DB. 2013. 'A visual motion detection circuit  
1502 suggested by *Drosophila* connectomics', *Nature*, 500: 175-181.
- 1503 Takemura, S. Y., Z. Y. Lu, and Meinertzhagen IA. 2008. 'Synaptic circuits of the *Drosophila*  
1504 optic lobe: The input terminals to the medulla', *J Comp Neurol*, 509: 493-513.
- 1505 Takemura, S. Y., Nern A, Chklovskii DB, Scheffer LK, Rubin GM, and Meinertzhagen IA. 2017.  
1506 'The comprehensive connectome of a neural substrate for 'ON' motion detection in  
1507 *Drosophila*', *Elife*, 6: e24394.
- 1508 Takemura SY, C. S. Xu, Z. Lu, P. K. Rivlin, T. Parag, D. J. Olbris, S. Plaza, T. Zhao, W. T.  
1509 Katz, L. Umayam, C. Weaver, H. F. Hess, J. A. Horne, J. Nunez-Iglesias, R. Aniceto,  
1510 L. A. Chang, S. Lauchie, A. Nasca, O. Ogundeyi, C. Sigmund, Takemura S, Tran J,  
1511 Langille C, Le Lacheur K, McLin S, Shinomiya A, Chklovskii DB, Meinertzhagen IA, and  
1512 Scheffer LK. 2015. 'Synaptic circuits and their variations within different columns in the  
1513 visual system of *Drosophila*', *Proc Natl Acad Sci USA*, 112: 13711-6.
- 1514 Timaeus L, Geid L, Sancer G, Wernet MF, and Hummel T. 2020. 'Parallel visual pathways with  
1515 topographic versus non-topographic organization connect the *Drosophila* eyes to the  
1516 central brain', *bioRxiv*: 2020.04.11.037333.
- 1517 Tirian L, and Dickson BJ. 2017. 'The VT GAL4, LexA, and split-GAL4 driver line collections for  
1518 targeted expression in the *Drosophila* nervous system': *bioRxiv* 198648.
- 1519 Tuthill JC, Nern A, Holtz SL, Rubin GM, and Reiser MB. 2013. 'Contributions of the 12 neuron  
1520 classes in the fly lamina to motion vision', *Neuron*, 79: 128-40.
- 1521 Uhlhorn J, and Wernet MF. 2020. 'Colour Vision: Self-Centered Fly Photoreceptors  
1522 Communicate over Distances', *Curr Biol*, 30: R78-R81.
- 1523 Wada S. 1974a. 'Special Marginal Ommatidia of Flies (Diptera-Brachycera) - Architecture and  
1524 Distribution in Compound Eyes', *Z Morphol Tiere*, 77: 87-125.
- 1525 ———. 1974b. 'Spezielle randzonale ommatidien von *Calliphora Erythrocephala* meig.  
1526 (diptera calliphoridae): Architektur der zentralen rhabdomeren-kolumne und  
1527 topographie im komplexauge', *Int J Insect Morphol*, 3: 397-424.
- 1528 Wardill TJ, List O, Li X, Dongre S, McCulloch M, Ting CY, O'Kane CJ, Tang S, Lee CH, Hardie  
1529 RC, and Juusola M. 2012. 'Multiple spectral inputs improve motion discrimination in the  
1530 *Drosophila* visual system', *Science*, 336: 925-31.



- 1531 Warren TL., Weir PT, and Dickinson MH. 2018. 'Flying *Drosophila melanogaster* maintain  
1532 arbitrary but stable headings relative to the angle of polarized light', *J Exp Biol*, 221.
- 1533 Wehner R, and Muller M. 1985. 'Does Interocular Transfer Occur in Visual Navigation by Ants',  
1534 *Nature*, 315: 228-29.
- 1535 Weir PT, and Dickinson MH. 2012. 'Flying *Drosophila* Orient to Sky Polarization', *Current*  
1536 *Biology*, 22: 21-27.
- 1537 Weir PT, Henze MJ, Bleul C, Baumann-Klausener F, Labhart T, and Dickinson MH. 2016.  
1538 'Anatomical Reconstruction and Functional Imaging Reveal an Ordered Array of  
1539 Skylight Polarization Detectors in *Drosophila* ', *J Neurosci*, 36: 5397-404.
- 1540 Wernet MF, Huberman AD, and Desplan C. 2014. 'So many pieces, one puzzle: cell type  
1541 specification and visual circuitry in flies and mice', *Genes Dev*, 28: 2565-84.
- 1542 Wernet MF, Labhart T, Baumann F, Mazzoni EO, Pichaud F, and Desplan C. 2003.  
1543 'Homothorax switches function of *Drosophila* photoreceptors from color to polarized  
1544 light sensors', *Cell*, 115: 267-79.
- 1545 Wernet MF, Perry MW, and Desplan C. 2015. 'The evolutionary diversity of insect retinal  
1546 mosaics: common design principles and emerging molecular logic', *Trends Genet*, 31:  
1547 316-28.
- 1548 Wernet MF, Velez MM, Clark DA, Baumann-Klausener F, Brown JR, Klovstad M, Labhart T,  
1549 and Clandinin TR. 2012. 'Genetic dissection reveals two separate retinal substrates for  
1550 polarization vision in *Drosophila* ', *Curr Biol*, 22: 12-20.
- 1551 Wu M, Nern A, Williamson WR, Morimoto MM, Reiser MB, Card GM, and Rubin GM. 2016.  
1552 'Visual projection neurons in the *Drosophila* lobula link feature detection to distinct  
1553 behavioral programs', *Elife*, 5: e21022.
- 1554 Yamaguchi S, Wolf R, Desplan C, and Heisenberg M. 2008. 'Motion vision is independent of  
1555 color in *Drosophila*', *Proc Natl Acad Sci USA*, 105: 4910-5.
- 1556 Zheng Z, Lauritzen JS, Perlman E, Robinson CG, Nichols M, Milkie D, Torrens O, Price J,  
1557 Fisher CB, Sharifi N, Calle-Schuler SA, Kmecova L, Ali IJ, Karsh B, Trautman ET,  
1558 Bogovic JA, Hanslovsky P, Jefferis GSXE, Kazhdan M, Khairy K, Saalfeld S, Fetter  
1559 RD, and Bock. 2018 DD. 'A Complete Electron Microscopy Volume of the Brain of  
1560 Adult *Drosophila melanogaster*', *Cell*, 174: 730-43 e22.
- 1561
- 1562

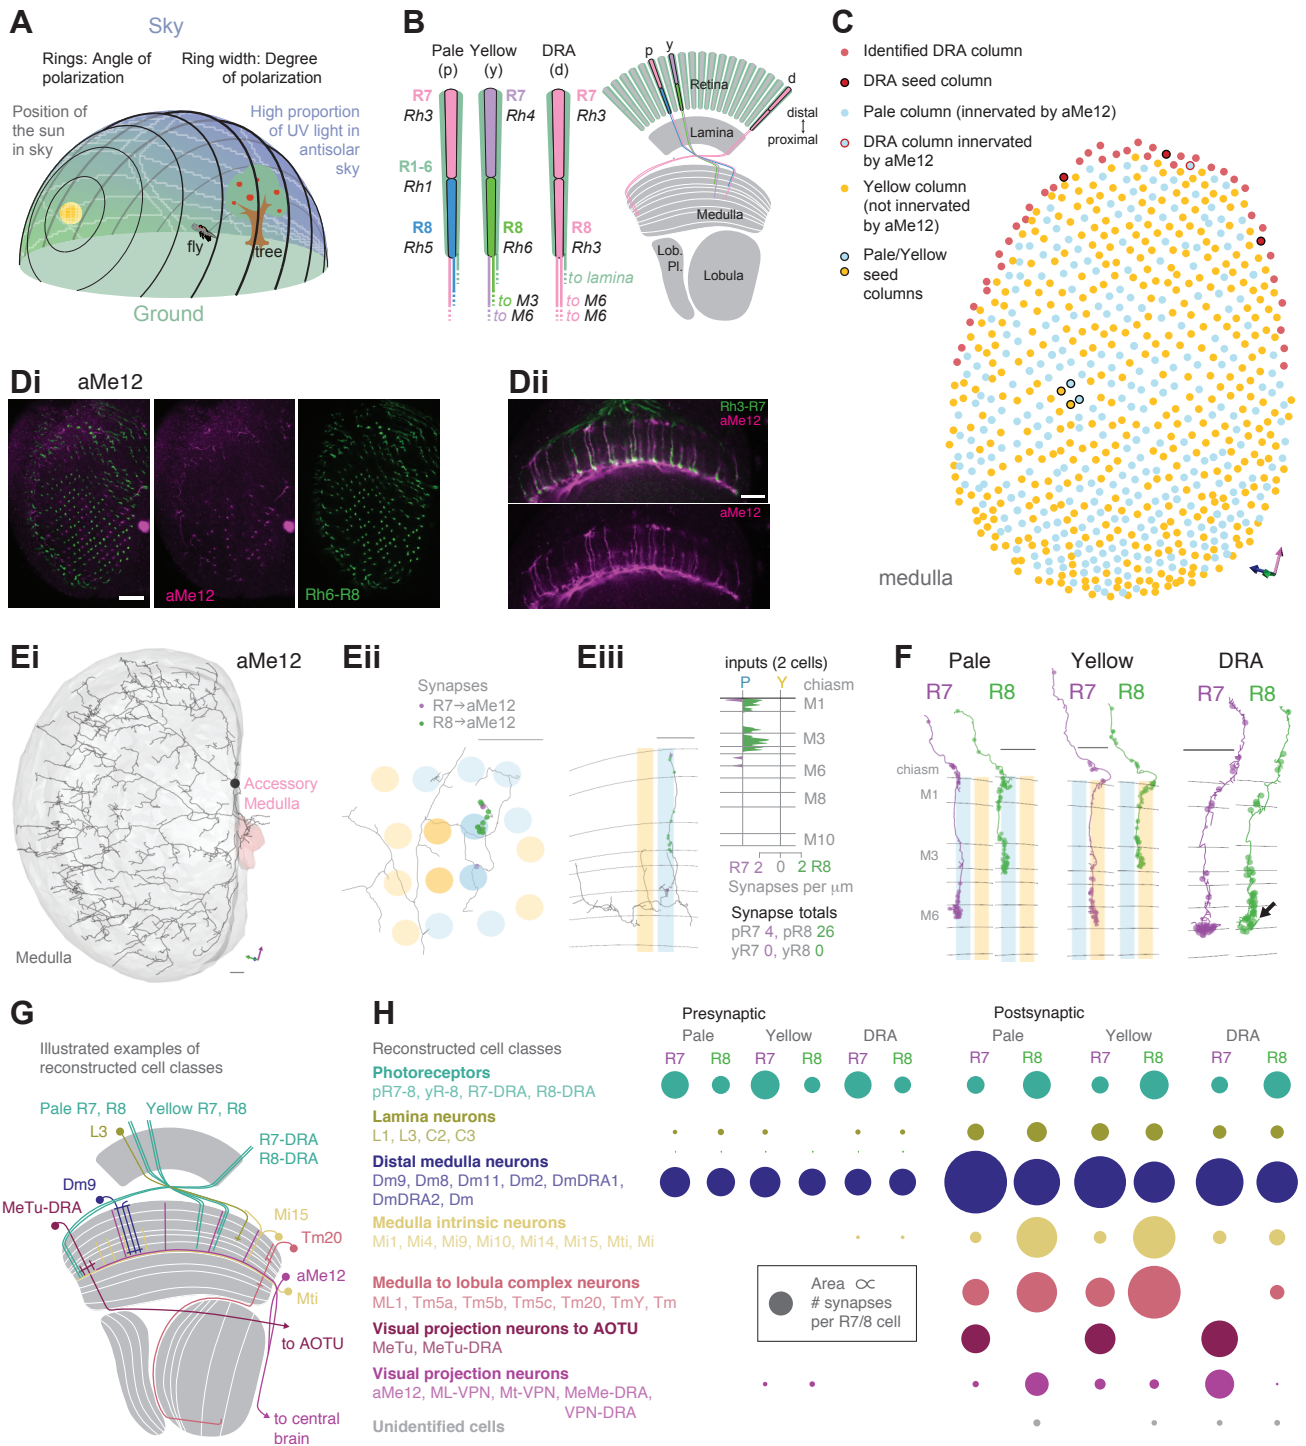

Figure 1

1563 Figure 1: Systematic reconstruction of synaptic targets of functionally specialized inner  
1564 photoreceptor cells R7 and R8

1565 **A.** Simplified schematic summarizing some of the most salient visual stimuli of a fly (center):  
1566 celestial cues (sun), color gradients (distribution of green versus UV wavelengths) and skylight  
1567 polarization (as defined by degree of polarization and angle of polarization) can be used for  
1568 navigation, as well as more or less colorful landmarks (tree). **B.** Schematic representation of  
1569 the fly visual system. Left: In the retina, inner photoreceptor R7 (distal) and R8 (proximal)  
1570 rhodopsin expression differs across three functionally specialized subtypes pale (p), yellow (y),  
1571 and DRA (d). Rh3 and Rh4 opsins are both UV-sensitive, whereas Rh5 and Rh6 are more  
1572 sensitive to blue and green wavelengths, respectively. Only in the DRA, both R7 and R8 axons  
1573 terminate in the same layer of the medulla neuropil (M6), which is the target layer of R7 cells  
1574 outside the DRA, and non-DRA R8 cells terminate in layer M3. Right: Overview of the main  
1575 four optic lobe neuropils. Out of these, only lamina and medulla receive direct photoreceptor  
1576 input. **C.** Distribution of medulla columns downstream of either p (light blue), y (yellow), and  
1577 DRA (red) photoreceptors reconstructed from the FAFB dataset. Pale columns were identified  
1578 via presence of aMe12 long vertical projections (see below). Seven seed columns used for  
1579 systematic reconstruction are highlighted with black circles. **D.** Double labeling of aMe12  
1580 vertical processes (purple) and yellow R8 cells. Left (Di): Confocal section showing the array  
1581 of medulla columns with labeling of aMe12 neurons (purple) and yellow R8 axons (green).  
1582 Note that the two patterns appear near-mutually exclusive. Right (Dii): Side view of aMe12  
1583 vertical projections and pale R7 axons (green). Di-ii Scale bars: 20  $\mu\text{m}$ . **E.** Left (Ei): Skeleton  
1584 of the optic lobe part of a fully reconstructed aMe12 neuron (gray), with processes leaving the  
1585 medulla through the accessory medulla (pink). Eii: Across the four central seed columns  
1586 (darker shading), synaptic input from R7 (purple dots) and R8 photoreceptors (green dots) to  
1587 aMe12 is specific to pale columns. Eiii, Left: Sideview depicting the distribution of R7 and R8  
1588 inputs into aMe12 across medulla layers (color code of pale and yellow columns as before).  
1589 Right: Same distribution plotted as synapses/ $\mu\text{m}$ , for both pale and yellow columns (color code  
1590 as before). Ei-iii: Scale bars: 10  $\mu\text{m}$ . **F.** Reconstructed pale R7 and R8, yellow R7 and R8, and



1591 R7-DRA and R8-DRA terminals with R7 presynapses in purple and R8 presynapses in green.  
1592 Note the termination of R8-DRA in the R7 target layer M6 (arrow). Scale bars: 10  $\mu$ m. **G.**  
1593 Illustrations of reconstructed neuron classes, including lamina monopolar (L), distal medulla  
1594 (Dm), medulla intrinsic (Mi), transmedulla (Tm), medulla tangential intrinsic (Mti), visual  
1595 projection neurons targeting the central brain (example: aMe12), and medulla-to-tubercle  
1596 (MeTu) cells, projecting to the anterior optic tubercle (AOTU). **H.** Overview over the relative  
1597 strength of R7 and R8 synaptic connections with different neuron classes (color code as  
1598 before), including unidentified cells (Tables 1-4), across pale, yellow, and DRA columns (pre-  
1599 and post-synaptic), for cells with  $\geq 3$  synapses. Area of circles corresponds to the number of  
1600 synapses per R7 R8 cell.

1601

**A** Synapses in M6

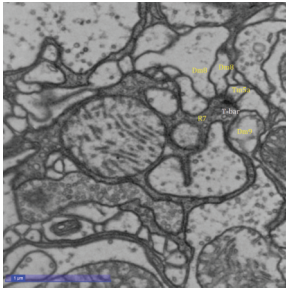

**B** Extramedulla synapses

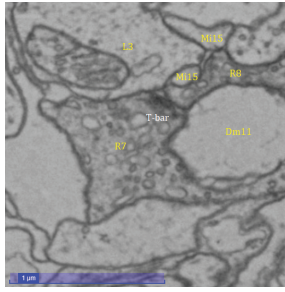

**C** Synapses with glia

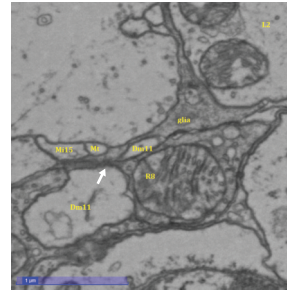

**D** Image registration examples

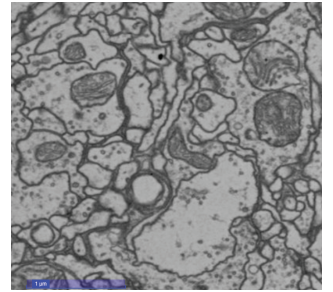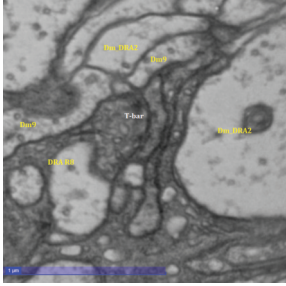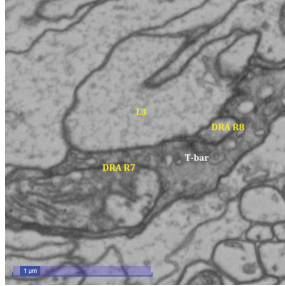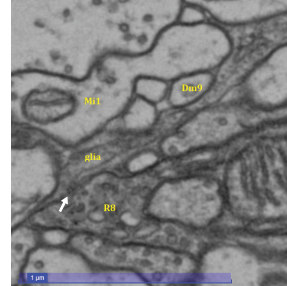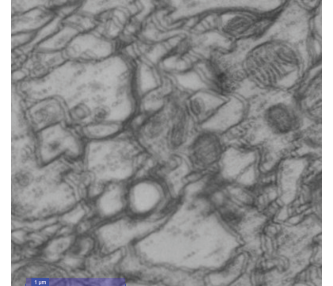

1602 Figure 1 - figure supplement 1: Examples of EM-images

1603 **A.** Examples of EM-images of photoreceptors synapses in medulla layer 6. Top: an R7  
1604 presynapse (T-bar labelled) with postsynaptic Dm8, Dm9 and Tm5a cells. Bottom: an R8-DRA  
1605 presynapse, with postsynaptic Dm9 and DmDRA2 cells. The presence of R8 synapses in layer  
1606 6 was diagnostic of DRA columns (see Materials and Methods). **B.** Images of extramedullar  
1607 synapses in the central eye (top) and DRA (bottom) seed columns. **C.** Photoreceptors  
1608 infrequently but reliably make synapses onto glia. Two examples are shown, with the arrows  
1609 indicating the postsynaptic density in the glial cell. **D.** Very occasionally there were step  
1610 changes in the image registration, which hindered, for example, the complete tracing of all  
1611 three aMe12 cells across the medulla. One example is shown for two spatially close images.  
1612 All scale bars: 1  $\mu\text{m}$ .

1613

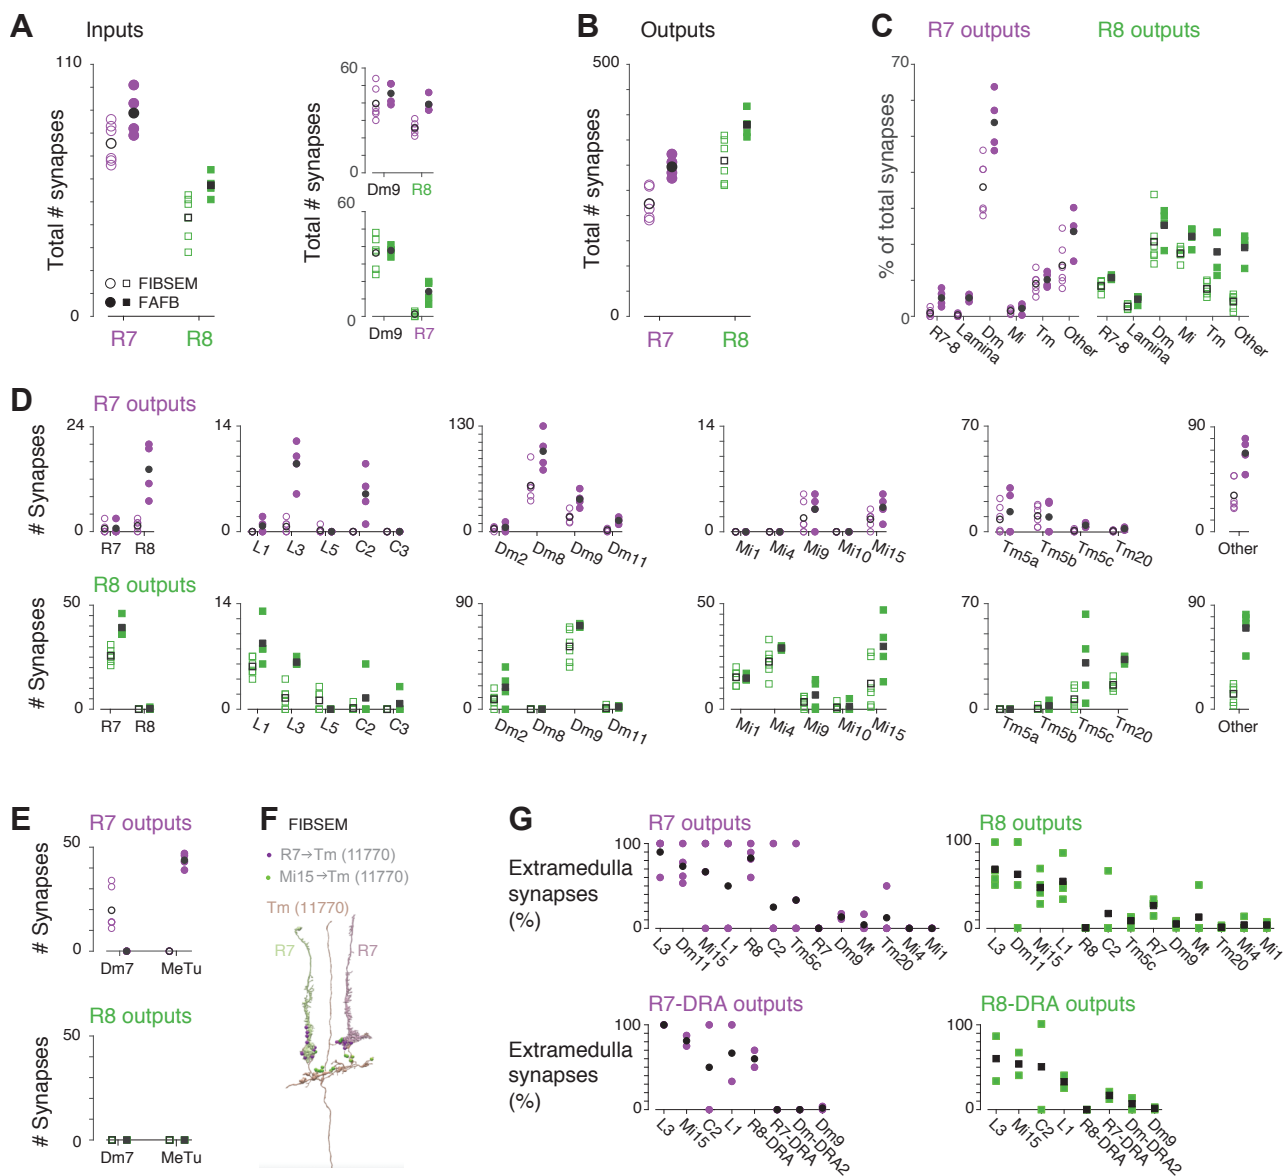

Figure 1 – figure supplement 2

1614 Figure 1 – figure supplement 2: Comparison with medulla FIB-SEM data

1615 **A.** Left: Comparison of total numbers of synaptic inputs to R7 (purple, circles) and R8 (green,  
1616 squares) in our dataset (filled symbols) and a medulla FIB-SEM dataset (open symbols), with  
1617 mean values are indicated by black symbols. These plotting conventions are used throughout  
1618 the figure. We used the six columns identified as pale and yellow in the FIB-SEM dataset by  
1619 Menon et al. (2019), made available in Clements et al. (2020), see Materials and Methods.  
1620 Right: The R7/R8 photoreceptors and Dm9 inputs dominate the synaptic input; the increased  
1621 number of extramedullar synapses (see panel G) accounts for the higher number of inputs to  
1622 our R7/R8 cells. **B.** Comparison of the total number of synapses outputs of R7 and R8. We  
1623 reconstructed more output synapses than in the FIB-SEM dataset, and subsequent plots  
1624 identify the cell types that account for this increase. **C.** Comparison of total numbers of R7/R8  
1625 output synapses disaggregated by cell classes. To enable like-for-like comparisons, we used  
1626 cell classes of cell types present in both datasets, with the cell types shown in D. To quantify  
1627 the completeness of cell type identification, we counted all other identified cell types found in  
1628 the dataset in the ‘Other’ category. There was a large increase in R7 synapses to  
1629 multicolumnar Dm cells, and increases in R8 synapses to multicolumnar cell classes, such as  
1630 Tm cells and cells like aMe12 in the ‘Other’ class. **D.** Comparison of total numbers of R7 (top)  
1631 and R8 (bottom) output synapses disaggregated by cell type, with cell types grouped from left  
1632 to right by their cell class categories in C. For R7, there were increases in synapses to R8 and  
1633 L3, which receive extramedullar synapses, and Dm8 cells, which are multicolumnar. For R8,  
1634 there were increases in synapses to R7 and Mi15, which receive extramedullar synapses, and  
1635 multicolumnar Tm5c and ‘Other’ cell types, and also Tm20 cells, which was surprising because  
1636 this cell type is columnar. **E.** Comparison of R7/R8 synapses to Dm7 and MeTu cells. These  
1637 two cell types were the only cell type discrepancies between the datasets: Dm7 cells were a  
1638 target of R7 in the FIB-SEM data, but not in ours, while MeTu cells were major targets in our  
1639 data but not in the FIB-SEM data. **F.** Example Tm cell (brown, Tm #11770) in the FIB-SEM  
1640 data whose dendritic morphology matched MeTu cell. Two R7 cells (green, left, and purple,  
1641 right), are also shown, along with R7 synapses (green circles) and Mi15 synapses (purple).

1642 We propose that some MeTu cells may be annotated as unidentified Tm or Dm7 cells in the  
1643 FIB-SEM data. **G.** Percentages of extramedullar R7 (top) and R8 (bottom) connections to cell  
1644 types in the central eye (left) and DRA (right) seed columns. L3 in particular is almost  
1645 exclusively innervated outside the medulla. Synapses outside the medulla neuropile were  
1646 present in both the central eye and DRA columns.  
1647

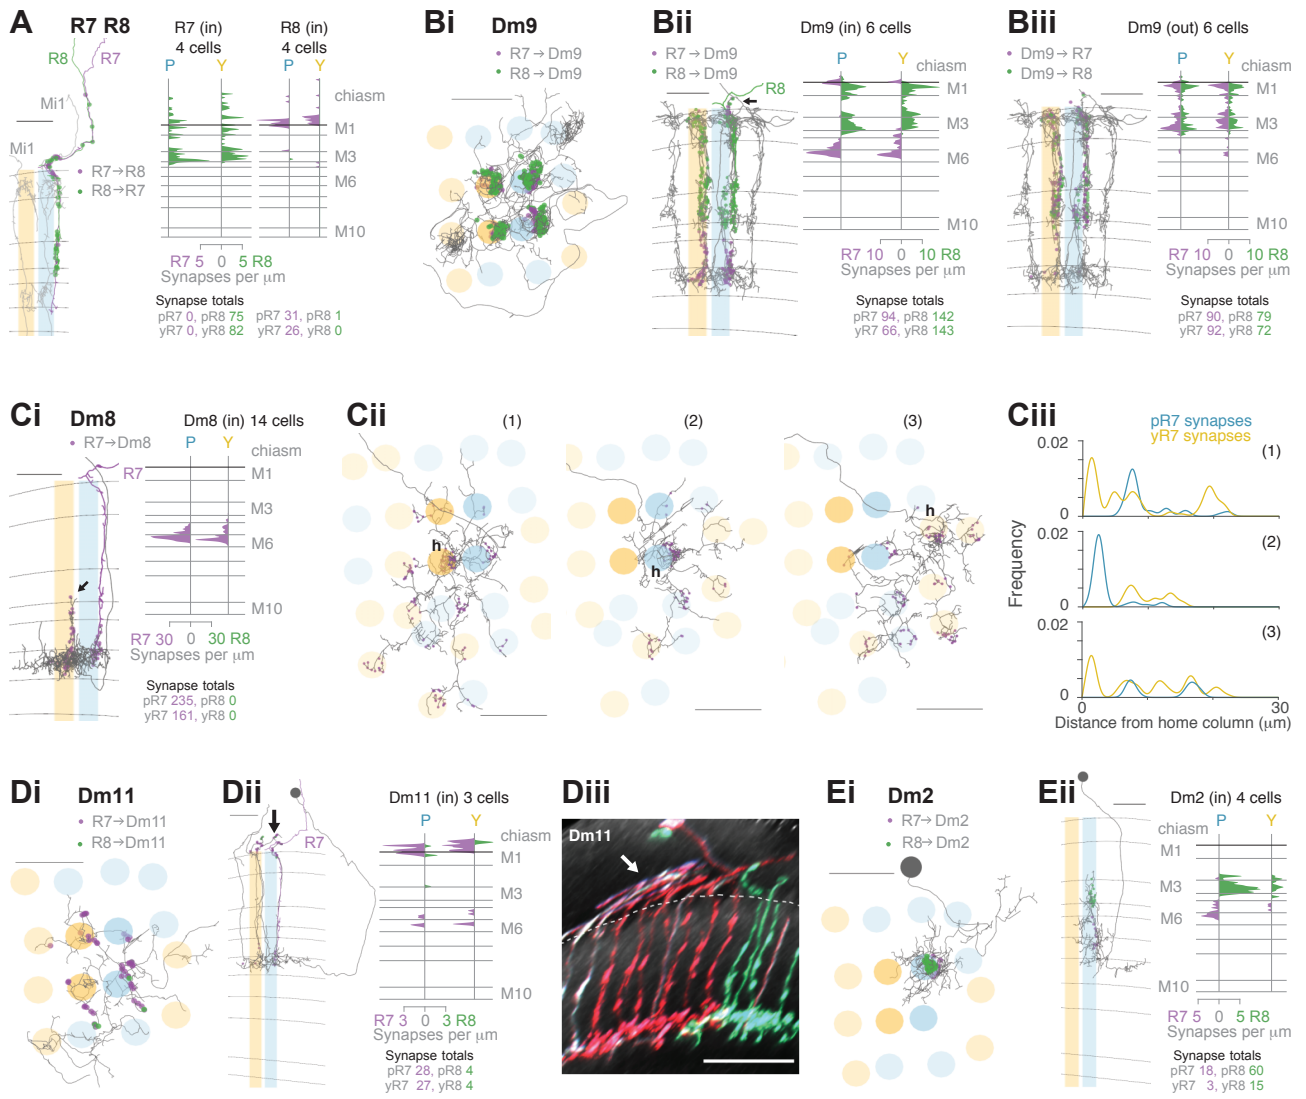

Figure 2



1648 Figure 2: Synapses between R7 and R8 and with Dm neurons in the central medulla

1649 **A.** Synapses between central R7 and R8 cells. Left: Side view of R7 (purple) and R8 (green),  
1650 with R7→R8 synapses (purple points) and R8→R7 synapses (green points). Note synapses  
1651 outside the medulla neuropil (distal to layer M1). Mi1 skeletons (light grey) were used as  
1652 column markers. Scale bar: 10 μm. Right: Synapse distribution (in synapses/μm) in the yellow  
1653 and pale seed columns. **B.** Synapses between R7 and R8 and Dm9 cells. Bi: Top view of a  
1654 fully reconstructed Dm9 skeleton (grey) covering all four central seed columns (darker shading)  
1655 with all R7 (purple) and R8 (green) inputs. Bii, Left: Side view of R7 (purple) and R8 synapses  
1656 (green) to the same Dm9 cell across medulla layers. Right: Layer distribution of photoreceptor  
1657 inputs to six Dm9 cells. Biii, Left: Side view of Dm9→ R7 (purple) and Dm9→R8 (green)  
1658 feedback synapses from the same Dm9 cell. Right: Layer distribution of feedback synapses  
1659 from six Dm9 occupying the seed columns. **C.** Synapses between R7 and Dm8 cells. Ci, Left:  
1660 Side view of R7 synapses (purple) to a fully reconstructed Dm8 cell, with one pale R7 cell is  
1661 shown in purple. Note the characteristic vertical projections of Dm8 in its 'home column' (arrow;  
1662 yellow R7 cell not shown). Right: Layer distribution of R7 inputs from 14 Dm8 cells innervating  
1663 the four seed columns. Cii: Full reconstructions of three Dm8 cells (labeled 1,2,3) innervating  
1664 the four seed columns, with all R7 synapses (purple), including inputs beyond the seed  
1665 columns. Individual Dm8 home columns (h) are marked. Ci-ii Scale bars: 10 μm. Ciii: R7→Dm8  
1666 synapses/μm as a function of their distance from the home column, for the three Dm8 cells  
1667 (1,2,3 above). The cells receive dense innervation in their home column and weaker inputs  
1668 from both pale and yellow R7 cells in their periphery. **D.** Synapses between R7 and Dm11 cells  
1669 with R7 (purple) and R8 (green) synapses from seed columns. Di: Top view of a fully  
1670 reconstructed Dm11 skeleton. Dii, Left: Side view of the layer distribution of photoreceptor  
1671 synapses, including synapses outside the medulla (arrow). Di-ii Scale bars: 10 μm. Right:  
1672 Layer distribution of R7 and R8 inputs to three Dm11 cells. Diii: Rendering of a confocal image  
1673 of MultiColor FlpOut (MCFO) labelled Dm11 cells. Note the characteristic vertical projections  
1674 leaving the medulla neuropile (arrow). The dashed line marks the approximate boundary of the  
1675 medulla neuropile. Scale bar: 20 μm. **E.** Synapses between R7 and R8 and Dm2 cells. Ei: Top

1676 view of a fully reconstructed Dm2 skeleton, with R7 (purple) and R8 (green) synapses. Eii,  
1677 Left: Side view of layer distribution of photoreceptor synapses onto the same Dm2 cell. Ei-ii  
1678 Scale bars: 10  $\mu$ m. Right: Layer distribution of R7 and R8 inputs to four Dm2 cells.  
1679

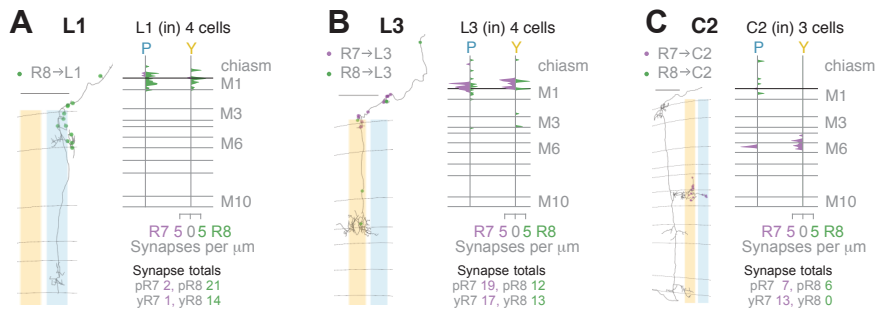

Figure 2 – figure supplement 1

1680 Figure 2 – figure supplement 1: Lamina cell types targeted by central eye R7 and R8

1681 **A.** Left: Side view of a reconstructed L1 cell (gray) with R8→L1 synapses (green). Right: Layer  
1682 distribution (in synapses/μm) of all R7 and R8 inputs to 4 L1 cells. **B.** Left: Side view of a  
1683 reconstructed L3 cell (gray), with R7→L3 (purple) and R8→L3 synapses (green). Right: Layer  
1684 distribution (in synapses/μm) of all R7 and R8 inputs to 4 L3 cells. **C.** Left: Side view of a  
1685 reconstructed C2 cell (gray), with R7→C2 (purple) and R8→C2 synapses (green). Right: Layer  
1686 distribution (in synapses/μm) of all R7 and R8 inputs to 4 C2 cells. **A-C.** All scale bars: 10 μm.  
1687

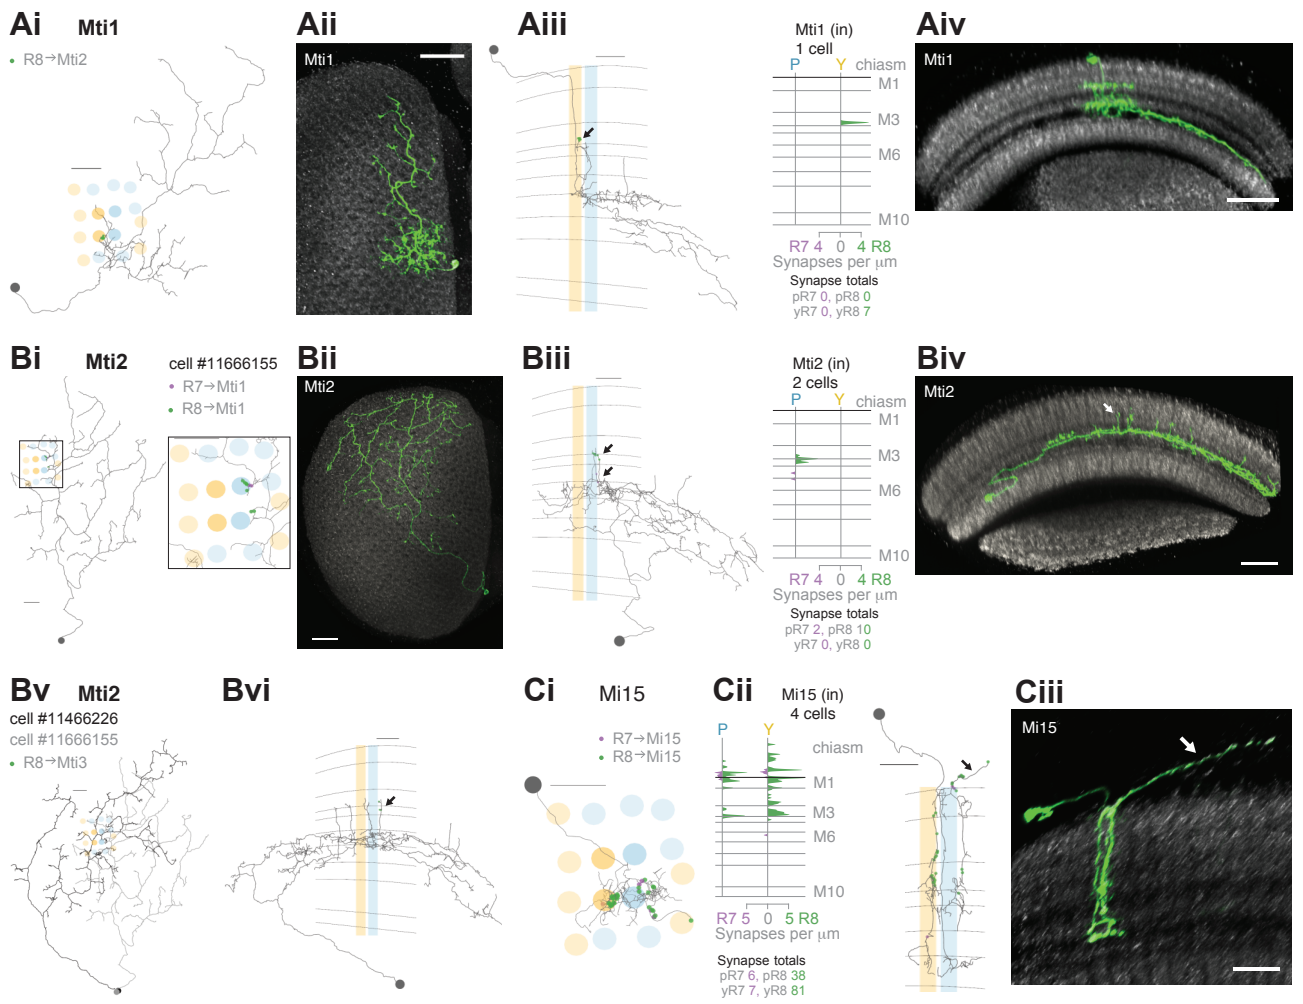

Figure 3

1688 Figure 3: Central eye R7 and R8 connections to Mi and Mti cells

1689 **A.** Synapses of central R7 and R8 with Mti1 cells. Ai: Top view of an Mti1 skeleton with  
1690 synapses from seed column R8 cells (green). Scale bar: 10  $\mu\text{m}$ . Aii: Top view of an MCFO-  
1691 labeled cell matching overall Mti1 morphology. Scale bar: 20  $\mu\text{m}$ . Aiii: Side view of the same  
1692 Mti1 cell and R8 (green) synapses. Scale bar: 10  $\mu\text{m}$ . Aiv: Side view rendering of the same  
1693 light microscopy Mti1 image (green). Scale bar: 20  $\mu\text{m}$ . **B.** Synapses from R7 and R8 to Mti2.  
1694 Bi: Top view of a reconstructed Mti2 cell, with R7 (purple) and R8 (green) synapses. Scale bar:  
1695 10  $\mu\text{m}$ . Bii: Top view of an MCFO-labeled cell matching overall Mti2 morphology. Scale bar:  
1696 20  $\mu\text{m}$ . Biii: Side view of the same Mti2 skeleton as in Bi with R7 (purple) and R8 (green)  
1697 synapses on characteristic vertical projections (arrow). Scale bar: 10  $\mu\text{m}$ . Biv: Side view of the  
1698 cell shown in Bii. Arrow indicates vertical projections. Scale bar: 20  $\mu\text{m}$ . Bv: Top view of a  
1699 second reconstructed Mti2 cell (dark gray) overlaid on the first (pale gray), with R8 (green)  
1700 synapses. Bvi: Side view of the second Mti2 skeleton, with R8 (green) synapses again located  
1701 on vertical projections (arrow). Bv-vi Scale bars: 10  $\mu\text{m}$ . **C.** Synapses of R7 and R8 with Mi15  
1702 cells. Ci: Top view of a fully reconstructed Mi15 skeleton, with R7 (purple) and R8 (green)  
1703 synapses. Cii, left: Side view depicting the layer distribution of photoreceptor synapses (same  
1704 color code) onto the same Mi15 skeleton, with synapses outside the medulla (arrow). Ci-ii  
1705 Scale bars: 10  $\mu\text{m}$ . Right: Layer distribution of R7 and R8 inputs to four Mi15 cells. Ciii: Side  
1706 view rendering of a light microscopy image (MCFO) of an Mi15 cell. Note the long process  
1707 leaving the medulla (arrow). Scale bar: 10  $\mu\text{m}$ .

1708

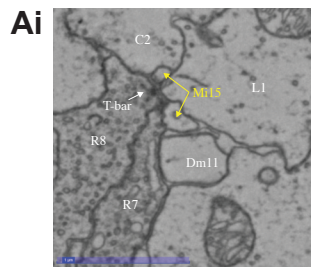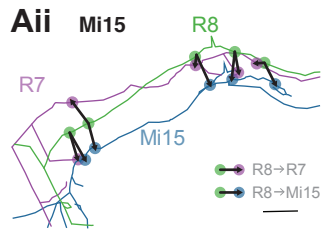

**B** Mi1

- R7→Mi1
- R8→Mi1

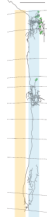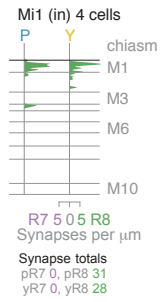

**C** Mi4

- R7→Mi4
- R8→Mi4

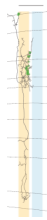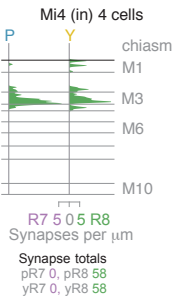

**D** Mi9

- R7→Mi9
- R8→Mi9

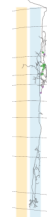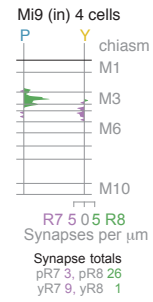



1709 Figure 3 – figure supplement 1: Medulla intrinsic cell types targeted by central eye R7 and R8  
1710 **A.** Colocalization of R8→Mi15 synapses with R8→R7 synapses. Ai. Example EM-image of  
1711 Mi15 and R7 cells as postsynaptic partners of the same R8 presynapse. Scale bar: 1  $\mu\text{m}$ . Aii.  
1712 Magnified view of skeletons of R8, Mi15, and R7 cells in the optic chiasm, illustrating the  
1713 colocalization of R8→Mi15 synapses with R8→R7 synapses at 5 successive locations. Scale  
1714 bar: 1  $\mu\text{m}$ . **B.** Left: Side view of a reconstructed Mi1 cell (gray) with R7→Mi1 (purple) and  
1715 R8→Mi1 synapses (green). Right: Layer distribution (in synapses/ $\mu\text{m}$ ) of all R7 and R8 inputs  
1716 to 4 Mi1 cells. **C.** Left: Side view of a reconstructed Mi4 cell (gray) with R7→Mi4 (purple) and  
1717 R8→Mi4 synapses (green). Right: Layer distribution (in synapses/ $\mu\text{m}$ ) of all R7 and R8 inputs  
1718 to 4 Mi4 cells. **D.** Left: Side view of a reconstructed Mi9 cell (gray) with R7→Mi9 (purple) and  
1719 R8→Mi9 synapses (green). Right: Layer distribution (in synapses/ $\mu\text{m}$ ) of all R7 and R8 inputs  
1720 to 4 Mi9 cells. In the pale seed columns, Mi9 cells received many R8 synapses, but only  
1721 received 1 R8 synapse in the yellow seed columns. **B-D.** Scale bars: 10  $\mu\text{m}$ .  
1722

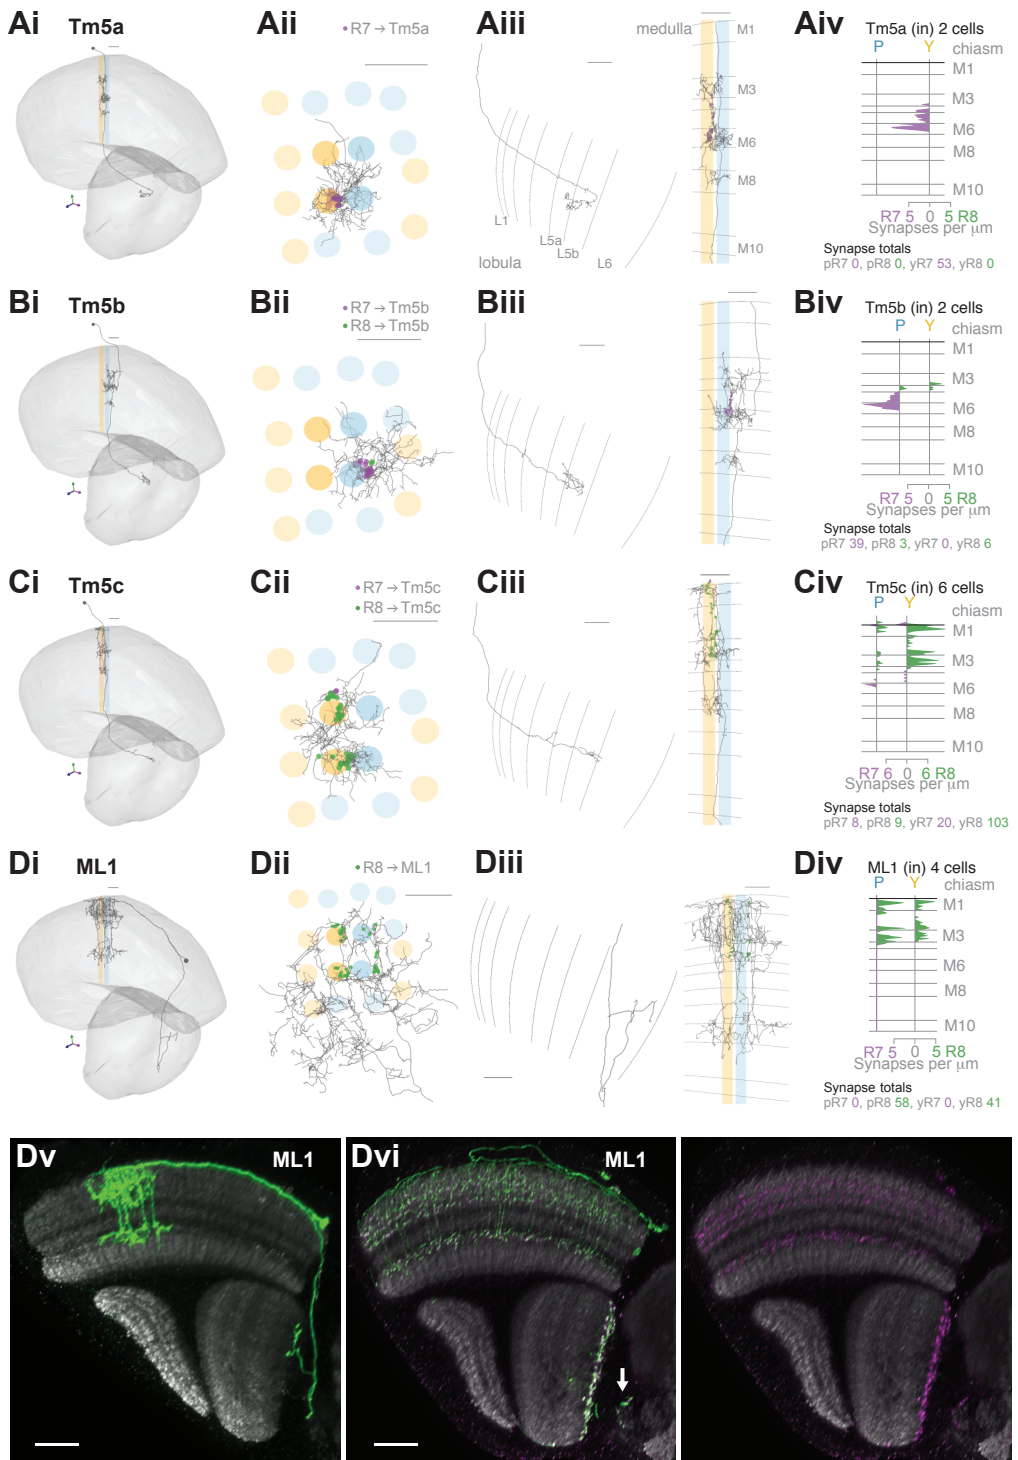

Figure 4

1723 Figure 4: Central eye R7 and R8 connections with cells projecting to the lobula

1724 **A-D.** Synapses between R7 and R8 and Tm5a (A), Tm5b (B), Tm5c (C) and ML1 (D) cell types.

1725 Panels **i-iii**: Anatomy of fully reconstructed cells. **i**: Side view. **ii**: Top view. **iii**, Left: Side view

1726 of axon terminals in the lobula. Right: Side view of medulla branches. R7 synapses are

1727 indicated in purple, R8 synapses in green in **ii**, **iii** (Right). **iv**: Layer distribution of R7 and R8

1728 inputs. Scale bars: 10  $\mu\text{m}$ . **A.** Tm5a. The two Tm5a cells were exclusively targeted by yellow

1729 R7 cells. **B.** Tm5b. The two Tm5b cells were highly biased to pale R7 inputs. **C.** Tm5c. The

1730 five Tm5c cells were highly biased to yellow R8 inputs. **D.** ML1. Dv: Reconstructed side view

1731 of a single MCFO-labeled ML1 cell (Light microscopy). Note this cell has terminals both at the

1732 base of the deepest lobula layer and in the central brain; not all ML1 cells have terminals in

1733 the central brain. Scale bar: 20  $\mu\text{m}$ . Dvi: Reconstructed side view showing the distribution of a

1734 membrane marker (green) and presynaptic marker synaptotagmin-HA (purple) in ML1 cells

1735 imaged as a population. The combined patterns (Left), and the presynaptic marker alone

1736 (Right) are shown. Arrow indicates central brain terminals. Scale bar: 20  $\mu\text{m}$ .

1737

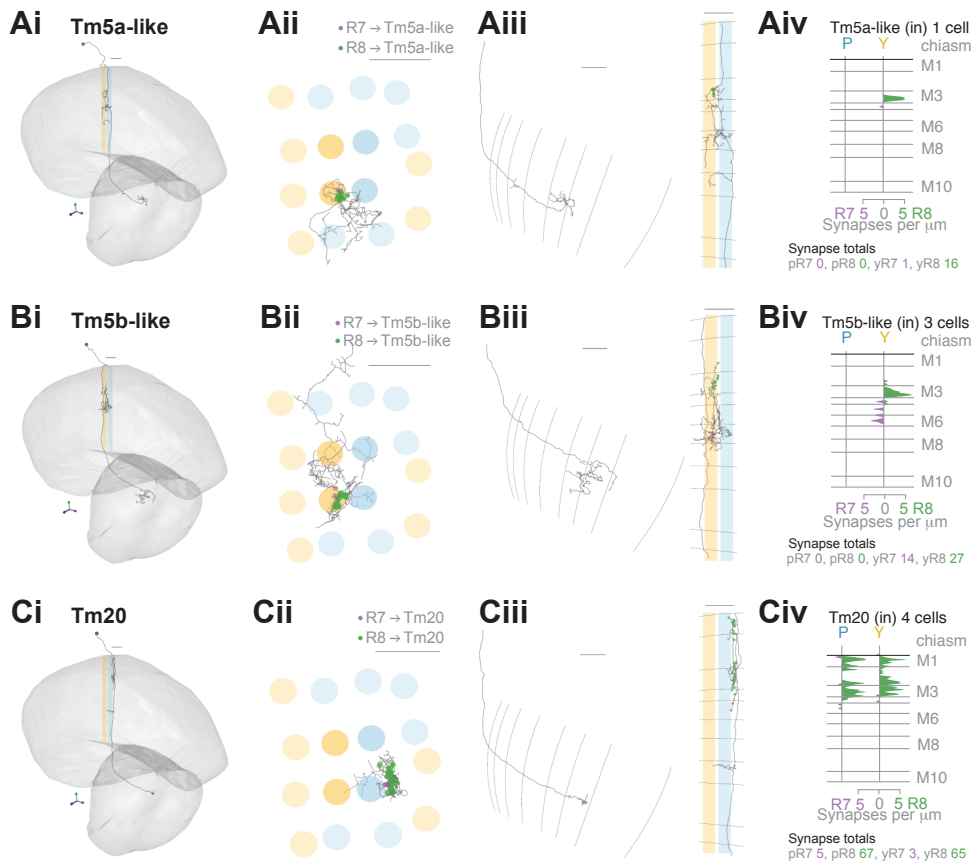

Figure 4 – figure supplement 1

1738 Figure 4 – figure supplement 1: Additional connections of central R7 and R8 to cell types  
1739 projecting into the lobula neuropil

1740 **A.** R7 and R8 connections with the Tm5a-like cell, that has a morphology similar to a Tm5a  
1741 cell, but a different pattern of connectivity. The same reconstructed cell is shown in Ai-iii. Ai:  
1742 Side view. Aii: Top view with R7 (purple) and R8 (green) synapses. Aiii: Left: The axon  
1743 terminals in the lobula. Right: Side view with R7 (purple) and R8 (green) synapses. Aiv: Layer  
1744 distribution (in synapses/ $\mu\text{m}$ ) of all R7 and R8 inputs from four seed columns to the Tm5a-like  
1745 cell. **B.** R7 and R8 connections with three Tm5b-like cells, that each have a morphology similar  
1746 to a Tm5b cell, but a different, shared pattern of connectivity. The same reconstructed Tm5b-  
1747 like cell is shown in Bi-iii. Bi: Side view. Bii: Top view with R7 (purple) and R8 (green)  
1748 synapses. Biii: Left: The axon terminals in the lobula. Right: Side view with R7 (purple) and R8  
1749 (green) synapses. Biv: Layer distribution (in synapses/ $\mu\text{m}$ ) of all R7 and R8 inputs from four  
1750 seed columns to the three Tm5b-like cells. Unlike the Tm5b cells, the Tm5b-like cells are  
1751 predominantly targeted by yellow R8 photoreceptors. **C.** R7 and R8 connections with Tm20  
1752 cells. The same reconstructed Tm20 cell is shown in Ci-iii. Ci: Side view. Cii: Top view with  
1753 R7 (purple) and R8 (green) synapses. Ciii: Left: The axon terminals in the lobula. Right: Side  
1754 view with R7 (purple) and R8 (green) synapses. Civ: Layer distribution (in synapses/ $\mu\text{m}$ ) of all  
1755 R7 and R8 inputs from four seed columns to the four Tm20 cells. **A-C.** Scale bars: 10  $\mu\text{m}$ .  
1756

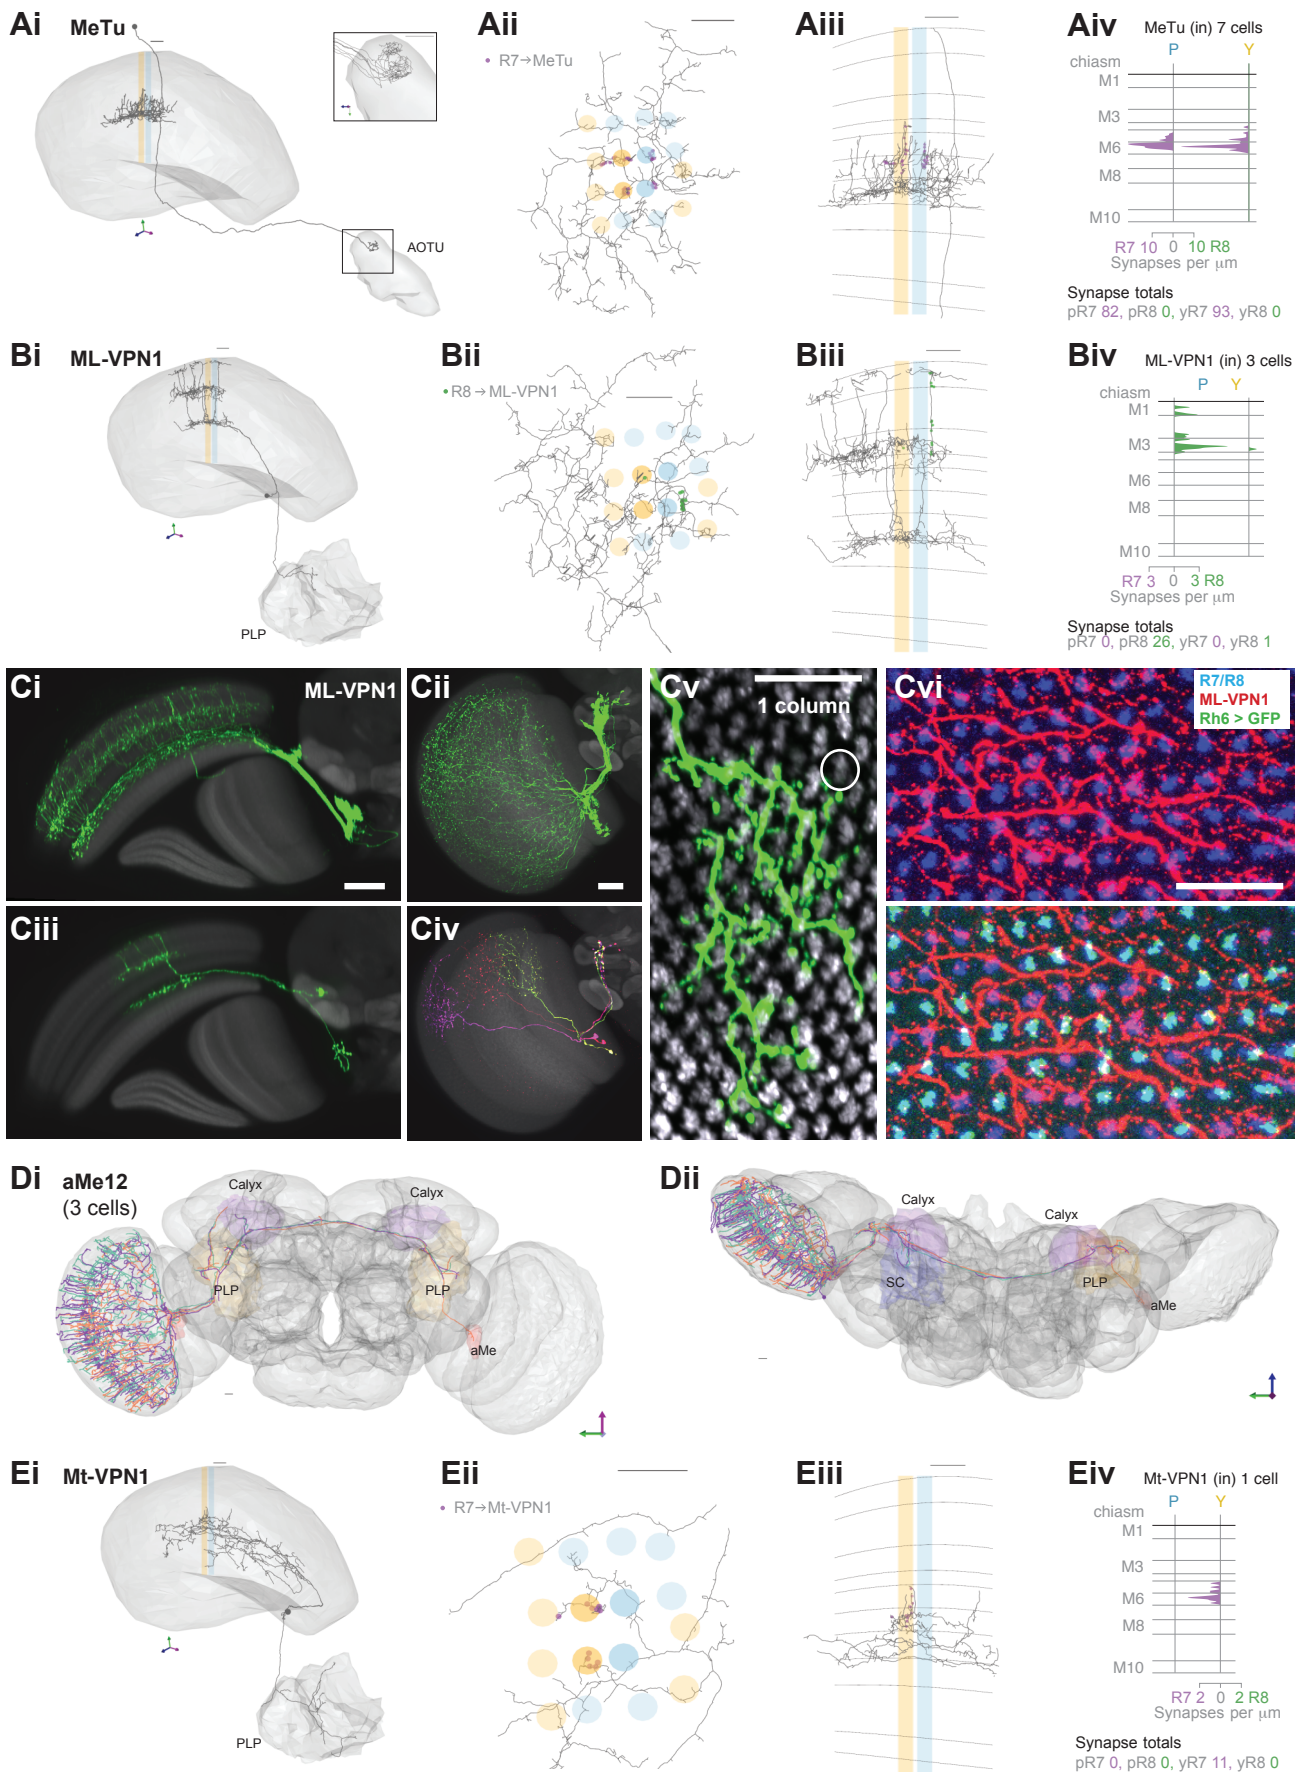

Figure 5



1757 Figure 5: Interneurons connecting central eye R7 and R8 with the central brain

1758 **A,B,E.** Synapses between R7 and R8 and MeTu (A), ML-VPN1 (B) and Mt-VPN1 (E) cells.  
1759 Panels **i-iii**: Anatomy of reconstructed cells. **i**: Side view. **ii**: Top view. **iii**: Side view of medulla  
1760 branches. R7 synapses are indicated in purple, R8 synapses in green in **ii**, **iii**. **iv**: Layer  
1761 distribution of R7 and R8 inputs. Scale bars: 10  $\mu$ m. **A.** The MeTu cell shown was fully  
1762 reconstructed. **Ai.** Inset shows a magnified view of axon projections to the AOTU. **Aiv**: All seven  
1763 MeTu cells were exclusively R7 targets. **B.** The ML-VPN1 cell shown was fully reconstructed.  
1764 **Bi.** ML-VPN1 cells project to the PLP. **Biv.** Both ML-VPN1 cells were pale R8 targets. **Ci-vi**:  
1765 Light microscopy of ML-VPN1 anatomy. **Ci,Cii**: Side view (**Ci**) and top view (**Cii**) of the  
1766 population of ML-VPN1 cells. **Ciii**: Side view of a single MCFO-labeled ML-VPN1 cells. **Civ**:  
1767 Top view of multiple MCFO-labeled ML-VPN1 cells. **Cv**: Overlay of arbors of a single cell ML-  
1768 VPN1 cell with L2 terminals (gray) indicating medulla columns. Images in **Ci-Cv** show overlays  
1769 of aligned confocal images with the standard brain used for registration (**Ci-iv**) or a second  
1770 registered image showing L2 terminals (**Cv**). **Cvi**: Confocal substack projection showing  
1771 medulla columns at approximately the level of R8 terminals. ML-VPN1 (red) and photoreceptor  
1772 axons (blue) are shown without (top) and with (bottom) labelling of yellow R8 axons (Rh6 >  
1773 green). Overlap between ML1 and photoreceptor is largely limited to pale columns (i.e.  
1774 columns without the Rh6 marker). **Cv-vi** Scale bars: 20  $\mu$ m. **D.** Reconstructions of three aMe12  
1775 cells (orange, green, purple) covering the entire medulla, with axons leaving via the accessory  
1776 medulla and innervating the mushroom body calyces (Calyx) and the PLP and accessory  
1777 medulla (aMe) of both hemispheres. **Di**: Frontal view. **Dii**: Dorsal view. **E.** Mt-VPN1 cells. **Eiv**:  
1778 Tracing of Mt-VPN1 photoreceptor synapses in 16 additional columns did not confirm yellow  
1779 specificity found in the seed columns.

1780



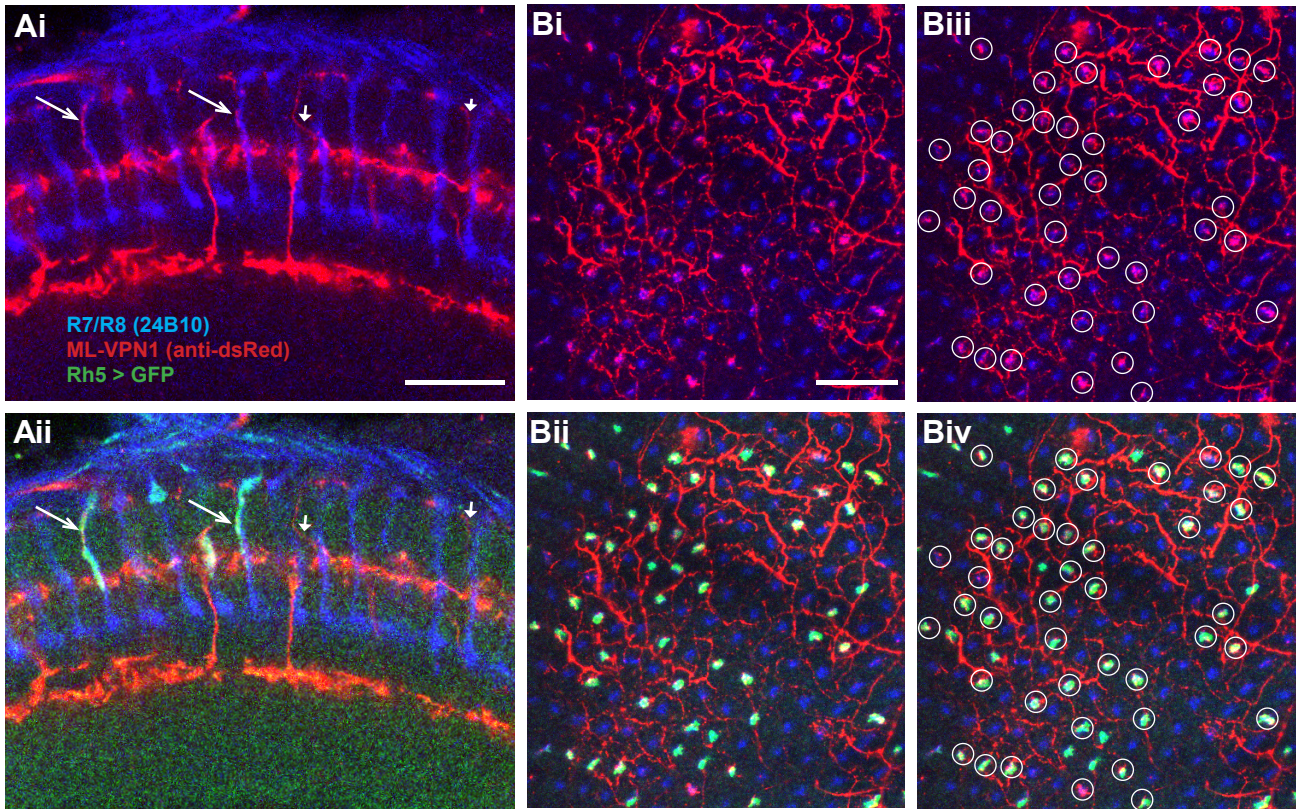

Figure 5 – figure supplement 1

1781 Figure 5 – figure supplement 1: Pale specificity of ML-VPN1 in the central eye seed columns

1782 **A.** Side view of R7 and R8 photoreceptors (blue) and ML-VPN1 cells (red), without (Ai) and  
1783 with (Aii) Rh5 expression (green). Ai. Four vertical processes that traverse layers 1-3 are  
1784 labelled by arrows. In our EM reconstructions the photoreceptor synapses were largely located  
1785 on such characteristic processes. Most vertical processes that followed photoreceptors, such  
1786 as the two examples indicated by long, open arrows were in pale (Rh5-positive) columns.  
1787 Other vertical processes that did not follow photoreceptors (short, closed arrows) were also  
1788 frequently found in yellow (Rh5-negative) columns or could not be readily assigned to a  
1789 column. **B.** Projection through a few adjacent confocal slices showing ML-VPN1 and  
1790 photoreceptor axons at approximately the level of R8 terminals, with color labelling as in A.  
1791 without (Bi) and with (Bii) pale R8 columns labelled by the Rh5 marker. Overlap between ML1  
1792 and R-cells is largely limited to pale columns. For example, out of 43 putative overlaps circled  
1793 (Biii), only four did not overlap with pale R8 expression (Biv), indicating that 93% of putative  
1794 innervated columns were of a pale fate in this image. **A-B** Scale bars: 20  $\mu\text{m}$ .

1795

**Ai** OA-AL2i3

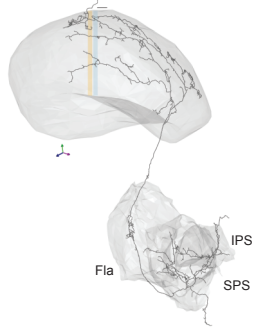

**Aii**

- R8→OA-AL2i3
- R7→OA-AL2i3

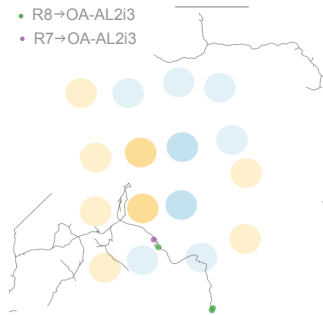

**Aiii**

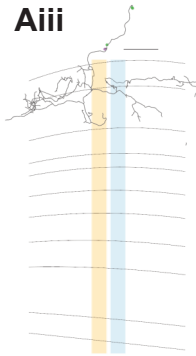

**Bi** Mt-VPN2

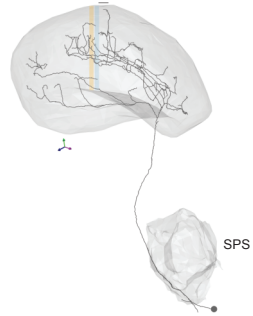

**Bii**

- R8→Mt-VPN2

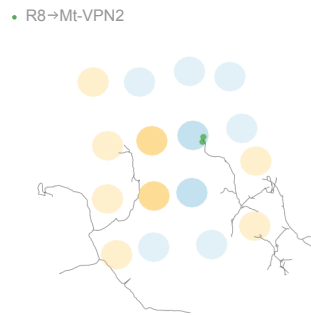

**Biii**

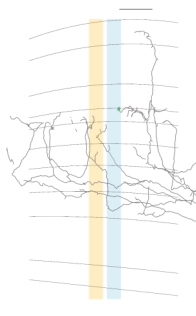

**Ci** Mt-VPN3

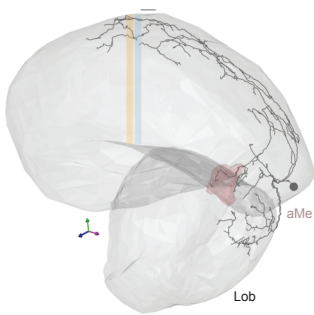

**Cii**

- R8→Mt-VPN3

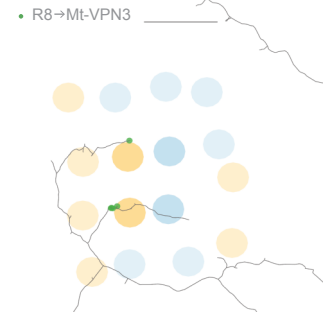

**Ciii**

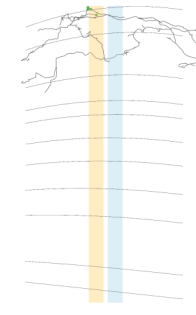

**Di** Mt-VPN4

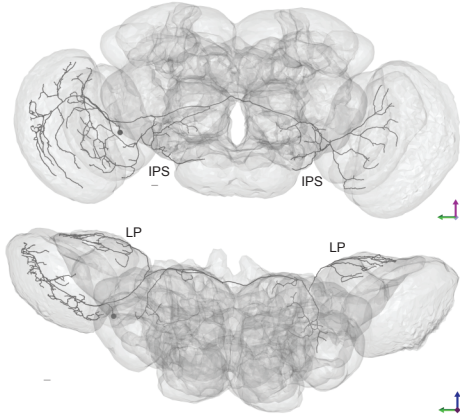

**Dii**

- R8→Mt-VPN4

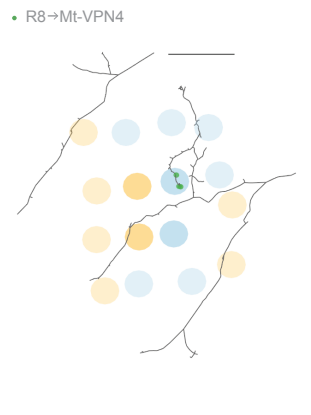

**Diii**

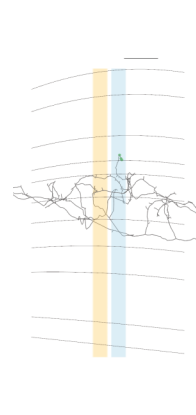

1796 Figure 5 – figure supplement 2: Weakly connected visual projection neurons connecting central  
1797 eye R7 and R8 to the central brain

1798 **A.** R7 and R8 connections with a Mt-VPN matching the anatomy of a known octopaminergic  
1799 cell type (OA-AL2i3). The same reconstructed cell is shown in Ai-iii. Ai: Side view, showing the  
1800 projections to the flange (Fla), inferior posterior slope (IPS), and superior posterior slope (SPS).  
1801 Aii: Top view with R7 (purple) and R8 (green) synapses. Aiii: Side view with R7 (purple) and  
1802 R8 (green) synapses. The cell has processes leaving the medulla that track the  
1803 photoreceptors, where it received synaptic input in our seed columns. **B.** R8 connections with  
1804 the reconstructed Mt-VPN2 cell. Bi: Side view, showing the projection to the SPS. Bii: Top  
1805 view with R8 (green) synapses. Biii: Side view with R8 (green) synapses. **C.** R8 connections  
1806 with the reconstructed Mt-VPN3 cell. Ci: Side view, showing the projections to the lobula (Lob)  
1807 and accessory medulla (aMe). Cii: Top view with R8 (green) synapses. Ciii: Side view with R8  
1808 (green) synapses. **D.** R8 connections with the reconstructed Mt-VPN4 cell, which is also a  
1809 heterolateral lobula late tangential cell. Di: Side view, showing the projections to the lobula  
1810 plate (LP) and IPS in both hemispheres. Dii: Top view with R8 (green) synapses. Diii: Side  
1811 view with R8 (green) synapses. **A-D.** Scale bars: 10  $\mu\text{m}$ .

1812

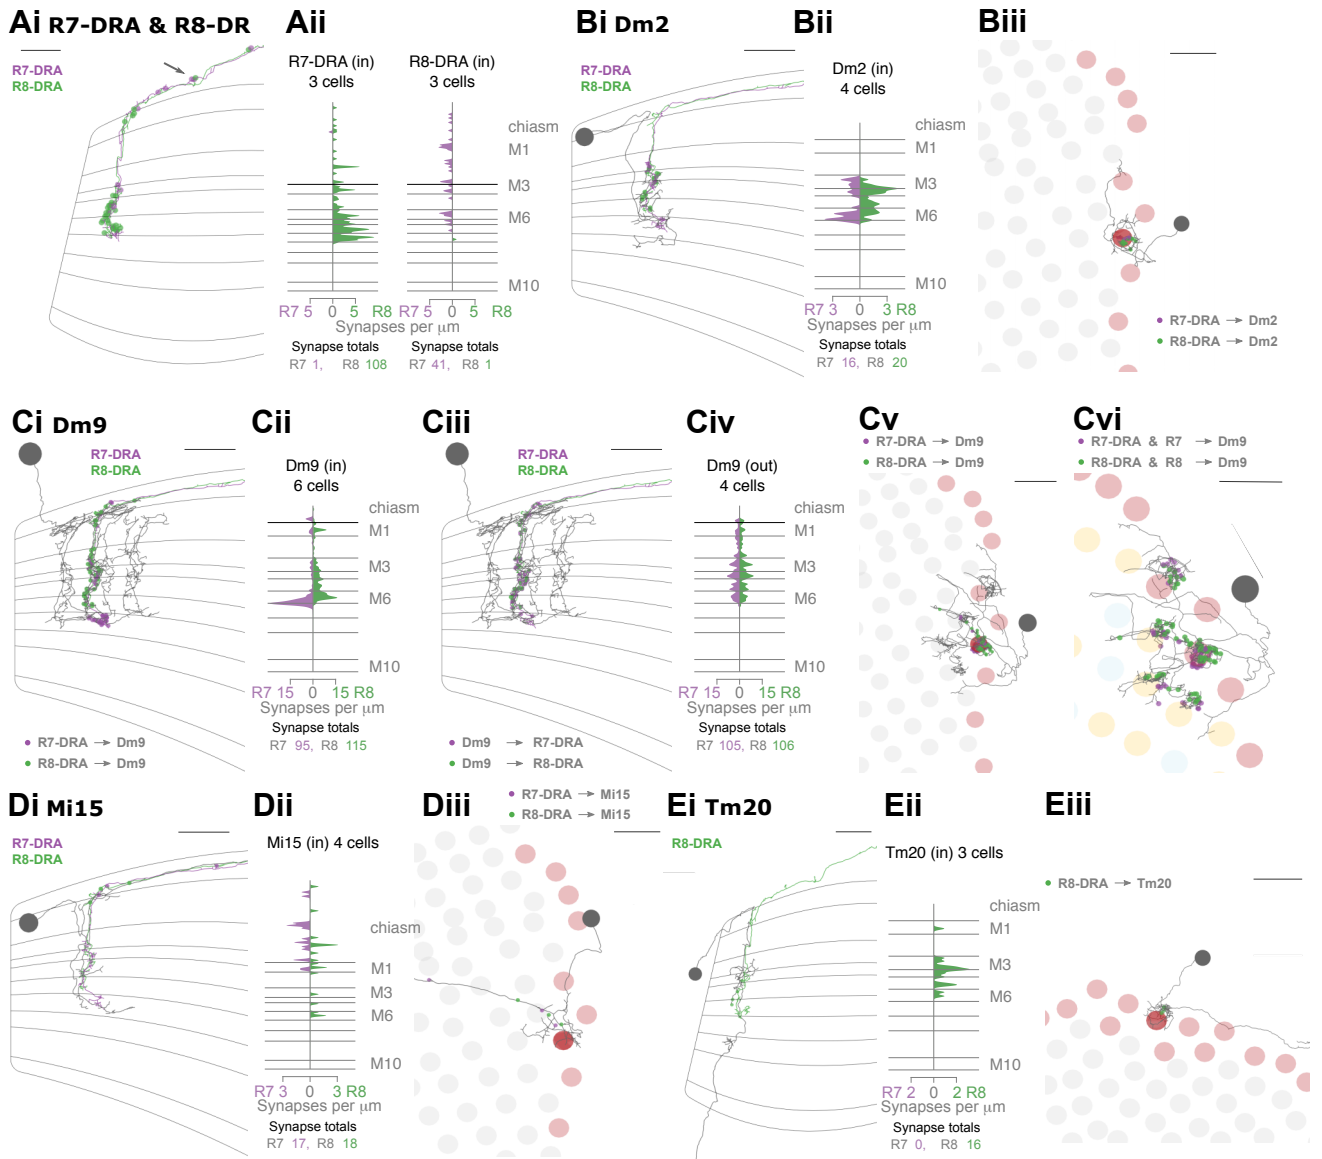

Figure 6



1813 Figure 6: Synapses of R7 and R8 with each other and different medulla cell types in the DRA  
1814 **A.** Reciprocal synapses between R7 and R8 in the DRA. Ai: Side view of an R7- and R8-DRA  
1815 cell with R7-DRA→R8-DRA (purple points) and R8-DRA→R7-DRA (green points) Aii: Layer  
1816 distribution of R7-DRA and R8-DRA reciprocal synapses in three columns. **B.** Synapses  
1817 between DRA R7 and R8 photoreceptors and Dm2 cells. Bi: Reconstruction of a Dm2 cell  
1818 with synapses from R7-DRA (purple) and R8-DRA (green). Bii: Layer distribution of R7-DRA  
1819 and R8-DRA synapses onto 4 Dm2 cells. Biii: Top view of Dm2 skeleton in the DRA. **C.**  
1820 Reciprocal synapses between Dm9 cells in the DRA and R7-DRA / R8-DRA. Ci: Side view of  
1821 a fully reconstructed Dm9 skeleton (grey) in the DRA region, with R7-DRA→Dm9 synapses  
1822 (purple) and R8-DRA→Dm9 synapses (green). Cii: Layer distribution of DRA photoreceptor  
1823 inputs into Dm9. Ciii: Feedback synapses from Dm9 to R7-DRA (purple) and R8-DRA (green)  
1824 photoreceptors. Civ: Layer distribution of Dm9 inputs into DRA inner photoreceptors. Cv: Top  
1825 view of a Dm9 cell that connects to photoreceptors in both DRA (light red) and non-DRA  
1826 columns (grey). Synapses from R7-DRA (purple) and R8-DRA (green) are indicated. Cvi: DRA  
1827 and non-DRA R7 (purple) and R8 (green) inputs into the same Dm9 as in (Cv). **D.** Synapses  
1828 between DRA R7 and R8 and Mi15. Di: Side view of a reconstructed Mi15 with R7-DRA→Mi15  
1829 synapses (purple) and R8-DRA→Mi15 synapses (green). Dii: Layer distribution of R7-DRA and  
1830 R8-DRA input to 4 Mi15 cells. Diii: Top view of Mi15 skeleton in the DRA. **E.** Synapses between  
1831 DRA R7 and R8 photoreceptors and Tm20 cells. Ei: Side view of a reconstructed Tm20 with  
1832 R8-DRA→Mi15 synapses in green. Eii: Layer distribution of R8-DRA input to 3 Tm20 cells. Eiii:  
1833 Top view of Tm20 skeleton in the DRA. (All scale bars: 10 μm).

1834

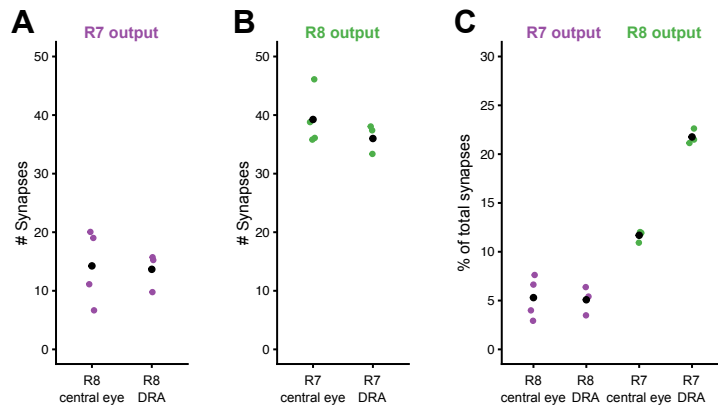

Figure 6 – figure supplement 1



1835 Figure 6 - figure supplement 1: Reciprocal synapses of R7 and R8 in the central eye and the

1836 DRA

1837 **A.** Total number of R7 synapses onto R8 for all full reconstructed cells in the central eye (4)

1838 and the DRA (3). **B.** Total number of R8 synapses onto R7 for all full reconstructed cells in the

1839 central eye (4) and the DRA (3). **C.** Fraction of photoreceptor-to-photoreceptor synapses of

1840 the total output of R7 and R8 in the central eye and the DRA.

1841

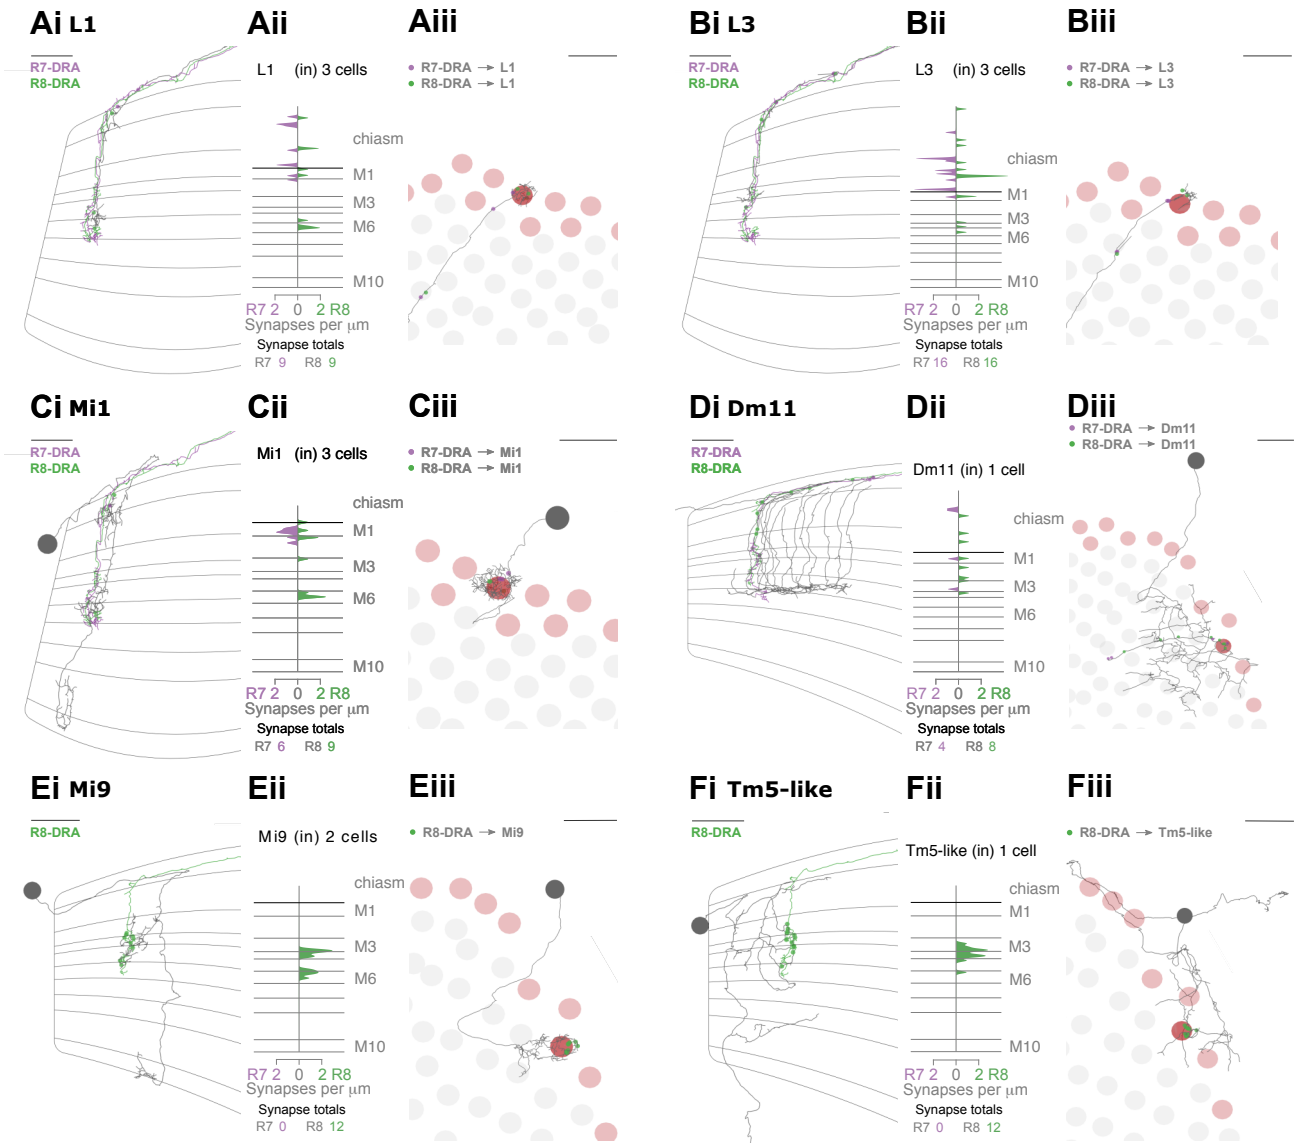

Figure 6 – figure supplement 2

1842 Figure 6 – figure supplement 2: additional cell types connected to R7 and R8 in the DRA with  
1843 lower synaptic strength

1844 **A.** Synapses between DRA photoreceptors and L1. Ai: Side view of a reconstructed L1  
1845 skeleton (dark grey), together with R7-DRA (purple) and R8-DRA (green) from the same  
1846 column plus R7-DRA→L1 synapses (purple) and R8-DRA→L1 synapses (green). Aii: Synapse  
1847 distribution (in synapses/ $\mu\text{m}$ ) of all three reconstructed L1 cells from the three DRA seed  
1848 columns across medulla layers. Aiii Top view of the same L1 cell with R7-DRA→L1 synapses  
1849 (purple) and R8-DRA→L1 synapses (green). **B.** Synapses between DRA photoreceptors and  
1850 L3. Bi: Side view of a reconstructed L3 skeleton (dark grey), together with R7-DRA (purple)  
1851 and R8-DRA (green) from the same column plus R7-DRA→L3 synapses (purple) and R8-  
1852 DRA→L3 synapses (green). Bii: Synapse distribution (in synapses/ $\mu\text{m}$ ) of all three  
1853 reconstructed L3 cells from the three DRA seed columns across medulla layers. Biii Top view  
1854 of the same L3 cell with R7-DRA→L3 synapses (purple) and R8-DRA→L3 synapses (green).  
1855 **C.** Synapses between DRA photoreceptors and Mi1. Ci: Side view of a reconstructed Mi1  
1856 skeleton (dark grey), together with R7-DRA (purple) and R8-DRA (green) from the same  
1857 column plus R7-DRA→Mi1 synapses (purple) and R8-DRA→Mi1 synapses (green). Cii:  
1858 Synapse distribution (in synapses/ $\mu\text{m}$ ) of all three reconstructed Mi1 cells from the three DRA  
1859 seed columns across medulla layers. Ciii Top view of the same Mi1 cell with R7-DRA→Mi1  
1860 synapses (purple) and R8-DRA→Mi1 synapses (green). **D.** Synapses between DRA  
1861 photoreceptors and Dm11. Di: Side view of a reconstructed Dm11 skeleton (dark grey),  
1862 together with R7-DRA (purple) and R8-DRA (green) from the same column plus R7-  
1863 DRA→Dm11 synapses (purple) and R8-DRA→Dm11 synapses (green). Dii: Synapse  
1864 distribution (in synapses/ $\mu\text{m}$ ) of one reconstructed Dm11 cells from the three DRA seed  
1865 columns across medulla layers. Note that synapses between PR→Dm11 were only found in  
1866 one of the three DRA seed columns. Diii Top view of the same Dm11 cell with R7-DRA→Dm11  
1867 synapses (purple) and R8-DRA→Dm11 synapses (green). **E.** Synapses between R8-DRA and  
1868 Mi9. Ei: Side view of a reconstructed Mi9 skeleton (dark grey), together with R8-DRA (green)  
1869 from the same column plus R8-DRA→Mi9 synapses (green). Eii: Synapse distribution (in

1870 synapses/ $\mu\text{m}$ ) of two reconstructed Mi9 cells from the three DRA seed columns across medulla  
1871 layers. Note that only in two of the three DRA seed columns PR $\rightarrow$ Mi9 synapses were found.  
1872 Eiii Top view of the same Mi9 cell with R8-DRA $\rightarrow$ Mi9 synapses (green). F. Synapses between  
1873 R8-DRA and a Tm5-like cell. Fi: Side view of the reconstructed Tm5-like skeleton (dark grey),  
1874 together with R8-DRA (green) from the same column plus R8-DRA $\rightarrow$  Tm5-like synapses  
1875 (green). Fii: Synapse distribution (in synapses/ $\mu\text{m}$ ) of the one Tm5-like cell from the three DRA  
1876 seed columns across medulla layers. Note that only in one of the three DRA seed columns  
1877 such a cell was found. Fiii Top view of the same Tm5-like cell with R8-DRA $\rightarrow$ Tm5-like  
1878 synapses (green).  
1879

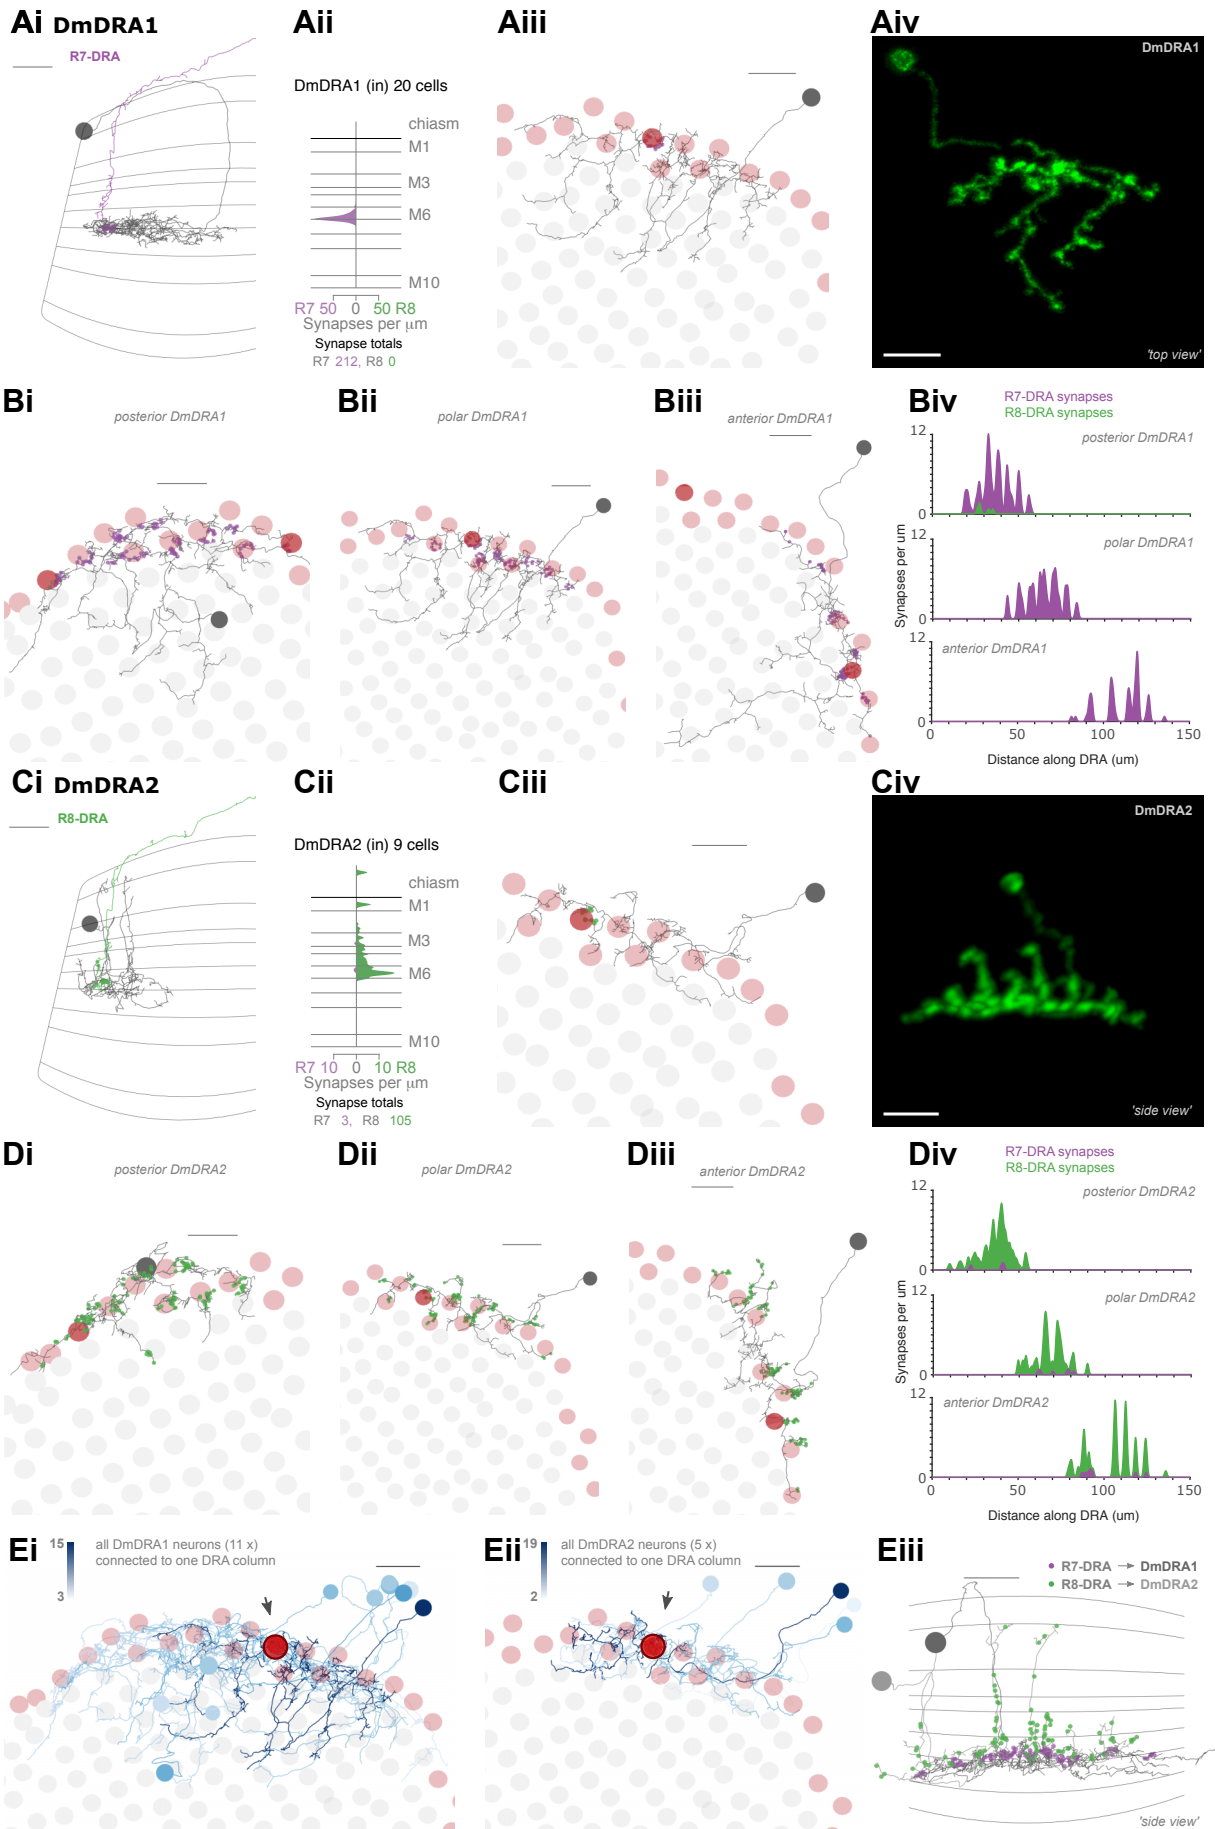

Figure 7

1880 Figure 7: Dm8-like cells in the DRA

1881 **A.** Synapses between photoreceptors and Dm-DRA1 cells. Ai: Side view of a reconstructed  
1882 Dm-DRA1 (grey) innervated by DRA.R7 (purple). Aii: Distribution of DRA.R7 synapses (purple)  
1883 onto 20 Dm-DRA1 cells, plotted across medulla layers. Aiii: Top view of the same fully  
1884 reconstructed Dm-DRA1 skeleton and R7-DRA inputs from the seed column (purple). Aiv: Top  
1885 view of a light microscopic Dm-DRA1 single cell clone with processes leaving the DRA. **B.** R7-  
1886 DRA inputs into Dm-DRA1 cells. Bi-iii: Three skeletons of fully reconstructed Dm-DRA1 cells  
1887 (grey) at different positions along the DRA (posterior, polar and anterior) with all R7-DRA  
1888 synapses (purple) originating from an average of 11 columns. Biv: Distribution of R7-DRA  
1889 synapses onto the three Dm-DRA1 cells from Bi-iii along the DRA. **C.** Synapses between  
1890 photoreceptors and Dm-DRA2 cells. Ci: Side view of one reconstructed Dm-DRA2 skeleton  
1891 (grey) innervated by R8-DRA (green). Cii: Layer distribution of DRA photoreceptor synapses  
1892 onto 9 Dm-DRA2 cells. Ciii: Top view of the same fully reconstructed Dm-DRA2 skeleton and  
1893 photoreceptor inputs from the seed column. Civ: Side view of a light microscopic Dm-DRA2  
1894 single cell clone with vertical processes. **D.** Photoreceptor inputs into Dm-DRA2 cells. Di-iii:  
1895 Three skeletons of fully reconstructed Dm-DRA2 cells (grey) at different positions along the  
1896 DRA (posterior, polar and anterior) with all R8-DRA (green) synapses originating from an  
1897 average of 11 columns. Div: Distribution of R8-DRA (and few R7-DRA) synapses onto the  
1898 three Dm-DRA2 cells from Di-iii along the DRA. **E.** Comparison of Dm-DRA1 and Dm-DRA2  
1899 connectivity. All reconstructed Dm-DRA1 skeletons connected to the same R7-DRA cell  
1900 (circled column, arrow). The saturation of blue color indicates strength of connectivity (from 3  
1901 to 15 synapses). Eii: Summary all Dm-DRA2 skeletons connected to the same R8-DRA (circled  
1902 column, arrow), blue color indicates the strength of connectivity (from 2 to 19 synapses). Eiii:  
1903 Side views of overlapping Dm-DRA1 and Dm-DRA2 cell skeletons with all R7-DRA and R8-  
1904 DRA synapses (same cells as in Bii and Dii). (All scale bars: 10  $\mu$ m).

1905

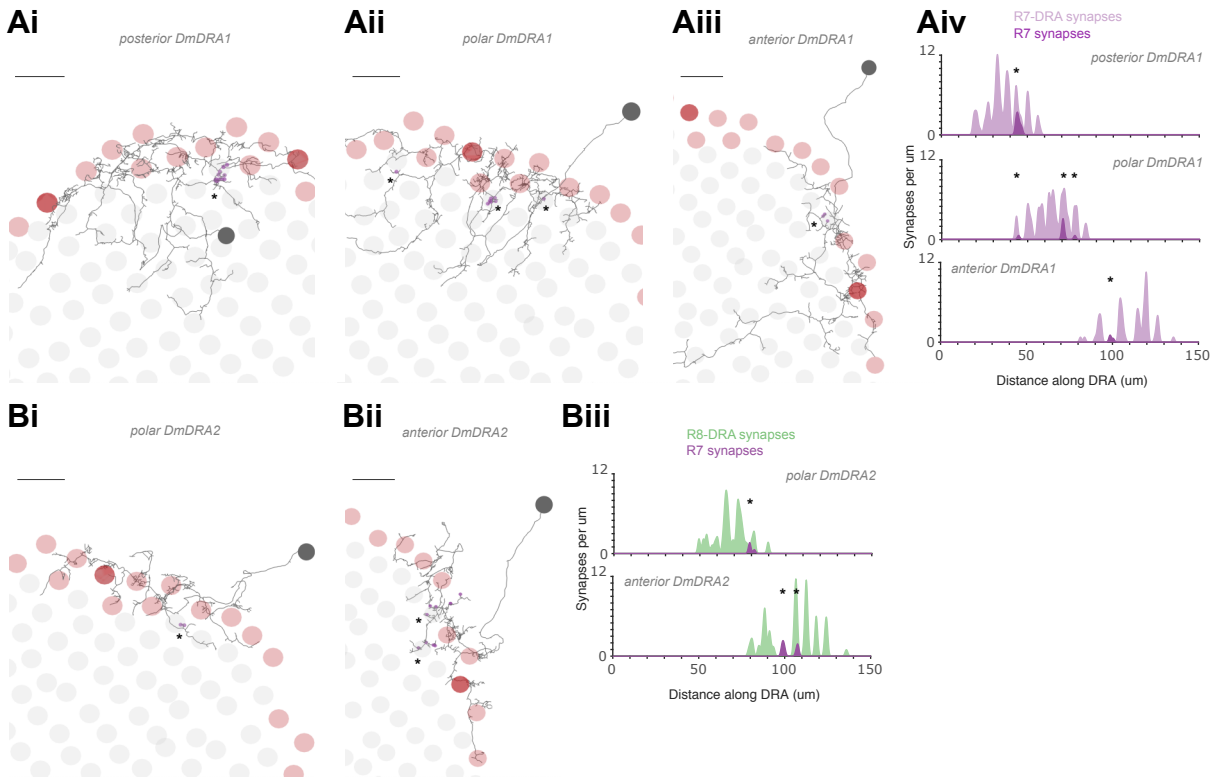

Figure 7 – figure supplement 1



1906 Figure 7 – figure supplement 1: non-DRA photoreceptor inputs into Dm-DRA cells

1907 **A.** Top view (Ai-Aiii) of three fully traced Dm-DRA1 cells (same as in Figure 7B) with all non-  
1908 DRA R7 inputs marked (purple dots), as well as distribution of synapses along te DRA (Aiv).  
1909 Note the strong inputs into the posterior Dm-DRA1 cell, originating from an ommatidium cell at  
1910 the DRA/non-DRA boundary, with a putative ‘mixed’ fate (Ai). **B.** Top view (Bi-Biii) of three fully  
1911 traced Dm-DRA2 cells (same as in Figure 7D) with all non-DRA R7 inputs marked (purple  
1912 dots), as well as distribution of synapses along te DRA (Biv).

1913

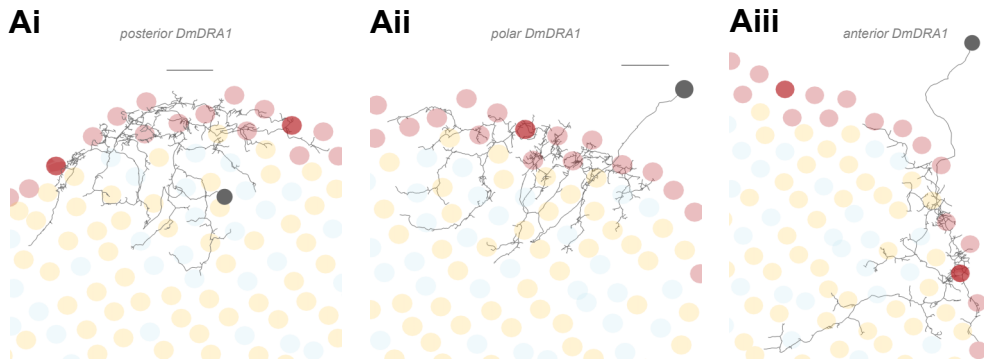

Figure 7 – figure supplement 2

1914 Figure 7 – figure supplement 2: deep projections of Dm-DRA cells

1915 **A.** Top view (Ai-Aiii) of three fully traced Dm-DRA1 cells (same as in Figure 7B) with pale and  
1916 yellow fates of all non-DRA ommatidia indicated. Deep projections of Dm-DRA1 cells do not  
1917 seem to show any obvious preference for pale or yellow columns.

1918

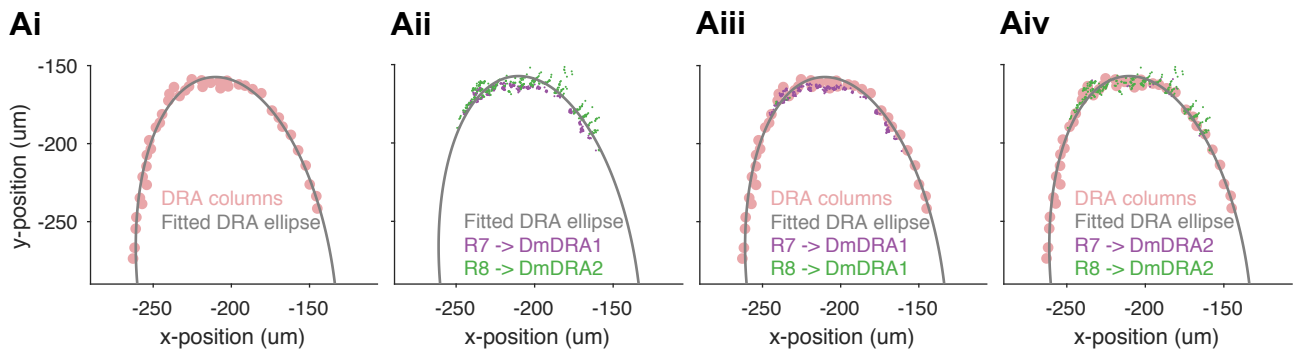

Figure 7 – figure supplement 3

1919 Figure 7 – figure supplement 3: Fitting a linear distance of synapses along the DRA

1920 **Ai.** The lateral locations of the 42 DRA columns (pink circles) were used to fit an ellipse (black  
1921 line) along the DRA, where the lateral x- and y-coordinates are points in a plane that is  
1922 approximately parallel to the medulla layers, and this plane does not take into account the  
1923 curvature of the medulla. At the dorsal pole, there are DRA columns in two rows, and the ellipse  
1924 passes between these. **Aii.** The alignment of R7 (purple) synapses to DmDRA1 cells and R8  
1925 (green) synapses to DmDRA2 vary along an axis that is approximately perpendicular to the  
1926 ellipse, partly due to differences in the locations of the synapses, and partly an effect of the  
1927 curvature of the medulla. For all the synapses, the projection onto the fitted DRA ellipse  
1928 provides a good description of the location along the DRA. **Aiii.** Synapses from R7 (purple) to  
1929 DmDRA1 cells shown with the Mi1 columns (pink circles) to appreciate their locations in the  
1930 columns. The synapses are concentrated around layer 6, and this narrow depth profile  
1931 generates tightly clustered synaptic locations in columns. **Aiv.** Synapses from R8 (green) to  
1932 DmDRA2 cells shown with the Mi1 columns (pink circles) to appreciate their locations in the  
1933 columns. The synapses are spread between the chiasm and layer 6, and this diffuse depth  
1934 profile contributes to the wide, linear clusters of synapses as the medulla curves away from  
1935 the plane containing the fitted DRA ellipse.

1936

**Aj MeTu-DRA**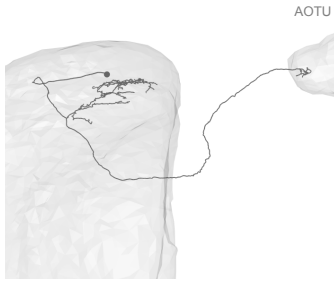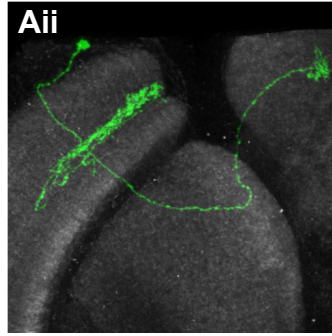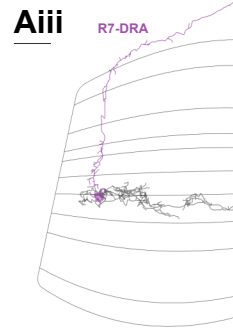**Aiv**

MeTu-DRA (in) 30 cells

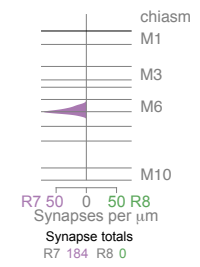**Av** • R7-DRA → MeTu-DRA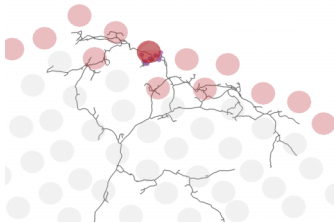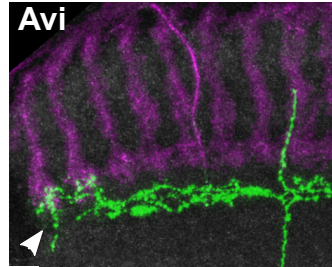**Avii** all MeTu-DRA neurons (12 x) connected to one DRA column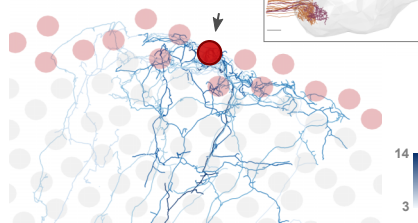**Bi VPN-DRA**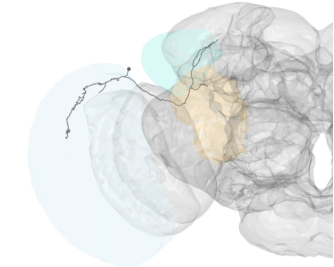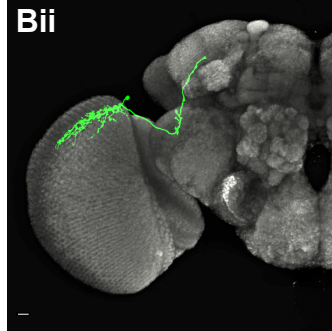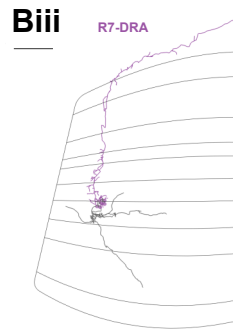**Biv**

VPN-DRA (in) 5 cells

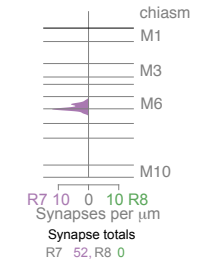**Bv** • R7-DRA → VPN-DRA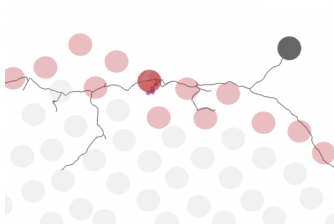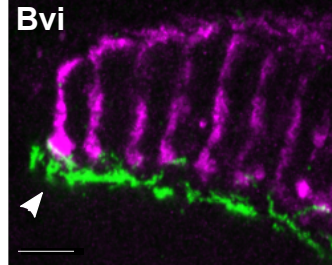**Bvii** 5x VPN-DRA cells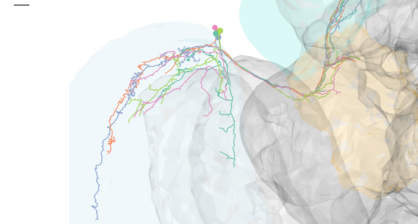

1937 Figure 8: Visual projection neurons directly connecting R7 and R8 of the DRA to the central  
1938 brain

1939 **A.** Synapses of R7-DRA onto MeTu-DRA cells. Ai: The entire skeleton of a fully reconstructed  
1940 MeTu-DRA cell with an axon projecting to the AOTU. Aii: Light microscopic single cell clone of  
1941 a MeTu-DRA cell. Aiii: Side view of a fully reconstructed MeTu-DRA skeleton (grey) innervated  
1942 by R7-DRA (purple). Aiv: Layer distribution of R7-DRA synapses (purple) onto 30 MeTu-DRA  
1943 cells. Av: Top view of the MeTu-DRA skeleton depicting its medulla processes innervating both  
1944 DRA (red circles), and non-DRA columns. Avi: Light microscopic side view of a MeTu-DRA  
1945 single cell clone (green) with exclusive contacts to DRA photoreceptor terminals (white  
1946 arrowhead). Avii: Summary all MeTu-DRA skeletons connected to the same R7-DRA cell  
1947 (circled column, arrow). The saturation of blue color indicates the strength of connectivity (from  
1948 3 to 14 synapses). Inset: MeTu-DRA axon terminations in the AOTU in orange and  
1949 reconstructed MeTus from the central eye in purple. **B.** Synapses between R7-DRA and visual  
1950 projection neurons VPN-DRA. Bi: The entire skeleton of a reconstructed VPN-DRA cell with its  
1951 axon projecting to the PLP. Bii: Light microscopy image of a VPN-DRA single cell with  
1952 projection to the PLP region of the central brain. A neuropile marker is shown in grey. Biii: Side  
1953 view of one VPN-DRA skeleton (grey) innervated by R7-DRA (purple). Biv: Layer distribution  
1954 of R7-DRA synapses onto 5 VPN-DRA cells. Bv: Top view of medulla processes formed by  
1955 one reconstructed VPN-DRA skeleton (grey) with all R7-DRA synapses from the seed column  
1956 (purple). Bvi: Double labeling of several VPN-DRA cells (green) with with R7 and R8  
1957 photoreceptors (purple, anti-Chaoptin). VPN-DRA processes overlap with DRA photoreceptors  
1958 (white arrowhead) but also appear to show some contacts to non-DRA R-cells. Bvii: Skeletons  
1959 of all reconstructed VPN-DRA cells covering the dorsal medulla.

1960



**Ai MeTu-DRA**

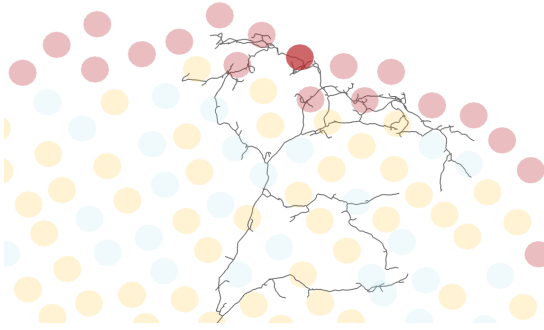

**Bii DRA\_VPN**  
15969128

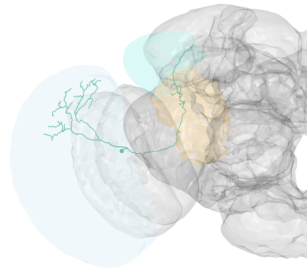

**Biii**

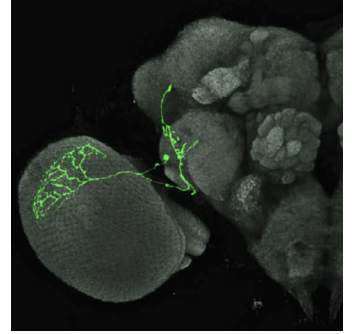

1961 Figure 8 – figure supplement 1: visual projection neuron morphology in the DRA.

1962 **A.** Top view of the fully traced MeTu-DRA cell (same as in Figure 7A) with pale and yellow  
1963 fates of all non-DRA ommatidia indicated. Medulla processes of MeTu-DRA do not seem to  
1964 show any obvious preference for pale or yellow columns. B. Reconstructed skeleton (Bi) of an  
1965 unusual VPN-DRA cell with additional processes in the central brain (putative VPN-DRA2).  
1966 Light microscopy image of a cell with similar morphology (Bii).

1967

**Ai MeMe-DRA** 10439442

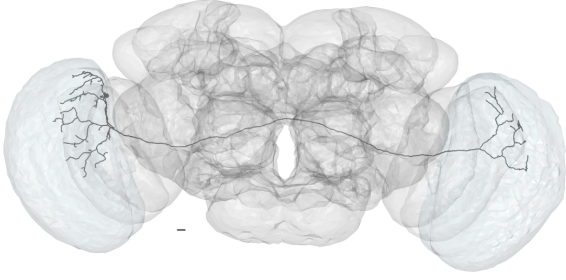

**Aii**

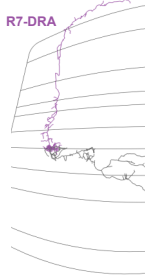

**Aiii**  
MeMe-DRA (in) 2 cells

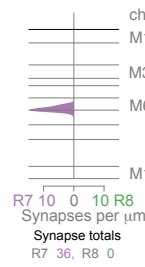

**Aiv**

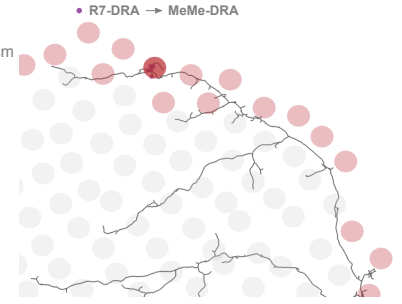

**Av**

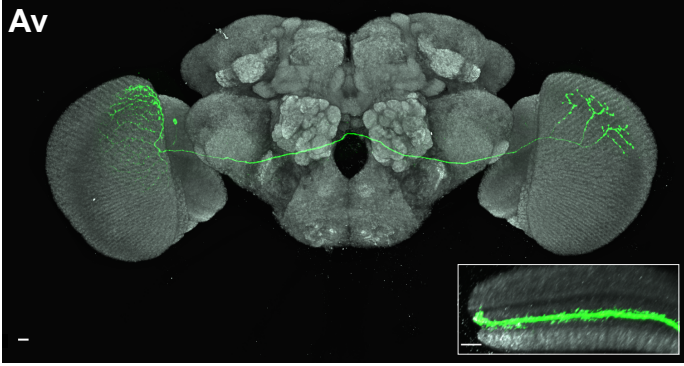

**Avi**

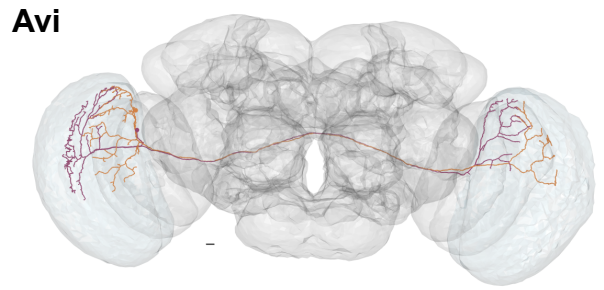

**Bi Mti-DRA-1** 14430736

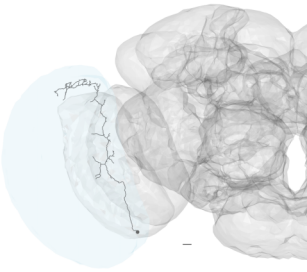

**Bii**

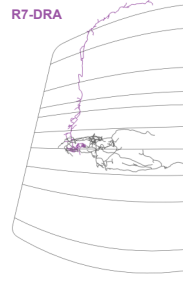

**Biii**  
Mti-DRA-1 (in) 6cells

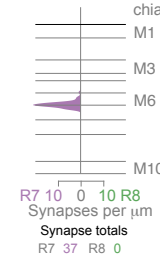

**Biv**

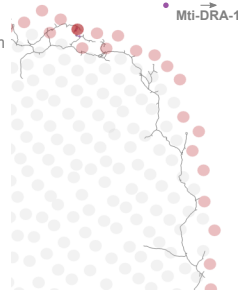

**Bv**

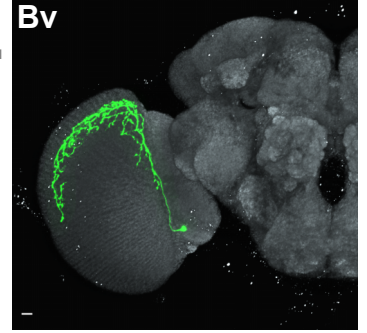

**Ci Mti-DRA-2** 11693571

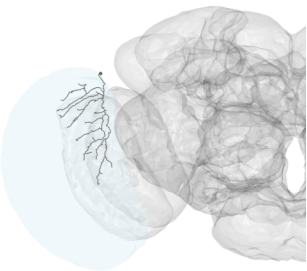

**Cii**

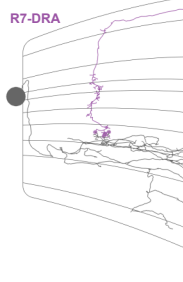

**Ciii**  
Mti-DRA-2(in) 4 cells

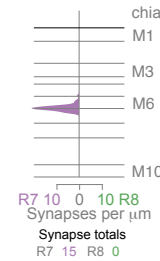

**Civ**

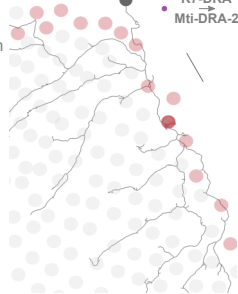

**Cv**

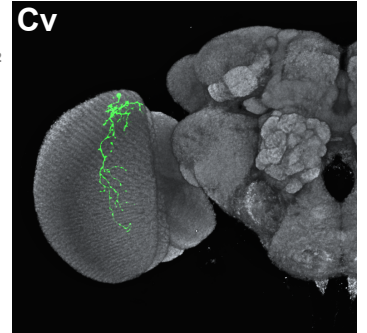

Figure 9

1968 Figure 9: Newly identified photoreceptor targets in the DRA region of the medulla

1969 **A.** Synapses from R7-DRA onto bilaterally projecting MeMe-DRA neurons. Ai: The skeleton of  
1970 a reconstructed MeMe-DRA cell with putative axonic projections to the dorsal periphery of the  
1971 contralateral medulla. Aii: Side view of one MeMe-DRA skeleton (grey) innervated by R7-DRA  
1972 (purple). Aiii: Layer distribution of R7-DRA synapses onto 2 MeMe-DRA cells. Aiv: Top view of  
1973 medulla processes formed by the reconstructed MeMe-DRA skeleton (grey) with all R7-DRA  
1974 synapses from the seed column (purple). Av: Light microscopy image of an MCFO-labeled  
1975 MeMe-DRA single cell (green) with processes to the contralateral medulla. Inset:  
1976 Reconstructed side view of dendrites of a MeMe-DRA cell in the medulla. Note that arbors  
1977 move upwards towards photoreceptor terminals in the DRA region (arrowhead). Avi:  
1978 Neighboring relationships of two reconstructed MeMe-DRA skeletons (purple and orange)  
1979 connecting both medullas in a reciprocal manner, while flipping the innervated DRA regions  
1980 along the anterior-posterior axis. **B.** Synapses from R7-DRA onto medulla tangential intrinsic  
1981 neurons (Mti) forming from two putative Mti-DRA populations (Mti-DRA-1 and Mti-DRA-2).  
1982 Bi: The skeleton of a reconstructed Mti-DRA-1 cell with processes covering the dorsal  
1983 periphery of the medulla. Bii: Side view of one Mti-DRA-1 skeleton (grey) innervated by R7-  
1984 DRA (purple). Biii: Layer distribution of R7-DRA synapses onto 6 Mti-DRA-1 cells. Biv: Top  
1985 view of medulla processes formed by one reconstructed Mti-DRA-1 skeleton (grey) with all R7-  
1986 DRA synapses from the seed column (purple). Bv: Light microscopy image of a single cell  
1987 similar to the reconstructed Mti-DRA covering the dorsal periphery of the medulla. **C.** Synapses  
1988 from R7-DRA onto medulla tangential intrinsic neurons (Mti) Mti-DRA-2 Ci: The skeleton of a  
1989 reconstructed Mti-DRA-2 cell with processes covering dorsal parts of the medulla. Cii: Side  
1990 view of one Mti-DRA-2 skeleton (grey) innervated by R7-DRA (purple). Ciii: Layer distribution  
1991 of R7-DRA synapses onto 4 Mti-DRA-2 cells. Civ: Top view of medulla processes formed by  
1992 one reconstructed Mti-DRA-2 skeleton (grey) with all R7-DRA synapses from the seed column  
1993 (purple). Cv: Light microscopic image of a putatively corresponding single cell clone (green)  
1994 covering dorsal parts of the medulla.

1995

**A** 6x Mti-DRA-1 cells

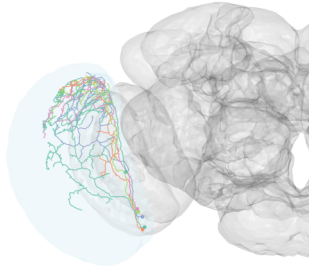

**B** 4x Mti-DRA-2 cells

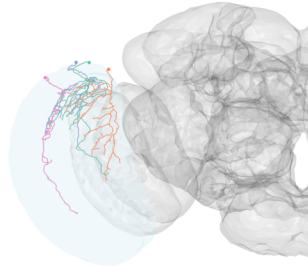

**C**

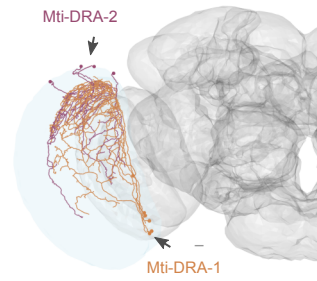

1996 Figure 9 – figure supplement 1: Medulla tangential intrinsic cells in the DRA.

1997 **A.** All reconstructed Mti-DRA-1 skeletons (6x) covering the dorsal medulla. **B.** All reconstructed

1998 Mti-DRA-2 skeletons (4x) covering the dorsal medulla. **C.** Separation of putative Mti-DRA

1999 subtypes. One population with cell bodies located ventrally (putative cell type Mti-DRA1,

2000 orange, arrow), and several cells with dorsally located cell bodies (putative Mti-DRA2, purple,

2001 arrow).

2002

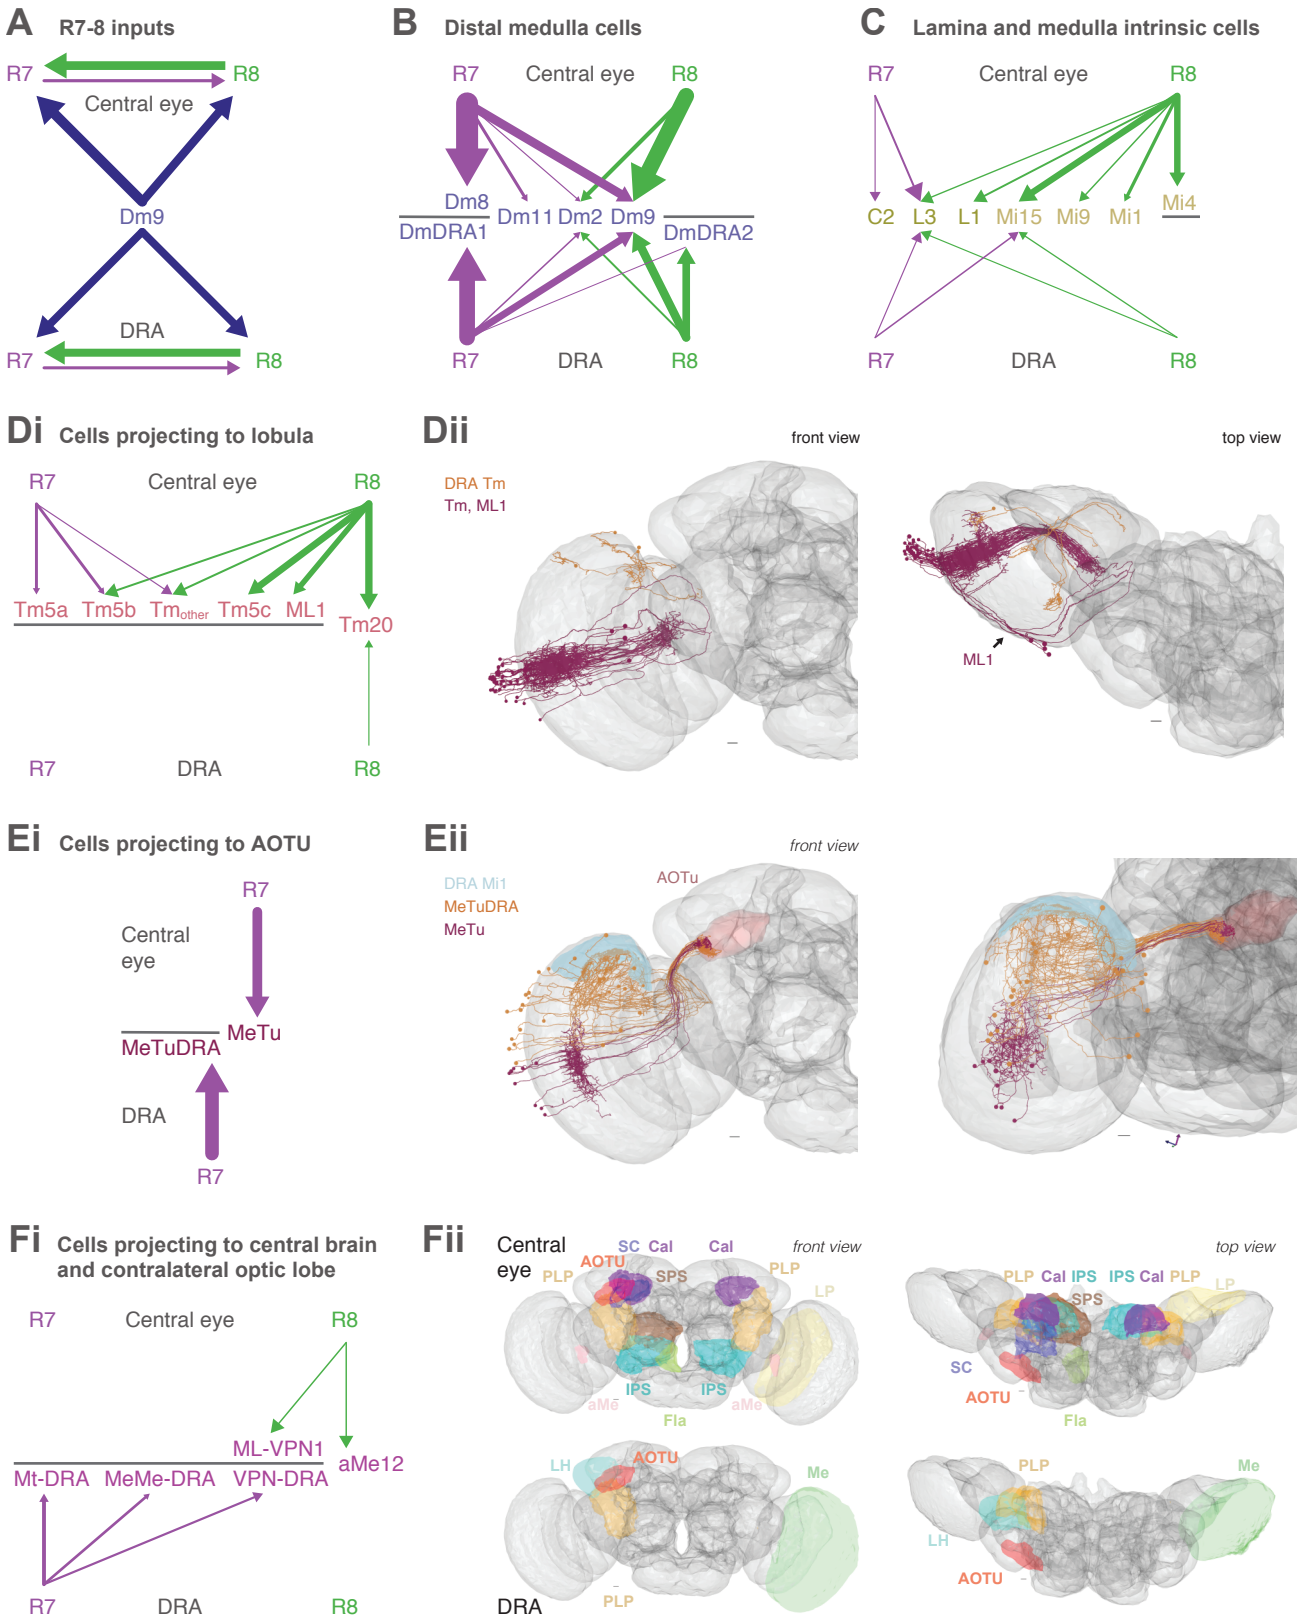

Figure 10



2003 Figure 10: Direct comparison of central versus DRA connectivity by cell type

2004 **A.** Schematic summary of synaptic connections between central or DRA R7 and R8, as well  
2005 as other cell types providing synaptic feedback to them purple). In all panels, arrow widths are  
2006 proportional to the numbers of synapses per seed column, and weak connections were  
2007 excluded for clarity by a threshold of >4 synapses per column. Despite the differences in  
2008 modality, the circuit organization of inputs to R7 and R8 cells is conserved in the central eye  
2009 and DRA. **B.** Synapses between R7/R8 and Dm cell types in central and DRA columns. Note  
2010 the presence of a second Dm8-like cell type downstream of R8 only in the DRA (Dm-DRA2).  
2011 **C.** Summary of inner photoreceptor connections with lamina and Mi and Mti cells in central and  
2012 DRA columns. The connections from R8 to these cells were very reduced in the DRA, and Mi4  
2013 was not a photoreceptor target in the DRA seed columns. **D.** Summary of lobula connections.  
2014 Di: Schematic of central and DRA R7/R8 connections with Tm and ML1 cells. Note the virtual  
2015 absence of lobula connectivity in the DRA. Dii: Front view (left) and top view (right) of all  
2016 reconstructed central Tm and ML1 skeletons (claret) and Tm skeletons from the DRA (orange).  
2017 **E.** Summary of MeTu cell connections. Ei: Schematic of central and DRA R7 cells targeting  
2018 different MeTu populations. Eii: Front view (left) and DRA view (right) of all central MeTu  
2019 skeletons (purple) and MeTu-DRA skeletons (orange), with axons following the same tract but  
2020 terminating with spatially separated axon target areas in the AOTU. **F.** Summary of other visual  
2021 projection neurons. Fi: Diagram summarizing VPN connectivity in central and DRA columns.  
2022 While R8 input dominates in central eye columns, R7 input dominates in the DRA. Fii: Front  
2023 view (left) and top view (right) of VPN target areas in the central brain. VPNs from both central  
2024 eye and DRA project to the posterior lateral protocerebrum (PLP, golden yellow) and the AOTU  
2025 (red). The central eye VPNs additionally project ipsilaterally to the mushroom body calyx  
2026 (mauve), accessory medulla (aMe, pink), superior clamp (SC, dark blue), flange (Fla, green),  
2027 superior posterior slope (SPS, brown), inferior posterior slope (IPS, cyan), and contralaterally  
2028 to the PLP, mushroom body calyx, aMe, and lobula plate (LP, cream). The DRA VPNs project  
2029 ipsilaterally to the AOTU, plp, and lateral horn (LH, turquoise), and contralaterally to the  
2030 medulla (Me, lime green).

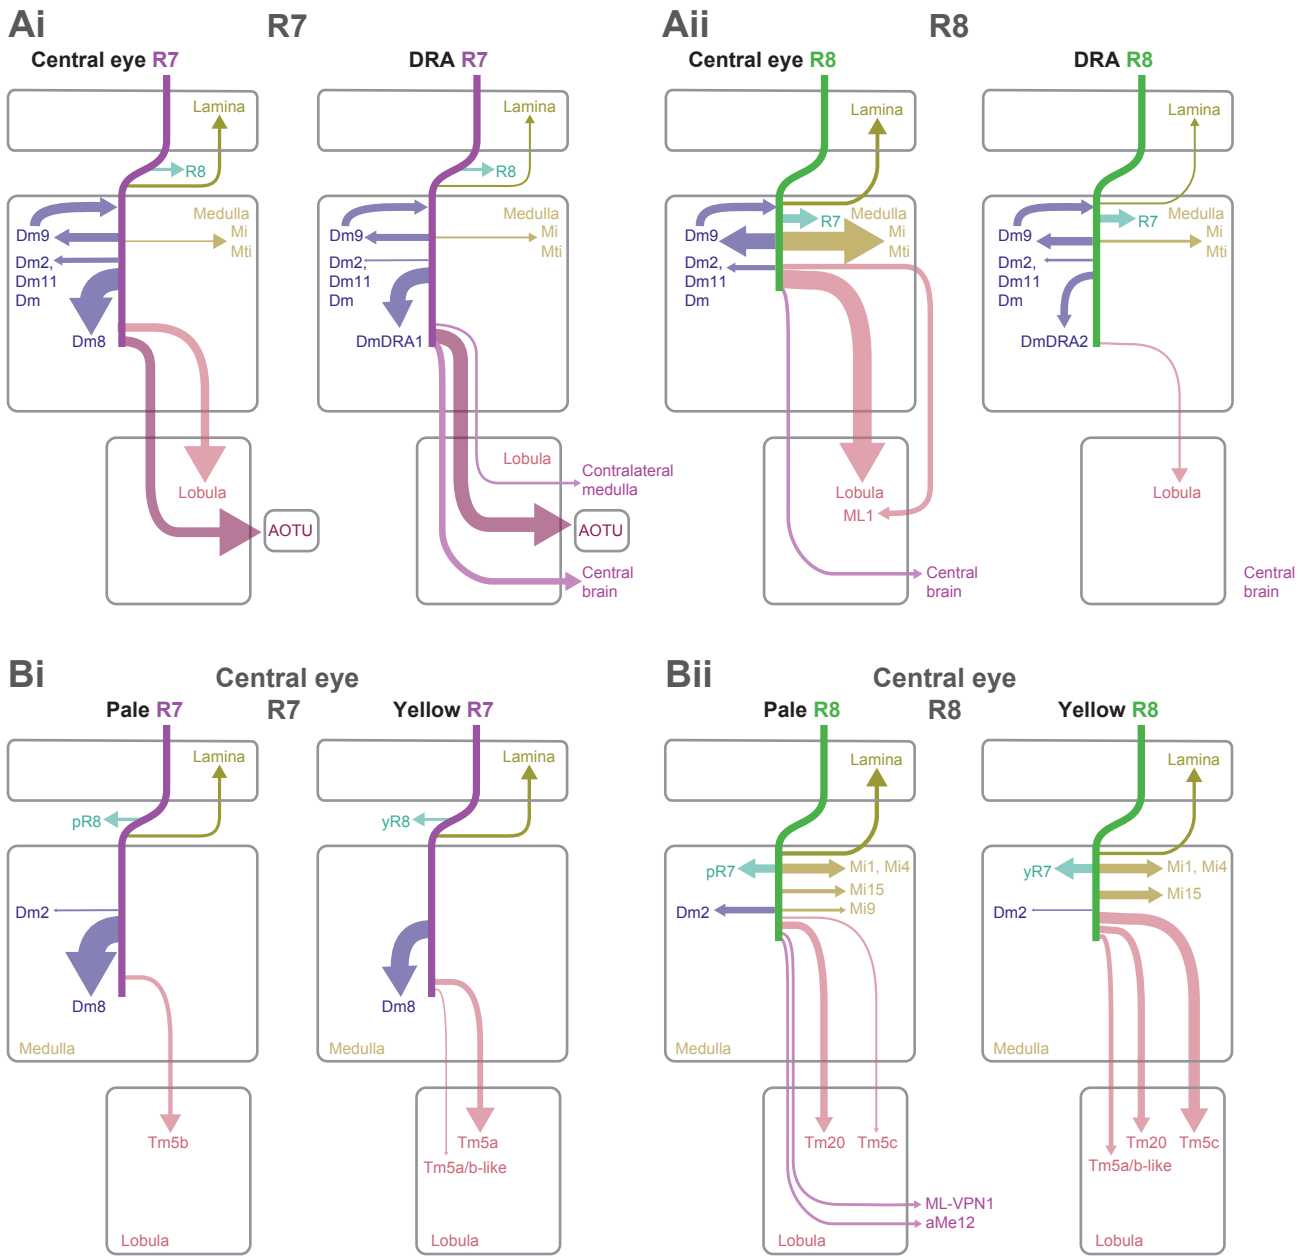

Figure 11

2031 Figure 11: Direct comparison of central versus DRA, and pale versus yellow pathways

2032 **A.** Graphical comparison of central and DRA synaptic pathways. In all panels, the arrow widths  
2033 are proportional to the numbers of synapses per seed column, and weak connections were  
2034 excluded for clarity by a threshold of >4 synapses per column. Ai: Arrows indicating the relative  
2035 weight of R7 connections in central (cell types post-synaptic to pale and yellow R7) and in the  
2036 DRA. Aii: Arrows indicating the relative weight of R8 connections in central (sum of pale and  
2037 yellow R8) and in the DRA. Connections to the lobula neuropil are dominated by R8 targets in  
2038 the central eye. Lobula connections are virtually absent in the DRA (synapse numbers below  
2039 1% of total synapse count), where connectivity of R8-DRA is dramatically reduced, limited to  
2040 local computations in the medulla. The projections to the central brain are driven by R8 in the  
2041 central eye, but by R7 in the DRA. **B.** Graphical comparison of central pale and yellow-specific  
2042 synaptic pathways. Bi: Arrows indicating the relative weight of pale R7 versus yellow R7  
2043 connections in central seed columns. Columnar cell types such as lamina cells have the  
2044 capacity to preserve pale and yellow information, and Dm8 cells are most densely innervated  
2045 by their home column input. Tm5a cells were selective for yellow R7, Tm5b cells were selective  
2046 for pale R7, and the Tm5a-like and Tm5b-like cells were selective for yellow R8, but also  
2047 received yellow R7 synapses. Bii: Arrows indicating the relative weight of pale R8 versus yellow  
2048 R8 connections in central seed columns. Columnar medulla cells that have the capacity to  
2049 preserve pale and yellow information were targets of R8 cells. The aMe12 and ML-VPN1 cell  
2050 types were specific for pale R8 input, while Tm5c had a strong bias for yellow R8, along with  
2051 the Tm5a-like and Tm5b-like cells.

Table 1

## Synaptic targets of central eye seed column R7 and R8 photoreceptors

| Type             | No. | pR7 | yR7 | pR8 | yR8 | Sum  | %R7   | %R8   | %p    | %y    | %Total |
|------------------|-----|-----|-----|-----|-----|------|-------|-------|-------|-------|--------|
| Dm9              | 6   | 94  | 66  | 142 | 143 | 445  | 36.0  | 64.0  | 53.0  | 47.0  | 16.4   |
| Dm8              | 15  | 235 | 161 | 0   | 0   | 396  | 100.0 | 0.0   | 59.3  | 40.7  | 14.6   |
| MeTu             | 7   | 82  | 93  | 0   | 0   | 175  | 100.0 | 0.0   | 46.9  | 53.1  | 6.5    |
| R7               | 5   | 0   | 3   | 75  | 82  | 160  | 1.9   | 98.1  | 46.9  | 53.1  | 5.9    |
| Tm5c             | 6   | 8   | 9   | 20  | 103 | 140  | 12.1  | 87.9  | 20.0  | 80.0  | 5.2    |
| Tm20             | 4   | 5   | 3   | 67  | 65  | 140  | 5.7   | 94.3  | 51.4  | 48.6  | 5.2    |
| Mi15             | 4   | 6   | 7   | 38  | 81  | 132  | 9.8   | 90.2  | 33.3  | 66.7  | 4.9    |
| Mi4              | 4   | 0   | 0   | 58  | 58  | 116  | 0.0   | 100.0 | 50.0  | 50.0  | 4.3    |
| ML1              | 4   | 0   | 0   | 58  | 41  | 99   | 0.0   | 100.0 | 58.6  | 41.4  | 3.7    |
| Dm2              | 4   | 18  | 3   | 60  | 15  | 96   | 21.9  | 78.1  | 81.2  | 18.8  | 3.5    |
| Dm11             | 2   | 28  | 27  | 4   | 4   | 63   | 87.3  | 12.7  | 50.8  | 49.2  | 2.3    |
| L3               | 4   | 19  | 17  | 12  | 13  | 61   | 59.0  | 41.0  | 50.8  | 49.2  | 2.3    |
| Mi1              | 4   | 0   | 0   | 31  | 28  | 59   | 0.0   | 100.0 | 52.5  | 47.5  | 2.2    |
| R8               | 4   | 31  | 26  | 1   | 0   | 58   | 98.3  | 1.7   | 55.2  | 44.8  | 2.1    |
| Tm5a             | 2   | 0   | 53  | 0   | 0   | 53   | 100.0 | 0.0   | 0.0   | 100.0 | 2.0    |
| Tm5b             | 2   | 39  | 0   | 3   | 6   | 48   | 81.2  | 18.8  | 87.5  | 12.5  | 1.8    |
| Tm               | 9   | 17  | 4   | 7   | 16  | 44   | 47.7  | 52.3  | 54.5  | 45.5  | 1.6    |
| Tm5b-like        | 3   | 0   | 14  | 0   | 27  | 41   | 34.1  | 65.9  | 0.0   | 100.0 | 1.5    |
| Mi9              | 4   | 3   | 9   | 26  | 1   | 39   | 30.8  | 69.2  | 74.4  | 25.6  | 1.4    |
| L1               | 4   | 2   | 1   | 21  | 14  | 38   | 7.9   | 92.1  | 60.5  | 39.5  | 1.4    |
| aMe12            | 2   | 4   | 0   | 26  | 0   | 30   | 13.3  | 86.7  | 100.0 | 0.0   | 1.1    |
| Dm               | 5   | 11  | 7   | 6   | 5   | 29   | 62.1  | 37.9  | 58.6  | 41.4  | 1.1    |
| ML-VPN1          | 3   | 0   | 0   | 26  | 1   | 27   | 0.0   | 100.0 | 96.3  | 3.7   | 1.0    |
| C2               | 2   | 7   | 13  | 6   | 0   | 26   | 76.9  | 23.1  | 50.0  | 50.0  | 1.0    |
| Mt-VPN           | 4   | 0   | 12  | 3   | 8   | 23   | 52.2  | 47.8  | 13.0  | 87.0  | 0.8    |
| Mti              | 3   | 2   | 0   | 10  | 7   | 19   | 10.5  | 89.5  | 63.2  | 36.8  | 0.7    |
| Tm5a-like        | 1   | 0   | 1   | 0   | 16  | 17   | 5.9   | 94.1  | 0.0   | 100.0 | 0.6    |
| TmY10            | 1   | 1   | 0   | 6   | 0   | 7    | 14.3  | 85.7  | 100.0 | 0.0   | 0.3    |
| Mi10             | 1   | 0   | 0   | 0   | 5   | 5    | 0.0   | 100.0 | 0.0   | 100.0 | 0.2    |
| Mi               | 1   | 2   | 1   | 0   | 0   | 3    | 100.0 | 0.0   | 66.7  | 33.3  | 0.1    |
| C3               | 1   | 0   | 0   | 0   | 3   | 3    | 0.0   | 100.0 | 0.0   | 100.0 | 0.1    |
| Identified <3    | 26  | 5   | 14  | 14  | 4   | 37   | 51.4  | 48.6  | 51.4  | 48.6  | 1.4    |
| Unidentified >=3 | 2   | 0   | 0   | 5   | 3   | 8    | 0.0   | 100.0 | 62.5  | 37.5  | 0.3    |
| Unidentified <3  | 62  | 9   | 15  | 22  | 24  | 70   | 34.3  | 65.7  | 44.3  | 55.7  | 2.6    |
| Total            | 211 | 628 | 559 | 747 | 773 | 2707 | 43.8  | 56.2  | 50.8  | 49.2  | 100.0  |

## Table 2

Cells that synapse onto central eye seed column R7 and R8 photoreceptors

| Type             | No. | pR7 | yR7 | pR8 | yR8 | Sum | %R7   | %R8   | %p    | %y    | %Total |
|------------------|-----|-----|-----|-----|-----|-----|-------|-------|-------|-------|--------|
| Dm9              | 6   | 90  | 92  | 79  | 72  | 333 | 54.7  | 45.3  | 50.8  | 49.2  | 57.0   |
| R8               | 4   | 75  | 82  | 1   | 0   | 158 | 99.4  | 0.6   | 48.1  | 51.9  | 27.1   |
| R7               | 4   | 0   | 0   | 31  | 26  | 57  | 0.0   | 100.0 | 54.4  | 45.6  | 9.8    |
| Mt-VPN           | 1   | 0   | 2   | 0   | 3   | 5   | 40.0  | 60.0  | 0.0   | 100.0 | 0.9    |
| C2               | 1   | 2   | 3   | 0   | 0   | 5   | 100.0 | 0.0   | 40.0  | 60.0  | 0.9    |
| L3               | 1   | 0   | 0   | 4   | 0   | 4   | 0.0   | 100.0 | 100.0 | 0.0   | 0.7    |
| Identified <3    | 11  | 4   | 2   | 4   | 8   | 18  | 33.3  | 66.7  | 44.4  | 55.6  | 3.1    |
| Unidentified >=3 | 0   | 0   | 0   | 0   | 0   | 0   | 0.0   | 0.0   | 0.0   | 0.0   | 0.0    |
| Unidentified <3  | 4   | 1   | 2   | 1   | 0   | 4   | 75.0  | 25.0  | 50.0  | 50.0  | 0.7    |
| Total            | 32  | 172 | 183 | 120 | 109 | 584 | 60.8  | 39.2  | 50.0  | 50.0  | 100.0  |

### Table 3

#### Synaptic targets of DRA seed column R7 and R8 photoreceptors

| Type             | No. | R7-DRA | R8-DRA | Sum  | %Total | %R7   | %R8   |
|------------------|-----|--------|--------|------|--------|-------|-------|
| Dm-DRA1          | 20  | 212    | 0      | 212  | 15.9   | 25.3  | 0.0   |
| Dm9              | 6   | 95     | 115    | 210  | 15.7   | 11.3  | 23.0  |
| MeTu-DRA         | 30  | 184    | 0      | 184  | 13.8   | 22.0  | 0.0   |
| R7-DRA           | 3   | 1      | 108    | 109  | 8.2    | 0.1   | 21.6  |
| Dm-DRA2          | 9   | 3      | 103    | 106  | 7.9    | 0.4   | 20.6  |
| Dm2              | 4   | 21     | 27     | 48   | 3.6    | 2.5   | 5.4   |
| R8-DRA           | 3   | 41     | 1      | 42   | 3.1    | 4.9   | 0.2   |
| Mi15             | 4   | 21     | 18     | 39   | 2.9    | 2.5   | 3.6   |
| Mti-DRA-1        | 6   | 37     | 0      | 37   | 2.8    | 4.4   | 0.0   |
| MeMe-DRA         | 2   | 36     | 0      | 36   | 2.7    | 4.3   | 0.0   |
| L3               | 3   | 16     | 16     | 32   | 2.4    | 1.9   | 3.2   |
| VPN-DRA          | 6   | 30     | 0      | 30   | 2.2    | 3.6   | 0.0   |
| L1               | 3   | 9      | 9      | 18   | 1.3    | 1.1   | 1.8   |
| Tm20             | 3   | 0      | 16     | 16   | 1.2    | 0.0   | 3.2   |
| Mti-DRA-2        | 4   | 15     | 0      | 15   | 1.1    | 1.8   | 0.0   |
| Mi1              | 3   | 6      | 9      | 15   | 1.1    | 0.7   | 1.8   |
| MeTu             | 2   | 13     | 0      | 13   | 1.0    | 1.6   | 0.0   |
| Tm5-like         | 1   | 0      | 12     | 12   | 0.9    | 0.0   | 2.4   |
| Mi9              | 2   | 0      | 12     | 12   | 0.9    | 0.0   | 2.4   |
| Dm11             | 1   | 4      | 8      | 12   | 0.9    | 0.5   | 1.6   |
| aMe12            | 1   | 3      | 1      | 4    | 0.3    | 0.4   | 0.2   |
| TmY              | 1   | 0      | 3      | 3    | 0.2    | 0.0   | 0.6   |
| ML-VPN2          | 1   | 3      | 0      | 3    | 0.2    | 0.4   | 0.0   |
| C2               | 1   | 2      | 1      | 3    | 0.2    | 0.2   | 0.2   |
| Identified <3    | 33  | 34     | 14     | 48   | 3.6    | 4.1   | 2.8   |
| Unidentified >=3 | 2   | 5      | 5      | 10   | 0.7    | 0.6   | 1.0   |
| Unidentified <3  | 57  | 46     | 21     | 67   | 5.0    | 5.5   | 4.2   |
| Total            | 211 | 837    | 499    | 1336 | 100.0  | 100.0 | 100.0 |

## Table 4

Cells that synapse onto DRA seed column R7 and R8 photoreceptors

| Type             | No. | R7-DRA | R8-DRA | Sum | %Total | %R7   | %R8   |
|------------------|-----|--------|--------|-----|--------|-------|-------|
| Dm9              | 4   | 105    | 106    | 211 | 54.7   | 46.1  | 67.1  |
| R8-DRA           | 3   | 108    | 1      | 109 | 28.2   | 47.4  | 0.6   |
| R7-DRA           | 3   | 1      | 41     | 42  | 10.9   | 0.4   | 25.9  |
| C2               | 2   | 4      | 4      | 8   | 2.1    | 1.8   | 2.5   |
| Mi15             | 1   | 2      | 2      | 4   | 1.0    | 0.9   | 1.3   |
| Identified <3    | 9   | 6      | 3      | 9   | 2.3    | 2.6   | 1.9   |
| Unidentified >=3 | 0   | 0      | 0      | 0   | 0.0    | 0.0   | 0.0   |
| Unidentified <3  | 2   | 2      | 1      | 3   | 0.8    | 0.9   | 0.6   |
| Total            | 24  | 228    | 158    | 386 | 100.0  | 100.0 | 100.0 |
